# Supplementary material for: Combination of a nanocarrier delivery system with genetic manipulation further improves pesticide efficiency: a case study with chlorfenapyr
Source: Royal Society of Chemistry journal article supplement (doi:10.1039/d2en00126h), 2022-01-01

**A** Toxicity of chlorfenapyr against 3<sup>rd</sup> instar larvae

Mix chlorfenapyr  
with artificial diet

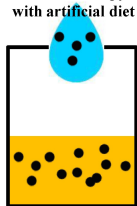

Sponge tent

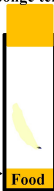

Releasing larvae

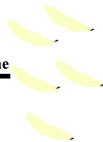

**B**

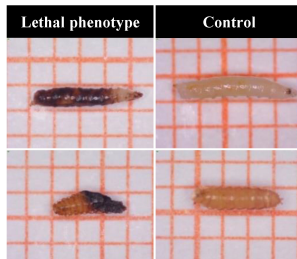

Supplement: d2en00126h1.pdf [file d2en00126h1.pdf]
