# Supplementary material for: Combination of a nanocarrier delivery system with genetic manipulation further improves pesticide efficiency: a case study with chlorfenapyr
Source: Royal Society of Chemistry journal article supplement (doi:10.1039/d2en00126h), 2022-01-01
Supplement: d2en00126h6.xlsx [file d2en00126h6.xlsx]

## Sheet: Control-L1_Control-L2_Control-L
#ID	gene_name	Control-L1_Count	Control-L2_Count	Control-L3_Count	C-L1_Count	C-L2_Count	C-L3_Count	Control-L1_FPKM	Control-L2_FPKM	Control-L3_FPKM	C-L1_FPKM	C-L2_FPKM	C-L3_FPKM	pValue	FDR	log2FC	regulated
FBgn0039436	TwdlB	94	114	142	9	8	6	3.46467	4.12903	5.85898	0.4259	0.422656	0.275968	1.50731e-25	6.04911e-24	-3.36312	down
FBgn0035552	CG11350	27044	16216	21848	2095	2077	2176	996.496	586.709	808.138	92.7885	97.8687	99.4276	2.99883e-91	6.3183e-89	-3.23795	down
FBgn0039441	TwdlN	860	947	883	75	84	109	29.2286	31.7736	32.9637	3.25383	3.78781	4.51257	5.51875e-99	1.28646e-96	-3.20752	down
FBgn0262023	CG42834	49	51	39	0	3	3	8.30953	8.49172	7.03357	0	0.691174	0.648477	6.53692e-14	1.03795e-12	-3.15569	down
FBgn0035582	CG13705	4327	3168	3729	380	426	403	184.19	136.291	162.76	19.1426	21.5953	19.7074	9.02058e-111	2.60078e-108	-3.11698	down
FBgn0283427	FASN1	79034	43965	54004	6301	6291	6183	300.053	160.124	220.342	28.5481	29.2063	27.3262	8.70599e-72	1.42362e-69	-3.10567	down
FBgn0035006	CG4563	2696	2865	2897	332	329	340	48.8458	49.8978	57.1323	7.45982	7.63773	7.34146	3.80824e-194	2.4543e-191	-3.00864	down
FBgn0053105	p24-2	636	554	592	56	80	68	21.9679	17.0469	22.6076	2.21264	2.49835	2.75052	3.34038e-68	5.08294e-66	-2.99308	down
FBgn0033246	ACC	24093	14275	17185	2311	2423	2369	108.534	62.2915	83.2545	12.6016	13.4571	12.6565	2.33459e-67	3.36549e-65	-2.85377	down
FBgn0034429	AANATL4	139	214	219	26	17	27	10.5985	15.8538	17.5603	2.25705	1.50888	2.25758	1.20792e-26	5.10965e-25	-2.756	down
FBgn0039434	TwdlM	75	76	99	12	7	8	2.44661	2.43886	3.50847	0.523492	0.31867	0.337066	9.23288e-17	2.01104e-15	-2.73405	down
FBgn0036750	CG6034	151	195	181	23	23	23	5.23246	6.44281	6.58644	0.861835	0.868193	0.841367	5.07965e-29	2.41968e-27	-2.69908	down
FBgn0003373	Sgs3	7207	5256	5704	965	973	979	201.937	135.593	169.303	32.0919	33.5181	32.601	1.79003e-79	3.21501e-77	-2.55681	down
FBgn0038541	TyrRII	56	56	45	5	7	6	0.717641	0.697703	0.54713	0.0922938	0.0980676	0.0881736	1.19067e-11	1.42413e-10	-2.51096	down
FBgn0052603	CG32603	8870	5601	7209	1332	1227	1129	393.977	237.472	329.839	69.5787	67.6937	58.498	7.34299e-55	8.4684e-53	-2.45843	down
FBgn0031107	HERC2	3475	1623	2546	398	365	396	6.56396	2.98166	5.03077	0.913375	0.864522	0.898486	2.94973e-16	6.05192e-15	-2.41835	down
FBgn0053196	dpy	7185	3083	4585	762	738	713	12.8409	5.80059	8.51221	1.99248	2.33461	2.15056	5.49767e-13	7.84277e-12	-2.36671	down
FBgn0035553	CG13722	410	247	264	48	63	48	6.43507	3.69234	4.32029	0.861611	1.14492	0.857468	1.26348e-23	4.36676e-22	-2.35049	down
Trans_newGene_98	-	40	30	36	0	6	5	1.58709	1.11098	1.42473	2.24958e-17	0.251525	0.200087	4.23801e-08	2.97639e-07	-2.33118	down
FBgn0011286	RyR	4125	2005	2637	501	458	473	7.35794	3.43212	5.16621	1.09702	1.02786	0.998716	2.80602e-14	4.62297e-13	-2.30716	down
FBgn0016075	vkg	37894	19591	25578	4754	4540	4731	149.156	74.652	108.149	23.422	22.8168	22.6857	2.68281e-16	5.53539e-15	-2.30642	down
FBgn0003057	CG10598	201	262	187	44	36	38	7.56158	9.53684	7.02673	1.76726	1.44092	1.52906	3.17495e-25	1.23789e-23	-2.28981	down
FBgn0039438	TwdlO	2778	2684	2713	559	434	613	144.831	137.049	151.578	34.8377	28.1504	36.9297	3.82252e-68	5.73692e-66	-2.27014	down
FBgn0035545	CG12607	1854	1914	1812	386	324	432	125.759	127.4	126.83	28.7183	24.2573	31.3029	5.05675e-72	8.39421e-70	-2.21559	down
FBgn0000299	Col4a1	58681	32460	40469	8746	8913	9090	241.745	129.143	182.275	45.2578	46.8127	45.4618	1.05688e-36	6.93365e-35	-2.19796	down
FBgn0033774	CG12374	118	103	125	25	23	16	3.43288	2.87477	3.92386	0.868955	0.820704	0.530423	3.8568e-16	7.82501e-15	-2.19521	down
FBgn0037996	CG4830	2565	2446	2601	547	497	554	49.4966	45.2207	54.2637	12.5268	11.657	12.3046	4.6727e-95	1.02388e-92	-2.19002	down
FBgn0032839	AANATL3	222	336	300	65	60	49	15.165	21.5987	21.5099	4.85856	4.69443	3.51861	4.76067e-26	1.97568e-24	-2.15535	down
FBgn0032136	Apoltp	17670	9474	11865	2813	2840	2896	53.7458	27.4123	38.3624	9.34631	9.47454	9.38345	3.96559e-31	2.03977e-29	-2.0879	down
FBgn0003372	Sgs1	854	421	631	120	140	146	4.92714	2.21362	4.34417	0.853213	1.00526	0.958646	1.33845e-21	4.07334e-20	-2.08756	down
FBgn0043854	slam	59	30	24	5	8	3	0.444606	0.219311	0.208791	0.0502526	0.0846169	0.0344846	1.0163e-06	5.42092e-06	-2.05931	down
FBgn0030674	HUWE1	6131	3031	4125	858	895	921	11.9871	5.69909	8.5232	1.97473	2.10524	2.07989	1.82416e-12	2.42837e-11	-2.05911	down
FBgn0020306	dom	7362	4834	5677	1411	1338	1309	24.5344	15.4681	19.87	5.37702	5.18957	4.92704	1.48524e-42	1.1623e-40	-2.05819	down
FBgn0013733	shot	12970	6282	8366	1849	1852	1851	20.7263	9.57402	14.4579	3.82606	3.84655	3.63514	1.28349e-11	1.5235e-10	-2.04351	down
FBgn0264339	CG43795	1015	662	757	194	186	171	5.59311	3.54558	4.37873	1.287	1.26905	1.11817	5.1636e-31	2.64357e-29	-2.04219	down
FBgn0003375	Sgs5	8327	11799	10159	2375	2261	2380	1117.47	1527.35	1399.48	326.807	310.122	318.917	2.9099e-70	4.62041e-68	-2.0394	down
FBgn0001187	Hex-C	479	531	538	111	97	146	14.4663	15.3824	17.0545	3.77825	3.33648	4.80847	2.49172e-35	1.54233e-33	-2.02992	down
FBgn0053087	LRP1	4010	2009	2563	531	600	618	10.1521	4.83684	6.74158	1.49443	1.71078	1.7241	1.26002e-11	1.49889e-10	-2.02964	down
FBgn0033661	CG13185	1367	710	862	211	256	192	3.11907	1.53719	2.09803	0.526654	0.640033	0.461065	8.24861e-22	2.53142e-20	-2.02658	down
FBgn0050457	CG30457	2022	1522	1694	395	389	441	248.148	181.608	224.707	54.1155	58.174	57.7262	1.27376e-46	1.13458e-44	-2.02061	down
FBgn0002526	LanA	15770	8052	10447	2437	2263	2453	45.8028	22.2935	32.3693	8.04261	7.57744	7.91926	2.50326e-12	3.2924e-11	-2.01829	down
FBgn0020236	ATPCL	9637	7263	7556	1822	1960	2002	101.736	73.5012	83.6494	21.757	24.0657	23.5788	8.81323e-53	9.46645e-51	-2.01124	down
FBgn0086451	l(2)k09022	991	580	718	148	187	200	6.72104	3.76853	5.10349	1.11172	1.38142	1.43878	1.08911e-23	3.77605e-22	-1.98078	down
FBgn0003378	Sgs8	4194	6502	6087	1392	1410	1218	1987.32	2990.22	2992.96	660.093	718.794	543.625	8.34734e-46	7.20106e-44	-1.97684	down
FBgn0046878	Obp83cd	541	688	701	170	150	155	32.9217	41.1249	45.9547	11.3361	10.2846	10.1562	5.30283e-40	3.87319e-38	-1.93691	down
FBgn0024315	Picot	3843	2998	3174	873	798	849	71.6257	54.1963	63.6142	20.3664	18.1146	18.7462	1.24429e-50	1.28608e-48	-1.92413	down
FBgn0040764	CG13230	5904	6690	5950	1462	1584	1662	3793.09	4211.68	4097.05	954.64	1134.78	994.046	3.6099e-88	7.19092e-86	-1.92116	down
FBgn0263531	mir-4955	32586	17015	21507	5447	5351	5363	102.21	50.5257	70.342	18.1702	18.4213	17.7476	1.09996e-11	1.32285e-10	-1.91681	down
FBgn0034204	CG10953	6574	4195	4802	1303	1325	1299	442.326	278.244	337.397	99.4298	105.273	100.554	2.65732e-34	1.60848e-32	-1.90736	down
FBgn0038740	CG4562	4127	2872	3055	846	917	801	29.3342	18.995	23.0414	6.55002	7.16471	6.04763	1.15044e-36	7.5025e-35	-1.89479	down
FBgn0038509	CG14332	103	144	154	2	24	17	20.6794	28.2831	32.8291	0.54354	5.33358	3.66146	6.4997e-05	0.000239364	-1.89392	down
FBgn0267505	pre-rRNA:CR45845	4661	2366	2463	782	653	661	64.3168	30.6178	33.8875	9.72131	7.83562	8.21094	1.62584e-08	1.23663e-07	-1.86794	down
FBgn0263132	Cht6	1732	994	1217	282	340	386	5.07085	3.03351	3.47956	1.23136	1.70733	2.05605	2.23097e-22	7.0643e-21	-1.8629	down
FBgn0042131	CG18808	5642	2890	3710	915	976	993	14.156	6.90273	10.0046	4.28856	4.133	4.10547	9.99172e-11	1.04455e-09	-1.86141	down
FBgn0022710	Ac13E	956	551	544	169	170	183	5.26542	2.89248	3.25653	1.04667	1.09133	1.11159	4.96343e-19	1.29784e-17	-1.85492	down
FBgn0032817	CG10631	1088	677	801	224	205	237	3.07186	1.83003	2.41564	0.718187	0.675363	0.761881	9.44407e-25	3.54347e-23	-1.84943	down
FBgn0031879	uif	3986	2168	2759	747	827	765	10.6371	5.55195	7.80446	2.39602	2.74729	2.40516	1.04165e-23	3.62297e-22	-1.83451	down
FBgn0286071	AdamTS-A	1528	972	1148	291	304	366	7.5116	4.75317	6.09951	1.7643	1.84645	2.13982	7.82807e-26	3.20016e-24	-1.83295	down
FBgn0262508	CG43078	5443	3427	4082	1122	1165	1155	18.9625	11.5687	15.5734	4.5409	4.71729	4.35662	2.67864e-31	1.41092e-29	-1.83295	down
FBgn0003377	Sgs7	8397	11798	9665	2660	2526	2850	6157.56	8240.3	7394.3	1905.33	1961.47	1860.63	2.34535e-54	2.622e-52	-1.82539	down
FBgn0022160	Gpo1	13643	11394	12477	3546	3404	3292	185.514	149.459	181.396	58.5458	58.2272	53.3985	1.35048e-62	1.82665e-60	-1.81657	down
FBgn0023458	Rbcn-3A	3834	1947	2708	790	782	678	11.4909	5.62121	8.6173	2.82461	2.84745	2.36542	5.53071e-21	1.61585e-19	-1.81291	down
FBgn0034662	CG13492	9717	5499	7031	2012	2023	1971	41.2666	22.3709	31.5745	9.62149	9.83087	9.26364	5.4417e-26	2.24978e-24	-1.80309	down
FBgn0259108	futsch	293	139	175	58	36	58	0.399742	0.17338	0.249462	0.243476	0.189809	0.0865615	7.87888e-11	8.34826e-10	-1.7975	down
FBgn0036717	CG13731	14805	7990	10343	2982	3112	2862	177.344	92.3453	129.611	44.277	47.8364	43.0281	6.59088e-24	2.32934e-22	-1.79713	down
FBgn0010051	Itp-r83A	2824	1702	1972	630	575	570	10.9304	5.98869	7.78841	3.14132	2.93621	2.57295	3.77091e-25	1.45986e-23	-1.78501	down
FBgn0034734	CG4554	584	333	388	104	113	131	2.84788	1.54977	2.00762	0.564362	0.619078	0.697545	6.46841e-17	1.4404e-15	-1.78464	down
FBgn0029167	Hml	6392	2921	4133	1053	1165	1062	22.3337	9.73247	15.3402	4.06778	4.52564	4.01221	1.93238e-08	1.45008e-07	-1.77209	down
FBgn0001075	ft	1031	428	654	167	143	187	2.31186	0.919476	1.55163	0.420659	0.363766	0.462563	2.50538e-07	1.5245e-06	-1.76582	down
FBgn0031077	THADA	833	579	815	197	211	211	5.35834	3.64323	5.45592	1.53966	1.7102	1.63929	2.73104e-26	1.14204e-24	-1.761	down
FBgn0004167	kst	8631	4842	5782	1740	1765	1852	18.3107	9.91605	13.358	4.36356	4.50263	4.51426	1.85018e-23	6.33456e-22	-1.7581	down
FBgn0267507	pre-rRNA:CR45847	16478	8626	3141	1027	1726	1881	177.373	87.1151	33.9755	10.177	16.5875	18.5723	0.00010856	0.00038048	-1.75404	down
FBgn0031078	Nup205	1827	1031	1380	392	396	393	9.93327	5.43235	7.85884	2.51526	2.62601	2.49286	3.56178e-22	1.11813e-20	-1.75113	down
FBgn0266717	Bruce	4002	2148	2562	796	801	833	11.4088	5.81967	7.64962	2.4674	2.48931	2.53403	1.01299e-20	2.91294e-19	-1.74703	down
FBgn0263968	nonC	2084	1175	1364	465	405	419	8.92927	4.96387	6.20934	2.63648	2.43466	2.41853	1.31246e-20	3.75438e-19	-1.74613	down
FBgn0038968	CG12499	656	390	436	138	149	123	4.98307	2.83179	3.45836	1.11132	1.2075	0.971048	1.18178e-17	2.80859e-16	-1.74266	down
FBgn0030266	CG11122	1280	680	958	273	261	280	2.64318	1.36584	2.08992	0.688988	0.680246	0.698552	4.57588e-19	1.20224e-17	-1.73924	down
FBgn0263110	CG43367	1055	585	682	209	212	226	5.43838	3.79242	4.13485	2.36293	1.99137	2.2214	2.69284e-18	6.64478e-17	-1.73786	down
FBgn0027579	mino	3354	2563	2746	847	858	800	41.2158	30.8067	35.6943	12.4461	12.9224	11.5038	1.70202e-39	1.21087e-37	-1.72614	down
FBgn0036831	CG6839	640	876	754	223	232	196	19.5922	25.9214	24.9379	7.96786	8.46257	6.7323	2.77347e-33	1.5909e-31	-1.7227	down
FBgn0037167	CG11425	1305	1535	1446	412	416	418	81.6444	93.3667	95.1011	29.2437	30.6482	28.8139	1.36061e-57	1.69396e-55	-1.72249	down
FBgn0010549	l(2)03659	525	437	388	134	139	113	5.08349	4.03979	3.9634	1.44286	1.51841	1.20721	7.18725e-23	2.36467e-21	-1.71519	down
FBgn0003366	sev	905	452	630	180	197	182	3.59373	1.73548	2.73157	0.85493	1.02334	0.867121	5.49864e-16	1.09732e-14	-1.71447	down
FBgn0035162	Sf3b3	8308	6323	6780	2076	2149	2030	86.4206	63.3459	74.6882	25.827	27.6866	23.853	8.9765e-42	6.87738e-40	-1.71412	down
FBgn0051044	lncRNA:CR31044	52	40	56	10	14	12	0.903236	0.599165	1.05568	0.11588	0.152046	0.224679	7.52957e-07	4.12761e-06	-1.70489	down
FBgn0036749	CG7460	278	283	346	63	78	115	6.11008	5.97487	8.012	1.61689	1.9945	2.86061	1.83398e-16	3.87896e-15	-1.70304	down
FBgn0033688	Prp8	3358	2030	2193	664	755	775	17.1129	9.74171	11.7346	3.77095	4.35555	4.31384	3.71224e-22	1.16204e-20	-1.7026	down
FBgn0036607	CG13059	82	71	78	29	17	14	11.9628	10.2342	11.7032	4.70579	2.87554	2.29956	2.20152e-08	1.63082e-07	-1.69883	down
FBgn0023518	trr	827	497	614	201	186	171	3.08623	1.78943	2.4029	0.877779	0.830578	0.737004	2.84281e-19	7.54137e-18	-1.69841	down
FBgn0035041	CG13594	36	20	46	3	4	13	0.440131	0.240029	0.564342	0.0429333	0.0684507	0.18166	6.77049e-05	0.000248251	-1.69782	down
FBgn0043884	mask	4234	2286	2754	930	878	885	9.26576	4.77207	6.36286	2.34926	2.23058	2.19954	6.75005e-20	1.85813e-18	-1.6923	down
FBgn0026576	Pisd	2146	2448	2426	679	747	665	52.091	57.1765	61.0079	17.8743	20.0709	16.9536	1.44476e-61	1.88438e-59	-1.69036	down
FBgn0086906	sls	4967	2720	3524	1081	1039	1157	7.4527	3.95369	5.87225	2.14713	2.10251	2.23917	6.03199e-21	1.75296e-19	-1.68653	down
FBgn0051439	Muc96D	11915	6791	7770	2613	2470	2687	77.0542	37.7058	58.5538	20.7413	19.8742	20.0626	7.49114e-22	2.31191e-20	-1.6842	down
FBgn0001325	Kr	668	536	544	181	166	170	14.2174	11.0436	11.7728	3.91143	3.53986	3.59286	2.6057e-27	1.14651e-25	-1.68	down
FBgn0039016	Dcr-1	831	630	691	204	220	214	4.27615	3.1022	3.72176	1.18831	1.30419	1.2309	4.91394e-28	2.22468e-26	-1.67879	down
FBgn0039214	puf	2424	1197	1614	493	498	533	6.11572	2.91762	4.30556	1.44034	1.50599	1.59728	4.11495e-17	9.35339e-16	-1.67851	down
FBgn0021796	Tor	1572	943	1086	381	335	347	7.41849	4.25649	5.46332	2.05476	1.82978	1.82777	1.71229e-20	4.84751e-19	-1.67126	down
FBgn0034618	CG9485	1530	946	1132	396	320	352	11.4731	6.91637	9.01961	3.41062	2.87416	2.97222	3.02354e-21	9.02613e-20	-1.66911	down
FBgn0038986	sit	722	744	747	235	207	224	19.7062	19.2145	21.6447	7.1207	6.37266	6.61951	4.37704e-40	3.21845e-38	-1.66706	down
FBgn0261260	mgl	1359	694	957	293	310	285	2.74855	1.3345	2.05985	0.678561	0.733425	0.653298	1.2572e-16	2.71139e-15	-1.65859	down
FBgn0037801	CG3999	3001	2464	2631	782	878	821	36.4984	28.6968	33.9352	10.8891	12.337	11.0573	3.48384e-42	2.68795e-40	-1.64745	down
FBgn0052702	Cubn	1767	957	1223	403	386	392	6.25863	3.2582	4.5544	1.61195	1.56751	1.546	3.27538e-18	8.0285e-17	-1.64711	down
FBgn0039152	Root	9813	7738	8047	2654	2742	2512	36.7645	28.1365	32.8883	12.2693	12.889	11.2965	8.65383e-41	6.49393e-39	-1.63633	down
FBgn0003048	pcx	890	488	674	197	205	223	2.48876	1.31179	2.00143	0.642197	0.675279	0.710337	2.58978e-16	5.37379e-15	-1.61554	down
FBgn0039324	CG10553	173	195	194	53	63	54	7.11165	7.56965	8.35884	2.25007	2.66287	2.23384	6.08756e-16	1.21044e-14	-1.61312	down
FBgn0266756	btsz	4249	2708	2960	1034	966	1089	16.2613	10.8813	11.7557	6.32388	5.66172	6.2211	5.13808e-23	1.71103e-21	-1.60718	down
FBgn0053519	Unc-89	4906	2592	3290	1134	1089	1109	12.8661	6.53923	9.41887	3.61781	3.5742	3.41331	4.27154e-18	1.03767e-16	-1.60673	down
FBgn0053556	form3	1188	846	958	313	293	328	5.54656	3.82967	4.72865	1.73815	1.66923	1.79092	2.59358e-25	1.02213e-23	-1.6063	down
FBgn0004852	Ac76E	2047	1546	1661	542	575	545	16.2747	11.7778	13.8171	4.80682	5.34467	4.8724	2.77845e-31	1.45649e-29	-1.59629	down
FBgn0003137	Ppn	11036	5415	7318	2362	2286	2161	35.0666	16.4946	24.9982	9.01667	9.04291	8.35595	7.78613e-08	5.21423e-07	-1.59459	down
FBgn0052271	CG32271	48	31	30	7	9	11	2.87195	1.83493	1.89078	0.490249	0.660261	0.721762	3.31359e-05	0.000129702	-1.59282	down
FBgn0011589	Elk	126	96	85	26	32	32	1.01406	0.744765	0.753051	0.235897	0.292255	0.283358	3.65932e-09	3.09587e-08	-1.59206	down
FBgn0038730	CG6300	57	41	51	17	12	11	1.52522	1.04338	1.45756	0.496974	0.368885	0.316206	3.19885e-06	1.53848e-05	-1.59159	down
FBgn0039820	CG15554	162	154	170	41	36	69	11.6731	10.7902	12.3157	3.26786	2.92674	5.88981	3.31859e-11	3.72144e-10	-1.58877	down
FBgn0000639	Fbp1	22100	15473	18025	6055	5868	5780	225.535	151.97	200.018	73.9716	73.1936	68.4808	1.39752e-31	7.39671e-30	-1.58869	down
FBgn0024232	gprs	84	41	53	13	17	18	0.505434	0.237355	0.358225	0.101307	0.118618	0.124323	3.97148e-06	1.87712e-05	-1.58769	down
FBgn0039435	TwdlP	2461	3467	3176	982	965	948	186.714	255.876	250.783	80.2775	82.255	74.1908	5.52718e-40	4.01031e-38	-1.58695	down
FBgn0087008	e(y)3	1816	1066	1400	448	482	422	8.00071	4.64391	7.08144	2.31581	2.74017	2.32913	2.70891e-19	7.22112e-18	-1.58012	down
FBgn0040234	c12.2	1099	759	960	291	286	319	7.64525	5.10286	7.10106	2.44652	2.47102	2.61435	1.95599e-23	6.65523e-22	-1.57825	down
FBgn0024836	stan	381	203	246	90	64	99	1.14784	0.588779	0.795498	0.313144	0.219522	0.331585	1.01258e-10	1.05756e-09	-1.57423	down
FBgn0036594	CG13047	96	91	116	39	27	24	12.5773	11.8716	15.7448	5.72414	4.16617	3.59498	3.75464e-09	3.16186e-08	-1.57326	down
FBgn0032068	LManV	2563	2202	2195	767	718	766	30.6677	25.0766	28.6712	10.5673	10.0815	10.1776	6.71263e-41	5.07197e-39	-1.57177	down
FBgn0038344	obe	959	615	663	236	227	247	5.36286	3.29364	3.89594	1.48879	1.45793	1.53372	1.86426e-18	4.65258e-17	-1.57016	down
FBgn0034240	MESR4	809	423	561	205	186	173	3.54851	1.7645	2.60859	1.0017	0.936473	0.82957	7.21489e-14	1.14125e-12	-1.56301	down
FBgn0003189	r	3504	2159	2681	809	934	956	19.9579	13.0055	17.2489	6.93407	8.38978	7.9408	5.8642e-21	1.70873e-19	-1.55272	down
FBgn0052248	CG32248	41	22	41	11	6	9	5.67949	3.00548	5.74471	1.77548	0.992491	1.51166	8.1562e-05	0.000293559	-1.55245	down
FBgn0263109	CG43366	59	17	29	9	11	4	0.24426	0.0699679	0.129723	0.0444635	0.052558	0.0225468	0.000277427	0.000884345	-1.54959	down
FBgn0051233	CG31233	10487	7139	7879	2764	2879	2709	143.198	92.7307	114.265	42.6316	45.228	40.8808	1.42682e-26	6.0124e-25	-1.5456	down
FBgn0002431	hyd	3577	2128	2699	942	876	926	17.5989	9.96593	13.8013	4.96598	4.65059	4.82751	3.86878e-20	1.08128e-18	-1.53861	down
FBgn0041156	exex	269	156	167	51	54	79	4.3804	2.52695	2.8479	0.952985	1.1469	1.49047	1.43184e-09	1.28059e-08	-1.53677	down
FBgn0263705	Myo10A	1578	798	1093	365	393	365	4.85406	2.37841	3.45597	1.31548	1.45518	1.30445	1.53357e-14	2.60089e-13	-1.53167	down
FBgn0002917	na	104	77	76	30	26	22	0.527279	0.378397	0.402911	0.18718	0.162008	0.133147	6.04052e-08	4.13366e-07	-1.53054	down
FBgn0261671	tweek	1934	1067	1295	490	462	448	4.76989	2.46342	3.00565	2.16094	1.14648	2.08791	3.39422e-16	6.91209e-15	-1.53003	down
FBgn0000247	ca	1012	645	708	247	272	255	5.22698	3.21048	3.83391	1.50303	1.66338	1.55823	7.78454e-18	1.86111e-16	-1.52856	down
FBgn0261360	CG42637	181	77	106	44	41	23	1.10467	0.451465	0.692751	0.305196	0.281939	0.157072	1.05593e-06	5.61046e-06	-1.52622	down
FBgn0267350	PI4KIIIalpha	3432	1876	2525	776	903	900	18.7922	9.9069	14.8046	5.01189	5.97849	5.59985	7.27302e-17	1.60006e-15	-1.51919	down
FBgn0033194	Vps13	3168	1618	2233	793	764	757	12.4778	6.03394	9.3527	3.44072	3.33915	3.19953	1.89957e-15	3.55756e-14	-1.51269	down
FBgn0039536	unc80	126	73	87	39	22	26	0.407861	0.232622	0.300249	0.151555	0.0896266	0.100354	3.84865e-07	2.25124e-06	-1.51076	down
FBgn0037541	CG2747	1788	1128	1278	462	425	508	10.8943	6.58063	8.1546	3.15241	2.93092	3.40145	1.17877e-18	2.97572e-17	-1.50996	down
FBgn0033159	Dscam1	588	290	373	122	133	150	2.24728	1.07431	1.4744	0.528019	0.563072	0.612295	3.74207e-11	4.16648e-10	-1.50885	down
FBgn0033913	CG8468	4045	3340	3705	1194	1297	1271	43.1256	34.1596	41.7755	14.7353	16.3983	15.3818	3.14047e-39	2.19153e-37	-1.50524	down
FBgn0033590	CG13217	78	110	112	34	26	34	14.3886	19.7995	21.8485	6.51806	5.20952	6.25202	1.00839e-08	7.91964e-08	-1.50368	down
FBgn0038132	apn	424	506	472	124	174	170	29.467	34.1302	33.0883	9.66731	13.8174	13.1696	3.34343e-21	9.90017e-20	-1.50246	down
FBgn0031688	Cyp28d2	11877	6861	8359	3077	2900	3108	61.1259	61.2417	66.4393	48.85	46.8335	50.3389	7.31554e-19	1.87703e-17	-1.50144	down
FBgn0011722	Tig	19397	11823	14378	5232	5020	5101	70.591	41.4172	56.7179	23.2609	22.8854	22.028	3.34002e-21	9.90017e-20	-1.5005	down
FBgn0266557	kis	4950	2655	3090	1106	1105	1123	13.1666	7.35134	8.98799	3.87871	3.81367	4.06295	1.34678e-07	8.67448e-07	-1.50038	down
FBgn0011230	poe	5169	2683	3287	1187	1112	1162	13.5468	6.69359	9.00779	3.38929	3.19582	3.27474	2.31694e-07	1.41733e-06	-1.49841	down
FBgn0038290	CG6912	1657	1609	1591	527	556	577	40.7594	37.487	43.7995	13.8207	14.4026	14.8389	4.52299e-45	3.78274e-43	-1.49539	down
FBgn0003277	RpII215	2089	1091	1392	518	501	506	11.5776	5.76156	8.11841	3.26634	3.22573	3.13772	9.07172e-15	1.57512e-13	-1.49488	down
FBgn0261885	osa	3051	1497	2107	785	713	720	9.8229	4.83201	7.13683	2.88134	2.84462	2.66823	3.66717e-14	5.96992e-13	-1.49335	down
FBgn0031170	ABCA	6760	4222	4937	1823	1769	1799	51.2362	30.5393	39.2704	15.0452	14.6241	14.6245	4.2532e-21	1.24928e-19	-1.49241	down
FBgn0036374	Spt20	524	316	380	172	101	129	2.21034	1.26561	1.64074	0.830701	0.486227	0.619356	1.56276e-11	1.84899e-10	-1.48746	down
FBgn0261710	nocte	4525	2612	3258	1149	1221	1160	13.8635	7.90123	10.4515	4.22369	4.68567	4.24835	4.93535e-18	1.19364e-16	-1.48231	down
FBgn0262392	mir-1004	131	146	149	54	29	55	1.90703	2.25421	2.57676	1.05498	0.409275	0.822454	9.81959e-10	8.94293e-09	-1.48214	down
FBgn0052694	CG32694	762	629	675	229	223	255	18.1388	16.2701	17.269	7.79216	6.81069	8.13009	4.59913e-25	1.76182e-23	-1.48045	down
FBgn0267033	mamo	472	236	318	125	118	95	1.67262	0.76957	1.22931	0.487764	0.448438	0.360194	2.00177e-10	2.01946e-09	-1.48028	down
FBgn0034166	CG6472	45	38	28	12	8	11	1.4152	1.1618	0.909891	0.442947	0.312073	0.380939	7.64095e-05	0.00027665	-1.47716	down
FBgn0010825	Gug	1272	787	969	363	329	340	4.62851	2.81274	3.64806	1.5397	1.42408	1.45348	1.38861e-17	3.27959e-16	-1.47469	down
FBgn0260970	Ubr3	2291	1500	1642	599	636	628	9.86248	6.16299	7.39608	2.92481	3.12969	3.01139	4.02427e-20	1.12188e-18	-1.4733	down
FBgn0261617	nej	1694	1047	1226	494	456	407	3.50367	2.07969	2.73763	1.18101	1.07963	1.02489	3.31569e-17	7.59973e-16	-1.4692	down
FBgn0004367	mei-41	219	136	181	64	49	65	1.17527	0.706703	1.02226	0.389422	0.303111	0.389738	4.86217e-10	4.69339e-09	-1.46293	down
FBgn0262717	Skeletor	1664	1210	1251	489	513	426	15.3846	13.2224	15.018	9.39392	9.37333	7.57817	1.60622e-21	4.87473e-20	-1.4619	down
FBgn0266638	asRNA:CR45145	135	117	102	43	38	36	5.47941	4.63394	4.37065	1.98096	1.78164	1.58968	2.14586e-09	1.87331e-08	-1.45832	down
FBgn0005624	Psc	246	161	204	71	72	63	1.36028	0.854929	1.12878	0.413475	0.475598	0.388076	2.10983e-11	2.43832e-10	-1.45678	down
FBgn0263620	asRNA:CR43629	222	121	165	57	58	54	8.89314	6.81097	6.36124	3.56738	3.5165	2.33014	4.06898e-09	3.41608e-08	-1.45188	down
FBgn0054054	CG34054	157	201	190	48	64	73	21.0525	25.6499	27.9864	6.8972	9.4899	9.64125	5.98354e-12	7.51786e-11	-1.45187	down
FBgn0083956	CG34120	1231	831	977	359	368	332	7.55095	5.24019	6.38356	2.44821	2.70752	2.22626	1.34987e-19	3.65165e-18	-1.44961	down
FBgn0035106	rno	874	474	503	202	205	226	2.47333	1.2772	1.50305	0.633571	0.646565	0.690567	8.58399e-12	1.04962e-10	-1.44707	down
FBgn0061200	Nup153	2055	1250	1324	568	562	478	8.75302	5.10195	5.88851	2.72561	2.74226	2.26104	1.34599e-15	2.5781e-14	-1.44486	down
FBgn0261383	IntS6	470	344	415	124	143	161	2.84503	2.04582	2.68004	0.883551	1.08292	1.14067	4.58132e-16	9.24364e-15	-1.43899	down
FBgn0266083	ocm	559	377	373	164	148	142	2.80688	1.81822	1.96097	0.945188	0.848288	0.800378	5.29165e-14	8.50078e-13	-1.43834	down
FBgn0039178	CG6356	1013	865	933	310	358	329	17.3303	14.2144	16.594	5.76675	6.73334	6.03675	4.76702e-28	2.16711e-26	-1.43506	down
FBgn0016031	lama	2772	2246	2460	879	868	919	33.0948	25.7044	31.3794	11.7756	12.0247	12.1441	9.58707e-33	5.35897e-31	-1.43281	down
FBgn0011785	BRWD3	1277	726	913	326	322	371	5.39534	2.94607	4.10322	1.61921	1.63625	1.80582	2.02567e-14	3.39865e-13	-1.43248	down
FBgn0286831	sov	874	560	572	211	253	238	2.85696	1.7385	1.97634	0.76561	0.934297	0.842636	1.83851e-14	3.09888e-13	-1.43012	down
FBgn0050377	CG30377	333	211	232	92	82	94	2.62681	1.61399	1.90982	0.84725	0.768471	0.852815	2.10654e-11	2.43709e-10	-1.42868	down
FBgn0033079	Fmo-2	1396	1366	1490	491	485	545	29.3168	27.2441	33.8237	12.0979	12.0961	12.952	5.71561e-38	3.86545e-36	-1.42814	down
FBgn0259224	CG42324	779	557	685	253	221	242	7.45159	5.34809	7.28572	4.28013	3.14847	2.3397	5.5746e-19	1.45072e-17	-1.42477	down
FBgn0030612	CG5599	684	676	636	220	247	246	16.6767	15.8024	16.4868	6.07503	6.95528	6.61371	6.22931e-28	2.77432e-26	-1.42346	down
FBgn0027655	htt	1264	686	860	363	345	278	4.43519	2.28079	2.86661	2.08878	1.64812	1.01043	1.26686e-12	1.73063e-11	-1.41922	down
FBgn0037565	CG9626	337	177	188	79	77	84	2.01223	1.02293	1.22659	0.562712	0.532424	0.566849	8.24701e-09	6.59039e-08	-1.41864	down
FBgn0036004	Jarid2	1031	618	690	311	256	263	3.945	2.26321	2.78946	1.35565	1.12706	1.12292	1.21544e-13	1.88192e-12	-1.40902	down
FBgn0039302	Nup358	3174	1911	2352	889	895	884	13.9835	8.06916	10.9465	4.36827	4.4344	4.26139	2.26323e-17	5.25339e-16	-1.40773	down
FBgn0034641	mahj	1310	951	1032	426	404	355	8.9827	6.21458	7.45136	3.24526	3.23191	2.69293	4.92204e-20	1.36176e-18	-1.40696	down
FBgn0014396	tim	206	192	128	76	57	48	1.58138	1.2232	0.930935	0.589381	0.44238	0.37481	6.16632e-09	5.03414e-08	-1.4059	down
FBgn0037630	Ir85a	43	45	23	10	6	16	0.998272	1.00435	0.574109	0.26832	0.156965	0.396539	0.00034189	0.00106899	-1.39883	down
FBgn0037344	CG2926	1535	881	1248	413	472	431	5.79743	3.17972	4.9408	1.77158	2.05352	1.81578	7.20496e-15	1.26098e-13	-1.39818	down
Trans_newGene_25	-	153	153	128	63	54	33	10.8169	10.4903	9.34282	4.89508	4.26947	2.50614	7.66131e-09	6.15376e-08	-1.39788	down
FBgn0032701	CG10341	300	200	205	95	69	84	5.58314	3.53879	4.09646	1.99178	1.47779	1.69807	2.0897e-10	2.10044e-09	-1.39779	down
FBgn0030615	Cyp4s3	3409	3593	3658	1290	1312	1320	65.214	66.647	75.2659	28.952	29.8224	28.7764	2.02776e-56	2.44134e-54	-1.39413	down
FBgn0031051	Ranbp21	1088	755	888	342	332	319	7.41905	4.85455	6.26287	2.74836	2.61659	2.42712	5.71282e-19	1.48317e-17	-1.39124	down
FBgn0040606	CG6503	128	131	152	45	29	67	83.6014	89.5122	92.4442	28.6918	18.0139	38.3245	7.01645e-08	4.7452e-07	-1.39124	down
FBgn0023531	CG32809	204	165	174	69	50	73	1.04065	0.765476	0.930006	0.376195	0.281859	0.394339	1.02365e-10	1.06506e-09	-1.39088	down
FBgn0031981	Megf8	602	366	405	153	146	192	2.73361	1.59034	1.90134	0.767453	0.735296	0.936384	8.83098e-12	1.07742e-10	-1.38909	down
FBgn0036147	Plod	2618	2114	2286	881	839	864	44.821	34.2747	41.8982	16.9778	16.3875	16.2183	3.51509e-30	1.73475e-28	-1.38663	down
FBgn0050085	Rif1	586	478	459	157	197	200	4.63922	3.64672	3.81526	1.42024	1.82908	1.77988	4.43029e-17	9.9873e-16	-1.38471	down
FBgn0040950	Muc26B	547	329	447	171	156	150	9.37633	5.15722	8.61567	3.49088	3.24979	2.94673	9.30003e-13	1.29798e-11	-1.38302	down
FBgn0261930	vnd	80	142	71	42	34	21	1.0312	1.77056	0.938882	0.615741	0.513981	0.305428	5.944e-06	2.72362e-05	-1.38017	down
FBgn0052654	Sec16	2327	1502	1812	623	762	684	10.2505	6.42323	8.36004	3.13523	3.91857	3.39474	1.96208e-17	4.58349e-16	-1.37777	down
FBgn0262249	mir-958	66	37	42	18	12	16	1.06106	0.571382	0.715421	0.302943	0.217487	0.269046	8.29965e-05	0.000297841	-1.37702	down
FBgn0036836	CG11619	76	58	55	20	26	17	1.04752	0.973527	0.928808	0.322886	0.490273	0.250872	8.524e-06	3.78093e-05	-1.37528	down
FBgn0034624	CG17974	711	1041	963	321	333	342	40.4558	56.77	57.1978	19.516	20.2782	20.5288	3.16318e-22	9.95856e-21	-1.37477	down
FBgn0030600	hiw	1418	1031	984	436	467	357	5.236	3.84643	3.95663	2.00478	2.18823	1.64549	1.87234e-16	3.95248e-15	-1.37339	down
FBgn0033365	CG8170	87	56	77	36	18	19	0.801432	0.508781	0.727844	0.386495	0.194351	0.214562	1.29993e-05	5.54167e-05	-1.37326	down
FBgn0034710	Alp7	141	132	117	40	31	65	2.99965	2.72487	2.68337	1.01889	0.809962	1.62446	1.08755e-07	7.10082e-07	-1.37176	down
FBgn0264386	Ca-alpha1T	169	121	129	38	42	67	0.468572	0.324308	0.368076	0.130052	0.136414	0.273582	7.38344e-08	4.96276e-07	-1.37052	down
FBgn0086450	su(r)	7078	5888	6613	2440	2501	2374	76.6778	62.1714	75.0204	31.4144	32.9832	30.0145	6.30756e-36	4.01777e-34	-1.36949	down
FBgn0031377	CG15356	315	262	220	110	70	108	2.26374	1.81933	1.65533	0.922184	0.605583	0.892515	1.31315e-10	1.34709e-09	-1.36412	down
FBgn0032305	CG6700	958	735	714	298	333	260	9.72384	7.08729	7.5295	3.26451	3.62735	2.78168	2.02904e-17	4.72983e-16	-1.36351	down
FBgn0262972	lncRNA:cherub	1007	531	599	281	199	293	6.91064	3.64301	4.11733	2.06881	1.47084	2.2242	6.67851e-10	6.29147e-09	-1.36344	down
FBgn0051019	CG31019	55	77	60	23	18	24	1.19821	1.60496	1.36997	0.578371	0.479022	0.603488	5.53218e-06	2.5488e-05	-1.36037	down
FBgn0004427	LysD	36	38	34	10	12	12	7.63817	7.83489	7.44464	2.34837	2.91119	2.62248	0.00015863	0.000533768	-1.36018	down
FBgn0051051	CG31051	34	34	35	13	8	11	1.56839	1.5147	1.71906	0.717529	0.467705	0.565405	0.000226184	0.000736424	-1.35921	down
FBgn0051663	CG31663	415	356	313	145	136	119	4.43771	3.76895	3.52234	1.8044	1.77463	1.60287	6.08281e-15	1.07837e-13	-1.35881	down
FBgn0033458	CG18446	427	369	418	177	146	126	9.91866	8.24143	9.91651	4.37569	3.65032	3.11837	4.62618e-16	9.31698e-15	-1.35789	down
FBgn0259246	brp	134	74	78	28	44	26	0.356904	0.175183	0.205186	0.0993117	0.154068	0.0755419	7.61676e-06	3.41166e-05	-1.35374	down
FBgn0031289	CG13950	174	136	204	58	49	78	4.39891	2.86049	5.17344	1.68234	1.57473	2.47155	6.95866e-09	5.61407e-08	-1.35149	down
FBgn0046874	Pif1B	10891	7675	7897	3258	3219	3475	47.8594	33.6151	37.0834	21.1409	21.8193	22.7035	5.2693e-21	1.5436e-19	-1.35075	down
FBgn0035612	frm	13562	7918	9792	3892	3936	3880	143.917	83.5386	101.803	45.5553	46.1694	44.1301	3.99891e-16	8.0834e-15	-1.34883	down
FBgn0263413	lncRNA:CR43459	215	153	183	65	85	50	2.63627	1.67919	2.2928	0.73296	0.968827	0.624985	5.23527e-09	4.3191e-08	-1.3454	down
FBgn0031857	LUBEL	502	367	408	170	141	166	3.88735	5.02095	4.5201	3.24719	2.45834	1.98598	1.06068e-14	1.83005e-13	-1.34344	down
FBgn0005632	faf	3902	2302	2510	1051	1098	1116	16.3142	9.1262	11.057	4.83726	5.14244	5.0752	1.87397e-14	3.1538e-13	-1.34323	down
FBgn0016977	spen	1257	691	858	313	337	393	2.32165	1.2039	1.66827	0.611419	0.632485	0.734188	7.04667e-12	8.75321e-11	-1.34243	down
FBgn0004512	Mdr49	1626	1305	1381	523	568	546	13.4338	10.4152	12.3756	5.20142	5.80519	5.36261	3.85115e-25	1.48046e-23	-1.3405	down
FBgn0263219	Dscam4	39	53	39	15	12	16	0.184853	0.245288	0.193315	0.0915127	0.0676424	0.0828108	8.63402e-05	0.000308326	-1.34013	down
FBgn0052072	Elo68alpha	67	95	72	27	36	18	6.21691	8.58585	6.85925	2.69247	3.54921	1.7997	4.90341e-06	2.28215e-05	-1.33948	down
FBgn0036824	CG3902	6106	5502	5529	2171	2131	2252	141.444	122.957	137.997	60.1775	61.1439	60.6411	3.65629e-40	2.70665e-38	-1.33799	down
FBgn0028573	prc	3238	1782	2423	909	946	943	13.5051	7.15717	10.6361	4.50203	4.75401	4.55093	5.83509e-14	9.30557e-13	-1.33685	down
FBgn0023479	teq	6493	3995	4738	1818	1908	2042	47.254	29.8112	38.5172	20.1687	19.035	21.7509	1.68258e-16	3.57255e-15	-1.33366	down
FBgn0052564	CG32564	1299	824	1038	377	396	422	51.874	32.2396	42.922	17.5476	19.0881	19.2404	1.41203e-15	2.69516e-14	-1.33265	down
FBgn0266737	asRNA:CR45210	29	22	35	7	8	11	2.093	1.52882	2.62055	0.568103	0.665012	0.841029	0.000757586	0.00216487	-1.33192	down
FBgn0038693	unc79	83	45	53	15	27	19	0.348189	0.186814	0.238262	0.0726186	0.127765	0.0982381	6.87175e-05	0.000251712	-1.33006	down
FBgn0005659	Ets98B	413	387	365	167	121	152	5.16579	4.69534	4.63383	2.50253	1.97566	2.21308	7.45435e-16	1.47153e-14	-1.32931	down
FBgn0001330	kz	455	358	279	154	119	135	4.4486	3.37012	2.86214	1.67376	1.33551	1.46386	3.03078e-11	3.43384e-10	-1.32822	down
FBgn0085430	CG34401	918	474	649	261	246	258	2.6777	1.35516	2.03133	0.886089	0.862184	0.88045	6.59846e-11	7.11543e-10	-1.32632	down
FBgn0000581	E(Pc)	1712	973	1226	505	475	500	5.60596	3.04792	4.23964	1.90516	1.79746	1.82405	2.25048e-13	3.34096e-12	-1.32576	down
FBgn0262536	CG43090	46	26	49	15	17	6	7.5334	4.02147	7.84241	2.39296	2.6164	0.914693	0.00051206	0.0015274	-1.3251	down
FBgn0031001	CG7884	45	33	40	13	14	12	0.365387	0.25104	0.334022	0.134718	0.147657	0.120425	0.000180444	0.000598838	-1.31908	down
FBgn0038291	CG3984	4254	3342	3522	1513	1494	1284	138.314	103.948	119.939	51.2656	54.241	45.2458	5.27264e-24	1.86948e-22	-1.31725	down
FBgn0053526	PNUTS	2791	2654	2479	1017	955	1099	37.2133	34.6401	35.2463	13.0856	12.369	13.4105	2.92476e-33	1.66894e-31	-1.31577	down
FBgn0022764	Sin3A	2629	1762	1932	854	771	806	11.487	7.37368	8.85042	4.2487	3.88337	3.91559	2.60071e-17	6.02398e-16	-1.31463	down
FBgn0037230	Nepl11	743	668	747	252	254	325	13.5374	11.7385	14.0486	5.21437	5.39946	6.63891	4.38372e-20	1.21899e-18	-1.31247	down
FBgn0017561	Ork1	321	230	322	105	123	103	2.81415	1.96931	2.93414	1.0861	1.28608	1.05127	7.59527e-12	9.38148e-11	-1.31158	down
FBgn0083124	Uhg4	1076	1542	1368	567	519	446	214.84	290.981	279.735	105.353	98.4459	82.3401	9.93187e-21	2.86351e-19	-1.30982	down
FBgn0260938	tay	1289	789	897	380	350	410	5.96517	3.51277	4.30406	1.93667	1.8164	2.03617	2.51483e-13	3.70329e-12	-1.30866	down
Trans_newGene_271	-	605	570	597	227	230	230	12.1207	11.166	12.7843	4.87298	5.11721	5.6398	8.05208e-24	2.83661e-22	-1.30758	down
FBgn0267761	asRNA:CR46092	171	143	107	60	49	47	8.32807	6.866	5.48946	3.33978	2.78979	2.57343	7.33969e-08	4.93765e-07	-1.30666	down
FBgn0039709	Cad99C	1288	843	958	338	421	429	6.19629	3.88519	5.01795	1.98028	2.52791	2.42904	3.00215e-14	4.92389e-13	-1.30639	down
FBgn0002441	l(3)mbt	709	526	485	257	197	205	4.53627	3.22119	3.40469	1.84768	1.58254	1.58385	4.10313e-13	5.9306e-12	-1.30555	down
FBgn0004782	Ccp84Ab	245	163	157	81	73	57	14.7963	9.46227	10.0792	5.70871	5.40197	3.9651	2.68807e-08	1.96206e-07	-1.30542	down
FBgn0052425	CG32425	4661	4896	4904	1934	1809	1922	161.982	170.025	179.819	70.9876	67.9321	67.6101	3.41846e-50	3.46784e-48	-1.30452	down
FBgn0015589	Apc	1065	569	792	336	303	289	4.08282	2.12453	3.51111	1.73048	1.76833	1.61294	3.27384e-11	3.67879e-10	-1.30188	down
FBgn0032618	CG31743	1128	1279	1244	463	511	452	33.0708	36.4919	38.7977	14.7255	16.0068	13.8396	2.89907e-32	1.6123e-30	-1.30155	down
FBgn0043043	Desat2	20	30	34	7	8	11	0.864501	1.19854	1.4876	0.340752	0.406306	0.503923	0.00110126	0.0030415	-1.29605	down
FBgn0027835	Dp1	28202	18927	20887	8914	8738	8962	175.167	113.042	139.181	64.2142	63.6248	62.7108	5.84635e-19	1.51425e-17	-1.29448	down
FBgn0035308	CG15822	4477	2719	3163	1393	1339	1307	15.7271	9.49558	12.4834	6.00644	5.69901	5.26403	5.70092e-15	1.01395e-13	-1.29173	down
FBgn0003068	per	25	27	31	7	12	7	0.145074	0.151211	0.190256	0.0527613	0.091091	0.0517009	0.00106644	0.00295265	-1.29161	down
FBgn0023510	Rbcn-3B	1190	692	828	325	369	357	6.61529	3.69714	4.90864	2.13545	2.4095	2.24285	3.18153e-12	4.12995e-11	-1.28931	down
FBgn0045035	tefu	689	515	537	212	230	238	4.18498	2.98533	3.39952	1.3476	1.45416	1.48942	8.8733e-16	1.74222e-14	-1.28828	down
FBgn0032472	CG9928	183	222	231	82	80	83	59.3342	69.9521	75.1413	26.2776	26.5784	25.0787	3.18675e-12	4.13184e-11	-1.28732	down
FBgn0085451	htk	1756	1037	1337	556	501	555	6.19699	3.25955	5.03276	2.42775	2.17778	2.28765	1.64585e-13	2.48374e-12	-1.28528	down
FBgn0039633	CG11873	609	403	486	215	192	176	1.59235	1.01547	1.33997	0.641257	0.572061	0.511796	8.88227e-13	1.24284e-11	-1.28438	down
FBgn0005674	GluProRS	2682	1733	1857	749	838	872	22.272	14.5729	16.5185	7.63213	9.00907	8.85001	6.69432e-15	1.17537e-13	-1.2838	down
FBgn0032395	Wdr81	417	290	289	130	138	118	2.5637	1.7152	1.87121	0.91256	0.97947	0.810348	3.17917e-11	3.57607e-10	-1.28278	down
FBgn0264947	asRNA:CR44116	252	253	170	95	108	51	5.45247	5.2289	3.75212	2.14198	2.4347	1.15922	1.69629e-07	1.07178e-06	-1.28216	down
FBgn0004656	fs(1)h	2042	1186	1416	589	570	659	7.8017	4.3448	5.58369	2.4924	2.36227	2.76863	1.00359e-12	1.38842e-11	-1.27941	down
FBgn0014343	mirr	366	189	334	107	108	125	3.70735	1.85916	3.53785	1.20237	1.31442	1.41425	2.06153e-08	1.53647e-07	-1.27899	down
FBgn0031869	CG18304	480	315	361	134	150	166	1.87345	1.1861	1.53327	0.630755	0.723863	0.760367	1.90926e-11	2.22057e-10	-1.27861	down
FBgn0085421	Epac	545	416	550	204	192	198	4.63366	3.3566	5.02222	2.01868	2.03255	1.92986	1.07468e-15	2.07292e-14	-1.27764	down
FBgn0028341	Ptpmeg2	7695	6112	6911	2780	2782	2708	141.777	108.262	135.803	50.4546	51.9303	47.4888	5.05025e-28	2.27698e-26	-1.27394	down
FBgn0266202	asRNA:CR44897	110	70	96	34	24	44	3.54016	2.19701	3.27008	1.27869	0.963531	1.64313	8.26142e-06	3.67487e-05	-1.27133	down
FBgn0038063	Octbeta2R	456	405	421	169	167	172	4.726	4.27393	4.86547	2.02938	2.04376	2.14623	5.12573e-18	1.23695e-16	-1.2708	down
FBgn0267348	LanB2	4606	2915	3239	1381	1401	1484	23.748	14.4608	18.0209	8.44855	8.76586	8.84909	2.56003e-15	4.77814e-14	-1.27027	down
FBgn0052677	X11Lbeta	81	66	87	27	43	14	0.275698	0.21071	0.307826	0.112749	0.173229	0.0602204	5.96707e-05	0.000221236	-1.26994	down
FBgn0034087	clu	2608	1644	1984	828	783	864	15.9757	9.58876	13.0985	5.79912	5.63305	5.94487	3.59514e-15	6.59772e-14	-1.26785	down
FBgn0037098	Wnk	1506	903	1153	452	472	485	6.2706	3.57669	5.05685	2.07437	2.19868	2.18949	2.04724e-13	3.04749e-12	-1.26744	down
FBgn0015569	alpha-Est10	742	676	742	298	266	298	16.5452	14.5049	17.3095	7.21966	6.40199	6.99448	1.03662e-22	3.34036e-21	-1.26713	down
FBgn0035317	Oseg2	839	672	800	327	307	287	6.87408	5.24067	7.08162	3.15081	3.03321	2.68256	2.74522e-19	7.30015e-18	-1.26627	down
FBgn0030486	Set2	1039	720	765	318	340	344	3.69909	2.47798	2.88828	1.34041	1.461	1.4136	5.55771e-15	9.90085e-14	-1.26602	down
FBgn0005666	bt	11427	6462	7749	3429	3345	3400	65.5856	49.1898	54.2685	41.0722	40.096	42.8136	2.70872e-13	3.97279e-12	-1.26451	down
FBgn0045800	Uhg1	898	881	784	338	327	362	96.4154	89.3281	81.5844	31.2141	29.1677	33.5055	8.20845e-24	2.86407e-22	-1.2626	down
FBgn0039151	CG13607	5132	5517	5642	2152	2256	2166	96.3936	100.465	111.703	47.0869	50.2204	46.8188	6.95367e-49	6.68284e-47	-1.26212	down
FBgn0250788	beta-Spec	12345	7131	8241	3919	3645	3454	39.5578	22.0243	29.1673	15.638	14.9717	13.2853	3.00232e-13	4.37994e-12	-1.26192	down
FBgn0263873	sick	804	518	613	257	262	249	5.08949	2.86682	3.85355	1.98992	2.04125	1.6369	3.57518e-13	5.18118e-12	-1.26119	down
FBgn0284247	ds	878	417	628	251	253	249	2.76729	1.27081	2.12424	0.88337	0.897901	0.85495	3.75027e-09	3.16061e-08	-1.26007	down
FBgn0011829	Ret	185	96	122	65	33	53	2.03668	1.01824	1.41623	0.784015	0.399799	0.623412	9.91735e-06	4.33924e-05	-1.25779	down
FBgn0031118	RhoGAP19D	774	544	702	273	291	243	3.10994	2.03718	2.95111	1.24022	1.38814	1.1688	1.22986e-14	2.10866e-13	-1.25523	down
FBgn0030539	CG1368	933	896	991	426	369	341	78.117	73.5018	84.3067	39.6487	36.3491	31.7063	7.14055e-23	2.35638e-21	-1.25362	down
FBgn0030482	CG1673	1586	1506	1579	628	633	632	30.256	27.5798	30.903	13.2409	13.6017	13.558	1.59931e-33	9.2709e-32	-1.2532	down
FBgn0016641	PTP-ER	576	430	420	191	189	191	3.97677	2.84014	3.0826	1.5094	1.50984	1.4743	1.32264e-13	2.03523e-12	-1.24953	down
FBgn0085436	Not1	6080	3218	3878	1682	1640	1663	24.9808	12.6778	16.6709	7.55554	7.45383	7.36302	1.13478e-05	4.91449e-05	-1.24774	down
FBgn0264678	lncRNA:CR43963	1578	723	1017	397	427	402	8.5601	2.2245	5.80763	1.74777	3.79768	2.44485	6.98254e-05	0.000255172	-1.24688	down
FBgn0051973	Cda5	316	193	270	90	83	132	2.71845	1.75542	2.50547	0.976159	0.873685	1.30908	3.96594e-08	2.80147e-07	-1.24673	down
FBgn0030897	Frq1	54	27	62	14	19	17	0.592207	0.265577	0.65095	0.143925	0.189951	0.180407	0.000464588	0.00140337	-1.2467	down
FBgn0016122	Acer	2331	2179	2558	962	985	930	40.9145	36.2537	46.816	18.099	19.1038	17.7837	1.32139e-31	7.02772e-30	-1.24592	down
FBgn0085434	NaCP60E	182	105	90	58	43	42	0.67647	0.337685	0.357733	0.230961	0.174024	0.166458	1.05202e-05	4.58104e-05	-1.24468	down
FBgn0026060	Mipp2	1309	871	1021	480	401	410	9.72226	6.89719	7.4285	5.90197	4.65341	4.74333	3.934e-14	6.36646e-13	-1.24273	down
FBgn0032593	Trpgamma	93	88	84	38	33	31	0.730072	0.663993	0.704563	0.33443	0.290795	0.266898	1.18166e-06	6.18973e-06	-1.24181	down
FBgn0052133	Ptip	385	242	245	128	121	96	1.45652	0.872134	0.97588	0.552134	0.528024	0.40763	1.05177e-08	8.23675e-08	-1.24101	down
FBgn0083977	CG34141	309	261	264	107	110	118	4.16071	3.44753	3.82387	1.6714	1.7776	1.84202	8.06374e-13	1.1341e-11	-1.24042	down
FBgn0030594	fiz	2024	1953	1842	756	817	807	39.862	37.1272	38.1932	16.3194	17.8454	17.0639	6.1577e-32	3.3564e-30	-1.24003	down
FBgn0035695	CG10226	190	164	161	69	64	72	2.14836	1.66182	1.89019	0.794926	0.76323	0.912446	9.45589e-10	8.64764e-09	-1.23654	down
FBgn0264326	DNApol-epsilon255	417	248	304	88	139	156	2.21452	1.26782	1.72972	0.538205	0.859762	0.929974	7.44909e-08	5.00382e-07	-1.23413	down
FBgn0003977	vir	620	372	396	187	176	195	3.39417	1.96357	2.2965	1.22682	1.19523	1.25733	6.88048e-10	6.45398e-09	-1.23084	down
FBgn0050413	CG30413	134	149	105	53	50	50	20.3813	21.7135	17.2259	8.60496	8.57336	7.64759	8.66983e-08	5.75047e-07	-1.22881	down
FBgn0036451	CG9425	1378	719	860	397	426	372	5.97559	2.9716	3.90258	1.94081	2.10232	1.79375	1.19696e-09	1.07756e-08	-1.22481	down
FBgn0038523	CG7587	772	1190	991	388	425	393	107.066	161.826	141.988	56.1819	63.0823	54.7592	3.72219e-17	8.51364e-16	-1.22163	down
FBgn0050081	Ir51b	25	22	41	6	14	9	1.19478	0.972137	1.9591	0.285699	0.663572	0.443435	0.00237661	0.00603152	-1.21979	down
FBgn0065080	snoRNA:Me18S-A1374	2365	1374	1600	720	747	720	8.70043	5.08325	6.78303	3.50344	3.81317	3.46443	5.59898e-12	7.0671e-11	-1.21793	down
FBgn0261938	mtRNApol	689	445	528	224	213	243	5.07433	3.14493	4.12895	1.90623	1.85788	2.00369	8.01858e-12	9.8932e-11	-1.21639	down
FBgn0036816	Indy	4483	3574	3676	1677	1580	1620	104.868	80.257	90.8775	43.2592	41.0361	40.9464	4.03007e-23	1.3544e-21	-1.21465	down
FBgn0033584	CG7737	471	517	442	202	215	172	9.18228	9.68442	9.2991	4.46176	4.75194	3.68449	1.05931e-16	2.29364e-15	-1.21423	down
FBgn0032919	CG9253	1850	1719	1693	785	725	680	52.8399	46.9958	50.7299	24.2796	22.7211	20.471	3.82991e-27	1.67174e-25	-1.21341	down
FBgn0000212	brm	1589	907	1234	506	506	520	8.30911	4.52525	6.98495	3.15998	3.20893	3.12286	9.15816e-12	1.11485e-10	-1.21272	down
FBgn0082831	pps	1079	760	832	370	374	360	4.75416	3.21	3.87583	1.88	1.93734	1.7968	6.2135e-15	1.09976e-13	-1.21187	down
FBgn0036646	CR18217	237	283	281	101	106	121	4.0826	4.6953	5.08583	1.95693	2.1112	2.31844	9.59497e-13	1.33404e-11	-1.21049	down
FBgn0036532	CG13445	274	435	355	169	124	139	65.5195	100.626	88.8687	41.8475	31.9947	32.0514	7.73531e-11	8.21202e-10	-1.2102	down
Trans_newGene_272	-	64	60	56	21	22	26	5.84877	5.49873	5.28645	2.1736	2.33968	2.64755	4.20013e-05	0.000160729	-1.20939	down
FBgn0264089	sli	886	511	568	271	264	270	3.2382	1.77945	2.16319	1.13235	1.17632	1.11751	4.78917e-10	4.63108e-09	-1.20859	down
FBgn0003891	tud	7132	4413	4987	2307	2201	2340	36.0873	21.2222	26.1928	12.3086	11.7723	12.3521	7.96725e-14	1.25777e-12	-1.20857	down
FBgn0030102	SmydA-9	434	390	492	181	190	173	7.23609	8.09248	9.87873	4.42839	4.04888	3.93638	1.72621e-15	3.26076e-14	-1.20817	down
FBgn0261954	east	1619	991	1107	534	476	526	5.56186	3.28394	4.04627	2.09452	1.90356	2.03583	6.27631e-12	7.85866e-11	-1.20544	down
Trans_newGene_84	-	75	53	66	31	16	27	2.24729	1.71163	2.02097	0.858734	0.514086	0.913312	9.77742e-05	0.000345277	-1.20299	down
FBgn0263397	Ih	536	528	506	203	208	243	8.54139	8.43735	8.89612	3.24755	3.85553	4.21084	4.37904e-18	1.06143e-16	-1.20244	down
FBgn0032798	CG10132	463	363	353	171	160	157	2.87799	2.18447	2.35351	1.30009	1.24644	1.16764	9.79165e-13	1.35966e-11	-1.20232	down
FBgn0034261	HPS4	481	449	416	191	177	193	6.30208	5.49974	5.60148	2.71694	2.56609	2.69503	2.03587e-16	4.27299e-15	-1.19973	down
FBgn0052808	CG32808	72	74	73	25	17	42	3.07652	3.0827	3.191	1.2401	0.881729	2.02557	7.36737e-05	0.000268073	-1.19941	down
FBgn0284221	Sema5c	610	450	578	227	247	207	5.63604	4.01065	5.53927	2.35366	2.60726	2.13429	1.13097e-13	1.75508e-12	-1.19907	down
FBgn0031264	CG11835	1310	951	1040	424	456	499	11.815	8.20887	10.1787	4.5918	5.05962	5.27471	1.6774e-15	3.17402e-14	-1.19856	down
FBgn0261963	mid	59	37	29	20	17	7	0.971645	0.609186	0.501988	0.395441	0.301045	0.145657	0.00161917	0.00430019	-1.19834	down
FBgn0053124	CG33124	36	34	45	17	12	13	1.23364	1.11127	1.57358	0.600833	0.441484	0.471553	0.000643039	0.00186885	-1.19706	down
FBgn0040336	Seipin	1749	1843	1926	787	799	741	34.3517	34.2728	39.5522	17.5646	18.3083	16.289	1.55658e-33	9.11972e-32	-1.19607	down
FBgn0039430	CG5455	1443	1354	1397	609	505	648	21.1419	19.0519	21.9089	10.1616	8.50584	10.4978	5.07757e-22	1.5849e-20	-1.19594	down
FBgn0035237	CG13917	1307	1022	947	480	435	458	4.73978	3.56963	3.66482	2.04116	1.88104	1.90634	9.0354e-16	1.77087e-14	-1.19423	down
FBgn0039500	CG5984	49	38	44	14	19	16	1.5486	1.19031	1.42964	0.546902	0.750689	0.586387	0.000360335	0.00111773	-1.19419	down
FBgn0262582	cic	1575	905	1098	514	435	537	5.7082	3.28697	4.03983	2.08509	1.81583	2.11287	1.24708e-10	1.28291e-09	-1.19383	down
FBgn0034975	enok	648	432	557	203	252	226	2.73186	1.74825	2.47002	0.96965	1.211	1.05194	9.22462e-12	1.1217e-10	-1.19377	down
FBgn0028371	jbug	4092	2677	3077	1331	1398	1405	20.5443	15.0866	17.2334	8.22188	9.66078	9.1521	5.71027e-15	1.01397e-13	-1.19239	down
FBgn0024510	dlt	11330	6994	8311	3742	3752	3698	36.7276	21.7871	29.4234	15.3127	15.7005	14.5609	4.75806e-14	7.66608e-13	-1.18998	down
FBgn0034859	CG3520	291	228	197	95	108	93	2.72782	2.05278	1.95864	1.0459	1.21151	0.997167	3.44984e-09	2.92996e-08	-1.18763	down
FBgn0028982	Spt6	3097	2150	2441	1073	1110	1062	15.01	9.97455	12.6142	6.16959	6.54173	5.95546	1.6161e-16	3.44475e-15	-1.18735	down
FBgn0038401	CG5916	280	298	280	105	138	115	6.47104	6.59217	6.76334	2.56145	3.39958	2.77058	1.29599e-12	1.76384e-11	-1.18725	down
FBgn0020645	Lcp65Aa	1421	2182	1842	767	753	765	283.493	429.541	379.04	160.41	163.292	154.047	1.27246e-18	3.19663e-17	-1.18692	down
FBgn0264001	bru3	91	42	50	21	19	29	0.731987	0.335267	0.507112	0.230469	0.185965	0.282889	0.000461453	0.00139467	-1.18643	down
FBgn0030588	CG9521	891	1029	1006	398	420	422	17.1269	18.9699	20.5177	8.65457	9.20685	8.9722	4.26883e-26	1.7783e-24	-1.18445	down
FBgn0261648	salm	102	89	131	48	41	41	0.555993	0.473388	0.747762	0.30659	0.262047	0.254244	1.8495e-06	9.32494e-06	-1.18337	down
FBgn0263006	SERCA	22497	14219	16866	7698	7296	7663	215.037	130.135	173.826	85.011	82.8152	82.5665	1.25081e-14	2.14122e-13	-1.18258	down
FBgn0038108	CG7518	1901	1163	1418	651	598	638	7.22336	4.21969	5.44385	2.81101	2.68196	2.77353	2.05482e-12	2.71892e-11	-1.18231	down
FBgn0260943	Rbp6	86	56	55	25	29	23	0.462552	0.331049	0.509723	0.366779	0.353859	0.166269	0.000104548	0.000367595	-1.1798	down
FBgn0039873	Smvt	640	556	546	220	268	250	19.0633	15.8883	17.2168	7.30818	8.98645	8.14958	4.89571e-16	9.82371e-15	-1.17825	down
FBgn0036157	CG7560	23	45	29	7	7	19	1.24727	2.37127	1.65436	0.437734	0.441908	1.13888	0.00338487	0.00823738	-1.178	down
FBgn0011723	byn	105	95	76	38	29	44	1.56619	1.38673	1.16453	0.657351	0.525832	0.762799	9.02805e-06	3.98675e-05	-1.1767	down
FBgn0261053	Cad86C	275	171	204	78	106	85	1.16573	0.684302	0.930341	0.383497	0.527289	0.405219	1.15453e-07	7.51132e-07	-1.17562	down
FBgn0037248	srl	911	831	807	373	340	375	9.57512	8.30922	8.67058	4.00734	3.64983	4.02458	1.08926e-20	3.12406e-19	-1.17361	down
FBgn0033250	CG14762	135	95	142	52	43	57	1.33882	0.90183	1.52044	0.598139	0.48887	0.622277	1.55931e-06	7.96817e-06	-1.1731	down
FBgn0000414	Dab	692	423	507	217	278	185	2.98761	1.74948	2.2917	1.05566	1.3956	0.897309	5.01092e-09	4.1465e-08	-1.17183	down
FBgn0039182	CG5728	871	722	781	346	291	375	6.46408	5.0911	6.1784	2.88675	2.43734	3.03138	4.9926e-16	9.99981e-15	-1.16994	down
FBgn0052656	Muc11A	7658	3644	4616	1962	2058	2210	67.0365	30.0081	43.4922	24.1581	26.0881	26.8511	0.000232106	0.000753915	-1.16916	down
FBgn0003415	skd	746	427	517	259	222	231	2.66692	1.44411	1.93311	1.03887	0.86647	0.885235	2.52473e-09	2.17803e-08	-1.16817	down
FBgn0035798	frac	863	495	665	282	303	270	8.37773	4.59337	6.85514	3.0128	3.2458	2.74094	4.6947e-10	4.55178e-09	-1.16787	down
FBgn0051224	CG31224	896	575	638	257	327	310	4.50419	2.73014	3.33205	1.41419	1.89231	1.67213	1.12718e-10	1.16834e-09	-1.16659	down
FBgn0034400	CG15099	1294	829	1099	467	463	443	5.75184	3.523	5.15814	2.3047	2.33061	2.14902	7.471e-13	1.0548e-11	-1.16641	down
FBgn0025620	CG13360	27608	30135	29248	12570	12275	12734	579.245	608.266	655.157	317.289	318.058	311.445	1.68799e-49	1.65122e-47	-1.16596	down
FBgn0040813	Nplp2	69416	98444	86597	36446	35921	36716	16810.5	22799	21427.7	8829.93	9067.44	8489.82	1.80089e-25	7.15097e-24	-1.16499	down
FBgn0261641	CG42724	1184	847	887	344	417	482	7.35447	5.17483	5.97137	2.57681	3.34971	3.72312	4.57977e-12	5.8412e-11	-1.16423	down
FBgn0260746	Ect3	442	413	486	193	199	181	9.02605	8.09995	10.3954	4.4268	4.61015	4.06545	7.38184e-16	1.45985e-14	-1.16422	down
FBgn0263005	CG43313	332	268	290	110	121	146	3.03959	2.35217	2.76317	1.13852	1.27459	1.48545	7.75575e-11	8.22575e-10	-1.16409	down
FBgn0051116	ClC-a	1278	961	924	440	478	437	13.8046	9.9558	10.4456	5.37128	5.92438	5.16715	1.82178e-14	3.07541e-13	-1.1628	down
FBgn0013680	mt:ND2	33496	46303	33100	15385	15217	17803	13859.4	18331.4	11974.2	4503.1	4122.84	5578.54	1.60463e-19	4.3232e-18	-1.16079	down
FBgn0025864	Crag	3105	1900	2236	1032	972	1095	15.1496	8.9671	11.6607	5.97285	5.82293	6.24207	3.10648e-12	4.04692e-11	-1.16055	down
FBgn0264675	lncRNA:CR43960	413	163	280	126	113	114	1.18442	0.680038	1.09258	0.628415	0.46393	0.393929	6.28724e-06	2.8594e-05	-1.1601	down
FBgn0265045	Strn-Mlck	1225	856	966	426	449	433	9.20799	7.14246	8.03936	4.36861	4.91326	5.18282	3.21545e-14	5.25799e-13	-1.15978	down
FBgn0051793	CG31793	488	374	386	191	164	178	5.05407	3.76875	4.26681	2.24515	1.93178	2.04747	4.08193e-12	5.22449e-11	-1.15917	down
FBgn0266377	Pde8	929	603	742	322	380	267	7.23853	4.10058	5.77701	2.53918	3.14684	2.40819	1.48919e-10	1.51491e-09	-1.15842	down
FBgn0035918	Cdc6	246	235	220	106	100	93	2.839	2.62046	2.7093	1.45671	1.4115	1.25266	5.1044e-11	5.5425e-10	-1.15386	down
FBgn0039727	Vps13B	868	510	606	311	287	248	3.36335	1.88205	2.47352	1.29204	1.19958	1.01193	1.78333e-09	1.5782e-08	-1.1536	down
FBgn0003862	trx	820	497	532	256	281	253	2.30073	1.33505	1.53957	0.784456	0.903024	0.759457	1.35755e-09	1.21613e-08	-1.15201	down
FBgn0000542	ec	534	348	397	205	164	177	2.44318	1.53865	1.90219	1.09506	0.892497	0.935789	9.17596e-10	8.41975e-09	-1.15192	down
FBgn0051832	CG31832	103	208	169	68	62	68	10.9845	20.9015	18.3458	7.19951	6.48054	7.12041	1.69038e-06	8.574e-06	-1.15182	down
FBgn0026577	CG8677	891	455	512	256	237	294	3.08139	1.494	1.90304	1.00091	0.929497	1.11967	1.28932e-07	8.32886e-07	-1.15075	down
FBgn0003638	su(w[a])	2162	1553	1801	852	807	729	17.4255	12.0461	15.4277	8.44029	8.09771	6.95262	1.27879e-15	2.45366e-14	-1.15068	down
FBgn0261787	brun	1363	872	1015	465	462	475	11.4534	7.04737	8.91939	4.35921	4.37484	4.38705	3.44847e-12	4.45536e-11	-1.14911	down
FBgn0029746	CG15465	869	486	619	258	297	291	2.34667	1.25822	1.7923	0.802517	0.91535	0.911807	3.30027e-09	2.81383e-08	-1.14621	down
FBgn0042627	FASN2	759	495	551	252	271	255	3.20897	2.01803	2.50282	1.26579	1.36618	1.26634	6.09604e-11	6.59962e-10	-1.14553	down
FBgn0263355	CG31688	1194	1098	1092	462	517	498	10.1365	9.0623	9.79789	4.60366	5.26484	4.82124	1.32131e-22	4.2205e-21	-1.14467	down
FBgn0261554	CG42672	1331	911	982	510	493	390	9.97192	6.48901	7.70301	4.35673	4.297	3.25863	1.08218e-11	1.30576e-10	-1.14465	down
FBgn0035192	CG9194	374	298	301	154	130	135	4.6188	3.52667	4.20451	2.24669	1.92971	1.91627	4.32374e-11	4.77049e-10	-1.14405	down
FBgn0041188	Atx2	778	504	583	249	277	280	4.47108	2.81719	3.37629	1.64201	1.76693	1.7793	6.3256e-11	6.83464e-10	-1.14195	down
FBgn0267758	asRNA:CR46089	71	66	60	27	21	32	0.83638	0.738934	0.716098	0.327467	0.249799	0.38022	7.61904e-05	0.000276039	-1.14157	down
FBgn0019990	Gcn2	581	406	524	204	216	234	3.95276	2.63316	3.78048	1.56066	1.66772	1.76933	1.04263e-11	1.26082e-10	-1.14079	down
FBgn0038146	CG9799	908	728	781	334	375	345	12.1229	9.29693	11.0887	5.09639	5.84364	5.15209	2.26443e-16	4.71656e-15	-1.14067	down
FBgn0015513	mbc	1177	773	789	403	379	406	6.37397	3.97134	4.52908	2.43741	2.29615	2.36545	3.57872e-11	4.00087e-10	-1.13873	down
FBgn0261574	kug	733	430	491	245	262	205	2.50437	1.3866	1.7508	0.857831	0.907475	0.702278	9.80113e-09	7.70862e-08	-1.13734	down
FBgn0265194	Trpm	825	589	678	260	307	342	4.39508	3.11233	3.89436	1.56161	1.91694	2.0682	5.51823e-12	6.97321e-11	-1.13718	down
FBgn0039863	CG1815	922	609	707	329	335	309	5.60934	3.55926	4.49022	2.2447	2.31876	2.07178	9.10539e-12	1.10966e-10	-1.13682	down
FBgn0040069	vanin-like	4883	4931	4661	2149	2066	2164	131.303	127.522	131.951	61.0995	63.9009	63.2379	2.14249e-36	1.38894e-34	-1.13646	down
FBgn0039257	tnc	453	272	318	139	121	186	1.10896	0.635376	0.860673	0.408017	0.363375	0.530668	1.65601e-07	1.04874e-06	-1.1349	down
FBgn0002562	Lsp1alpha	204113	191538	193058	86904	85366	87797	2842.03	2510.54	2952.78	1410.73	1403.48	1364.53	6.29905e-38	4.23389e-36	-1.13451	down
FBgn0004598	Fur2	1660	1170	1239	598	598	588	11.3077	7.60862	8.77167	4.59105	4.70425	4.44595	5.60106e-14	8.95843e-13	-1.13127	down
FBgn0261934	dikar	946	481	592	303	256	311	2.70553	1.24852	1.85593	1.08742	0.8357	0.936133	9.24462e-08	6.09044e-07	-1.13042	down
FBgn0028538	Sec71	1945	1272	1416	646	701	682	12.9426	8.15104	9.94619	4.91057	5.42418	5.09753	1.65966e-12	2.22562e-11	-1.13022	down
FBgn0026083	tyf	2123	1509	1489	760	722	764	7.41981	4.88661	5.54801	2.90458	2.79509	2.85651	1.4027e-13	2.14937e-12	-1.13019	down
FBgn0001311	kkv	2169	1550	1679	769	828	776	12.8436	8.80126	10.804	5.44337	6.00774	5.31171	5.3877e-15	9.64504e-14	-1.12953	down
FBgn0037137	Nopp140	2348	1951	2217	898	1022	956	20.1971	16.2626	20.4336	9.45969	11.1406	9.78295	2.50297e-21	7.51303e-20	-1.12933	down
FBgn0250851	CG33981	1386	870	1021	497	463	474	8.00481	4.94038	6.47313	3.22765	2.81136	2.93647	2.12092e-11	2.44855e-10	-1.12791	down
FBgn0015558	tty	283	233	210	113	113	88	1.86923	1.50151	1.37954	0.893942	0.833114	0.580707	6.87346e-09	5.55351e-08	-1.12767	down
FBgn0034300	CG5098	337	250	229	142	105	105	2.37741	1.68059	1.67268	1.07044	0.811757	0.811184	4.15496e-08	2.92369e-07	-1.12688	down
FBgn0004655	wapl	836	683	600	280	313	336	3.57452	3.00727	2.78372	1.52307	1.65429	1.85541	8.55845e-13	1.20059e-11	-1.12687	down
FBgn0016975	stnB	220	164	192	89	68	91	1.48454	2.20702	1.64603	1.17724	1.02041	1.10807	5.88995e-08	4.04072e-07	-1.12659	down
FBgn0025881	snoRNA:Me18S-A1576	701	983	861	351	373	392	215.756	273.364	259.499	100.418	116.539	116.534	7.21978e-17	1.59155e-15	-1.12622	down
FBgn0004391	shtd	812	453	464	257	242	250	4.75203	2.55844	2.83887	1.73262	1.6721	1.67093	6.17323e-08	4.21395e-07	-1.12496	down
FBgn0032040	CG13386	34	55	25	18	13	12	1.42923	2.45473	1.00554	0.871422	0.583551	0.750044	0.00238255	0.0060452	-1.1243	down
FBgn0003396	shn	831	426	541	298	241	239	3.04972	1.53836	2.07968	1.26019	1.01744	0.973771	1.27975e-07	8.27684e-07	-1.12357	down
FBgn0037420	CG15597	9169	10052	10614	4261	4624	4388	840.757	894.802	1000.44	434.654	481.333	424.407	3.3722e-36	2.17328e-34	-1.12134	down
FBgn0036124	CG7839	668	420	521	224	245	236	6.12714	3.64679	5.15614	2.31135	2.54089	2.33723	4.09685e-10	4.00045e-09	-1.12061	down
FBgn0027503	CG11970	449	337	310	179	123	175	2.89003	2.0862	2.10611	1.27075	0.878679	1.21841	1.35678e-08	1.04535e-07	-1.11919	down
FBgn0025802	Sbf	673	348	528	230	247	196	4.28822	2.12311	3.52271	1.61585	1.75071	1.34983	9.62174e-08	6.33128e-07	-1.11846	down
FBgn0024807	DIP1	1871	1568	1591	780	675	780	19.6552	15.4962	17.3447	9.13307	8.39691	9.02864	1.17021e-18	2.96093e-17	-1.11768	down
FBgn0033766	Nup188	591	366	397	213	207	172	5.19355	3.07466	3.75265	2.04289	1.95988	1.59443	1.34079e-08	1.03375e-07	-1.11599	down
FBgn0038651	Epg5	1534	1022	1194	541	549	570	9.44562	6.02442	7.62364	3.62046	3.72025	3.77959	9.50299e-13	1.32293e-11	-1.11588	down
FBgn0033308	CG8736	87	73	89	37	44	23	5.38857	4.41008	5.74741	2.65726	3.35464	1.6611	5.81257e-05	0.000215946	-1.1156	down
FBgn0263456	nwk	485	421	403	202	191	186	3.40157	2.85666	3.06816	1.67132	1.60267	1.52186	1.59743e-13	2.41399e-12	-1.11501	down
FBgn0024366	CG11409	59	41	76	29	8	31	0.398353	0.263738	0.529634	0.237747	0.0712481	0.239796	0.00205081	0.00529797	-1.11489	down
FBgn0264946	asRNA:CR44115	306	177	219	114	94	96	29.715	16.7832	22.0995	12.0847	10.1556	9.84135	5.12366e-07	2.92369e-06	-1.11431	down
FBgn0025391	Scgdelta	397	384	413	164	200	164	6.50697	6.43371	7.09127	3.41789	4.1201	3.24695	1.06607e-13	1.66617e-12	-1.11384	down
FBgn0035420	hob	971	611	664	315	320	355	5.58323	3.34414	4.04138	1.98818	2.03151	2.18473	5.18053e-10	4.97876e-09	-1.11334	down
FBgn0024189	sns	295	131	183	96	95	68	1.22421	0.523785	0.796085	0.460488	0.460277	0.319335	2.63951e-05	0.000105503	-1.11224	down
FBgn0029791	AdamTS-B	1112	935	979	402	536	406	9.3715	7.67363	8.61366	4.08499	5.58882	4.07727	2.5269e-14	4.20102e-13	-1.11191	down
FBgn0000592	Est-6	487	533	511	254	228	197	13.2901	13.8202	14.7504	6.86853	6.44773	5.67662	2.63622e-15	4.91197e-14	-1.11152	down
FBgn0050361	mtt	40	30	50	15	8	23	0.253724	0.208003	0.4004	0.161476	0.102918	0.256907	0.00265845	0.00666346	-1.11087	down
FBgn0035104	CG13875	62	105	80	34	41	28	1.46082	2.24011	1.76858	0.794722	0.977324	0.67944	6.39904e-05	0.000236053	-1.11041	down
FBgn0286511	Pld	1162	690	845	432	415	344	9.52516	5.32528	7.29259	3.92617	3.85653	3.05625	1.71751e-09	1.52242e-08	-1.10868	down
FBgn0015570	alpha-Est2	2948	3457	3133	1380	1461	1441	66.7421	74.864	76.2046	34.9652	37.2745	35.0887	6.60375e-32	3.58172e-30	-1.10683	down
FBgn0264876	asRNA:CR44067	67	45	44	17	29	17	8.02489	5.34746	5.56002	2.25226	3.98065	2.2535	0.000868348	0.00245513	-1.10573	down
FBgn0261800	LanB1	5919	3957	4478	2037	2094	2286	35.6081	22.8822	28.3881	13.5949	14.2401	15.0779	1.49916e-13	2.27491e-12	-1.10505	down
FBgn0015269	Nf1	490	293	318	158	176	150	2.32743	1.33399	1.61857	0.825731	0.917751	0.764563	7.34158e-08	4.93765e-07	-1.10445	down
FBgn0023441	fus	1854	1392	1549	645	738	765	18.126	13.8169	15.5829	6.83016	9.02254	8.72973	3.48456e-15	6.40551e-14	-1.10347	down
FBgn0005198	gig	885	600	692	328	339	303	5.75914	3.75857	4.7464	2.44183	2.57582	2.21292	1.62777e-11	1.91762e-10	-1.10326	down
FBgn0030595	CG14406	41	52	39	6	24	21	8.25829	7.91969	5.9121	1.53949	5.83374	3.65884	0.00268874	0.0067286	-1.10305	down
FBgn0026196	nop5	3662	3989	3740	1781	1639	1718	65.6926	68.6078	72.5682	37.4987	35.4588	34.7468	5.70358e-34	3.41467e-32	-1.10179	down
FBgn0039223	CG5805	1593	1524	1597	730	707	688	36.535	33.3222	38.0035	18.2935	18.0724	17.1033	1.66736e-26	6.99908e-25	-1.10136	down
FBgn0050104	NT5E-2	119	116	138	45	59	58	2.91218	2.76899	3.54488	1.20601	1.62698	1.58034	9.4281e-07	5.05849e-06	-1.10105	down
FBgn0037715	CG9399	2764	3029	3030	1295	1338	1349	158.205	163.377	175.556	76.6177	81.3709	79.6845	1.69242e-34	1.03012e-32	-1.10088	down
FBgn0266986	lncRNA:CR45437	49	53	42	29	9	19	4.43439	4.62417	3.99553	2.78649	0.948176	1.67203	0.00167228	0.00442655	-1.10027	down
FBgn0259685	crb	1158	662	789	443	353	362	5.44464	2.92532	3.88525	2.28763	1.83864	1.81134	1.12708e-08	8.77006e-08	-1.09827	down
FBgn0265296	Dscam2	52	34	45	14	12	26	0.211943	0.123765	0.2018	0.0637032	0.106727	0.186105	0.00188379	0.00491167	-1.0974	down
FBgn0037073	Tsr1	1162	890	901	425	449	454	15.0037	10.9457	12.507	6.29699	6.73268	6.502	2.67711e-14	4.42389e-13	-1.09659	down
FBgn0000442	Pkg21D	282	268	241	90	144	116	3.57858	3.29429	3.30839	1.36917	2.22429	1.71067	9.57028e-09	7.54874e-08	-1.09623	down
FBgn0263120	Acsl	7258	6402	6456	2964	2974	3184	101.602	85.3152	94.4767	44.1855	44.7065	46.7776	8.6429e-26	3.52014e-24	-1.09449	down
FBgn0263289	scrib	3470	2084	2316	1234	1151	1144	13.7474	8.02447	9.47293	6.03844	5.61283	5.68142	1.76504e-10	1.78722e-09	-1.09389	down
FBgn0032456	MRP	4539	2845	3360	1519	1727	1585	34.1844	20.5499	26.9807	13.0786	15.0836	13.2852	8.40344e-12	1.02984e-10	-1.09384	down
FBgn0263706	CG43658	938	531	636	337	293	311	4.21041	2.3257	3.0292	1.75335	1.5884	1.59846	1.63268e-08	1.24048e-07	-1.08834	down
FBgn0003731	Egfr	1517	1083	1272	553	604	595	9.99281	6.47535	8.87755	4.07943	4.49987	4.41865	6.43742e-14	1.02363e-12	-1.08805	down
FBgn0000464	Lar	613	323	388	201	189	198	3.00747	1.47119	1.94309	1.13498	1.16755	1.04277	3.06465e-07	1.8248e-06	-1.08792	down
FBgn0037926	Elp1	1011	860	902	376	481	398	11.1556	9.02573	10.3726	4.60836	5.82256	4.71899	3.92537e-15	7.1439e-14	-1.08771	down
FBgn0051259	CG31259	224	195	215	101	100	82	6.06786	5.07448	6.03721	3.05183	3.1619	2.39293	5.03792e-09	4.1657e-08	-1.08642	down
FBgn0051380	CG31380	40	33	33	17	16	9	1.71845	1.35094	1.46357	0.759225	0.721848	0.431424	0.00261977	0.00658156	-1.08605	down
FBgn0053229	CG33229	15708	10519	11689	5764	5678	5781	173.298	120.184	140.64	80.6331	80.4731	79.0321	1.11937e-13	1.73955e-12	-1.084	down
FBgn0085377	CG34348	684	755	696	343	329	298	17.8739	18.8784	18.6875	9.49271	9.23288	8.19122	9.49996e-19	2.4205e-17	-1.08328	down
FBgn0002645	Map205	110	95	101	35	34	63	1.56904	1.27947	1.31708	0.588226	0.481701	0.998759	4.58261e-05	0.000174028	-1.08312	down
FBgn0027580	PCB	23508	16073	18648	9096	8706	8692	174.642	115.143	146.292	81.1714	80.3669	76.3271	1.05583e-14	1.82456e-13	-1.083	down
FBgn0034504	CG8929	1281	925	1105	559	493	449	18.9115	13.2093	16.7968	9.69101	9.16899	8.03619	1.00368e-12	1.38842e-11	-1.08233	down
FBgn0000317	ck	833	575	560	273	299	316	4.84282	3.18531	3.43492	1.75226	1.92489	2.00161	5.58171e-10	5.31767e-09	-1.08188	down
FBgn0010355	Taf1	1430	972	1059	499	506	564	6.41115	4.15699	5.1058	2.62831	2.70416	2.88173	1.13375e-11	1.36199e-10	-1.08136	down
FBgn0029688	lva	3398	2365	2552	1373	1197	1210	10.0173	6.76909	8.13194	4.78992	4.25861	4.15511	4.36178e-13	6.27135e-12	-1.0809	down
FBgn0263352	Unr	748	394	469	268	235	217	4.6635	2.38323	3.19131	2.18553	1.88596	1.50192	3.47861e-07	2.04901e-06	-1.07971	down
FBgn0260753	Pdfr	232	189	225	90	101	99	3.32442	2.65652	3.31865	1.42255	1.66633	1.58612	6.18241e-09	5.04092e-08	-1.07931	down
FBgn0004198	ct	343	189	243	111	129	105	1.16605	0.604839	0.84646	0.416499	0.484506	0.385509	1.29525e-06	6.72867e-06	-1.07733	down
FBgn0030884	CG6847	673	500	516	248	271	248	6.11222	4.53367	5.21823	2.83266	3.09029	2.71122	1.65191e-11	1.94188e-10	-1.07715	down
FBgn0001114	Glt	10589	7362	8007	3815	4044	3999	99.8828	66.6824	80.9854	42.446	45.9687	43.177	2.53911e-14	4.21493e-13	-1.07715	down
FBgn0010113	hdc	761	427	469	270	238	236	2.85916	2.55714	1.89692	1.39079	1.55331	1.56321	1.28544e-07	8.30875e-07	-1.07711	down
FBgn0262730	dtn	247	130	166	81	93	65	1.30526	0.5968	0.831699	0.414532	0.499623	0.334293	1.54987e-05	6.49843e-05	-1.07596	down
FBgn0264272	mwh	332	224	333	137	143	121	3.2686	2.17251	3.43893	1.5631	1.69538	1.38871	3.35681e-08	2.40531e-07	-1.07052	down
FBgn0039591	CG9988	114	76	112	49	49	34	2.41008	1.53879	2.49623	1.14003	1.14433	0.781944	4.83249e-05	0.000182379	-1.0695	down
FBgn0028646	aralar1	3542	3163	3077	1525	1523	1464	47.953	41.1677	44.621	24.3055	24.6448	22.6782	1.86777e-23	6.37486e-22	-1.06939	down
FBgn0038156	side-IV	46	78	39	20	13	33	0.423249	0.668688	0.362086	0.205948	0.142237	0.3354	0.00223464	0.00572426	-1.06924	down
FBgn0260789	mxc	347	225	288	145	130	113	1.76337	1.09797	1.54674	0.850288	0.772645	0.644092	7.68935e-08	5.15573e-07	-1.06911	down
FBgn0042137	CG18814	192	302	247	105	120	108	14.2263	21.3514	18.8091	7.86521	9.06058	7.84378	1.7334e-08	1.31335e-07	-1.06842	down
FBgn0031897	CG13784	1561	1242	1281	653	583	644	16.8278	12.4387	14.8036	7.77348	8.00483	8.90698	1.45339e-15	2.76929e-14	-1.06624	down
FBgn0263392	Tet	1029	587	686	330	369	349	3.03779	1.68116	2.17356	1.13815	1.2932	1.17903	2.11755e-08	1.57608e-07	-1.06475	down
FBgn0022153	l(2)k05819	1258	792	886	480	451	412	11.0944	6.74358	8.18108	4.75116	4.53551	3.99964	8.95819e-10	8.24756e-09	-1.06397	down
FBgn0003175	px	1057	697	736	403	373	364	6.06487	3.94369	4.40278	2.74727	2.51312	2.42862	4.43387e-10	4.31034e-09	-1.06351	down
FBgn0265901	asRNA:CR44690	36	30	29	10	12	16	0.374175	0.29481	0.312435	0.116254	0.136539	0.173878	0.00390576	0.00935334	-1.06327	down
FBgn0030354	Upf1	1587	1118	1148	585	604	583	10.3117	6.95898	7.90583	4.4264	4.6337	4.32424	4.02388e-12	5.15622e-11	-1.06321	down
FBgn0261509	haf	725	540	567	284	286	272	4.33056	3.0952	3.62558	1.96748	2.09443	1.92558	8.17268e-12	1.00381e-10	-1.06185	down
FBgn0034498	CG16868	374	215	273	132	124	134	2.93092	1.61332	2.20995	1.15275	1.09635	1.15287	4.23944e-07	2.45753e-06	-1.06162	down
FBgn0030257	SmydA-4	263	408	358	169	146	152	4.59442	6.81222	6.44596	3.40589	3.03833	3.03355	1.28165e-09	1.15191e-08	-1.0611	down
Trans_newGene_273	-	44	63	38	9	26	24	3.50927	4.12211	3.11381	0.827217	2.13739	1.775	0.00266893	0.00668515	-1.06101	down
FBgn0013813	Dhc98D	334	145	208	121	104	79	0.815144	0.321558	0.525169	0.31941	0.301179	0.199445	5.72926e-05	0.00021314	-1.0606	down
FBgn0051632	sens-2	132	116	128	76	48	43	1.64877	3.15849	1.64856	1.04867	0.963947	0.912593	1.33108e-05	5.66563e-05	-1.05971	down
FBgn0023172	RhoGEF2	1625	1103	1283	549	630	669	7.37288	4.78211	6.01655	2.80629	3.22804	3.27367	1.78586e-11	2.08369e-10	-1.05911	down
FBgn0041096	rols	614	525	578	281	248	264	3.88016	3.22319	3.83579	2.10326	1.8819	1.95433	2.76565e-14	4.56333e-13	-1.05794	down
FBgn0023130	a6	187	196	174	68	106	78	2.89882	2.94083	2.78123	1.23156	2.01225	1.40825	2.09354e-07	1.29226e-06	-1.05752	down
FBgn0001991	Ca-alpha1D	576	354	400	162	208	236	2.8631	1.67533	2.0927	0.897199	1.17757	1.28591	2.02268e-07	1.25342e-06	-1.05581	down
FBgn0042085	Bap170	694	463	619	261	258	298	4.58673	2.9323	4.23475	1.96164	1.98734	2.2235	5.41091e-10	5.16393e-09	-1.05523	down
FBgn0020637	Lcp65Ag2	353	421	402	179	182	182	43.3507	49.7061	52.8909	23.923	25.1138	23.0267	1.4373e-13	2.19625e-12	-1.05298	down
FBgn0039120	Nup98-96	2377	1722	1774	876	898	952	14.8515	10.3162	11.6146	6.20033	6.37172	6.5926	3.35199e-13	4.87061e-12	-1.05289	down
FBgn0040290	RecQ4	293	243	245	101	121	136	2.11419	1.6777	1.85851	0.807402	0.981629	1.06999	9.11367e-09	7.21976e-08	-1.05228	down
FBgn0262945	lncRNA:CR43264	699	975	865	355	407	411	486.574	656.489	590.276	235.397	292.737	253.94	1.20174e-14	2.06368e-13	-1.05209	down
FBgn0030720	CG8939	1023	961	896	429	468	444	11.303	10.1079	10.7188	5.57202	6.2272	5.55866	2.49421e-18	6.21058e-17	-1.0517	down
FBgn0035734	CG14823	165	229	261	95	111	91	6.01523	8.04237	9.37697	4.30491	4.57965	3.52142	1.41432e-07	9.05954e-07	-1.05163	down
FBgn0283476	Dhc16F	157	60	118	48	46	52	0.415351	0.153708	0.339092	0.152074	0.145644	0.157382	0.000412886	0.0012597	-1.05087	down
FBgn0033728	Cpr49Ae	33	55	45	11	23	21	1.31127	2.12628	1.99371	0.545763	0.969237	0.956494	0.00231356	0.00589613	-1.0502	down
FBgn0031990	PAPLA1	3555	2087	2378	1248	1242	1220	21.3069	11.9339	15.0751	8.56697	8.50337	8.19487	1.24016e-09	1.11553e-08	-1.05015	down
FBgn0035145	MED14	922	605	675	337	324	357	6.23647	3.90916	4.76911	2.59738	2.54338	2.71781	6.02432e-10	5.70955e-09	-1.05001	down
FBgn0003308	ry	398	276	359	186	144	144	3.3272	2.22258	3.21066	1.82288	1.40706	1.37538	2.1989e-08	1.62999e-07	-1.05	down
FBgn0038597	CG8064	495	363	376	201	191	178	6.25196	4.40947	5.07642	2.92826	2.8422	2.5368	8.97364e-10	8.25484e-09	-1.04869	down
FBgn0266284	Ns3	887	809	901	438	388	385	13.7824	12.1657	14.8186	8.04936	7.31187	6.96753	2.8559e-17	6.58721e-16	-1.04798	down
FBgn0038261	CG14856	56	56	56	24	22	27	1.43713	1.39238	1.50839	0.697283	0.648764	0.765391	0.00037498	0.00115661	-1.0471	down
FBgn0039596	CG10000	77	114	74	38	34	45	1.30064	1.84668	1.31822	0.723496	0.657835	0.857552	8.3185e-05	0.00029842	-1.04655	down
FBgn0039696	Rnb	252	232	246	125	118	93	3.04219	2.6821	3.11276	1.70567	1.63779	1.24686	4.598e-09	3.83377e-08	-1.04651	down
FBgn0000024	Ace	1051	1117	994	498	533	446	20.2817	22.4737	21.5666	10.0936	10.5259	8.18941	9.4004e-19	2.40072e-17	-1.04595	down
FBgn0032120	CG33298	932	589	598	388	314	274	6.90454	4.21639	4.65238	3.12396	2.50356	2.19028	8.20786e-08	5.46991e-07	-1.04494	down
FBgn0034964	IntS1	582	402	472	217	235	224	3.39523	2.24416	2.91748	1.44282	1.59385	1.46514	5.666e-10	5.38393e-09	-1.04323	down
FBgn0036043	CG8177	1933	1381	1527	729	812	721	16.0017	10.8231	13.5353	6.65563	7.39847	6.46852	8.65882e-13	1.21312e-11	-1.04293	down
FBgn0029088	disp	339	295	345	151	155	149	3.24253	2.68712	3.46207	1.59595	1.66225	1.54602	3.61394e-11	4.03612e-10	-1.04203	down
FBgn0002522	lab	81	48	79	27	32	32	0.928856	0.595651	1.17933	0.363181	0.508058	0.516679	0.000425851	0.00129601	-1.04181	down
FBgn0024251	bbx	2438	1982	2018	1040	983	1000	18.2416	14.4561	16.0377	10.3494	9.54139	9.78653	3.13668e-17	7.2045e-16	-1.04104	down
FBgn0038380	CG14877	354	243	308	119	176	121	2.5625	1.60636	2.40994	0.942501	1.78145	1.17503	3.04141e-07	1.81491e-06	-1.04088	down
FBgn0033538	CG11883	277	272	273	122	129	131	3.41371	3.07871	3.4847	1.70556	1.86679	1.77463	6.9696e-11	7.46421e-10	-1.04028	down
FBgn0039590	CG10011	299	224	213	105	103	131	1.09723	0.785196	0.840966	0.448445	0.445399	0.545854	1.8542e-07	1.16018e-06	-1.03965	down
FBgn0030097	CG12115	865	1053	974	444	454	458	52.6239	62.5257	63.5933	30.2631	32.0813	29.9063	5.9395e-20	1.63912e-18	-1.03952	down
FBgn0026388	Or46a	3021	2024	2270	1179	1090	1155	27.0126	18.7631	21.0694	16.0939	12.3834	14.0629	7.186e-12	8.91617e-11	-1.03941	down
FBgn0028699	Rh50	582	446	562	232	246	264	15.1612	11.0685	14.945	6.42397	7.19812	7.31707	1.59456e-11	1.88052e-10	-1.03929	down
FBgn0038938	CG7084	689	544	522	251	269	299	12.1982	9.55834	10.031	5.12574	5.62956	5.95833	4.12116e-11	4.56075e-10	-1.03922	down
FBgn0026428	HDAC6	5094	3680	4411	2012	2134	2053	44.5539	31.1212	40.6269	21.4699	23.4872	21.4401	5.33661e-15	9.5849e-14	-1.03784	down
FBgn0035581	Dnah3	337	174	196	127	89	105	0.972072	0.568135	0.581461	0.484964	0.468748	0.333163	2.52817e-05	0.000101609	-1.03718	down
FBgn0030505	NFAT	825	511	524	292	298	274	5.00739	2.97943	3.25181	1.95809	2.0292	1.82841	3.47163e-08	2.47947e-07	-1.03695	down
FBgn0031116	CG1695	71	53	67	24	34	26	0.406609	0.297716	0.406071	0.165911	0.234325	0.179388	0.000380791	0.00117222	-1.03686	down
FBgn0038130	CG8630	1486	1355	1344	695	625	652	28.0818	24.4883	27.2962	15.259	13.9625	13.9353	1.12551e-19	3.07509e-18	-1.0365	down
FBgn0035357	MEP-1	1975	1399	1549	745	753	813	11.923	7.95377	9.93343	5.17747	5.39043	5.54227	1.1968e-12	1.64107e-11	-1.03645	down
FBgn0029906	xit	317	278	279	146	143	118	11.7436	9.85956	10.149	6.21339	6.2616	4.59781	9.13811e-10	8.39205e-09	-1.03529	down
FBgn0261503	lncRNA:CR42651	45	41	40	19	17	18	1.4894	1.31549	1.35525	0.642725	0.590204	0.628238	0.00161401	0.0042904	-1.03228	down
FBgn0052277	CG32277	54	41	49	15	26	21	3.47667	2.55618	3.29296	1.12302	1.8758	1.45045	0.00146203	0.00392367	-1.03191	down
FBgn0037385	glob3	1075	1030	917	446	506	474	27.8988	26.0657	25.223	12.3742	14.0645	12.6666	6.09512e-17	1.36282e-15	-1.0319	down
FBgn0262870	axo	1321	854	985	542	500	439	6.69576	4.16738	5.16328	3.13557	2.9173	2.48911	1.09205e-09	9.8799e-09	-1.03122	down
FBgn0025571	SF1	1939	1706	1837	879	910	805	19.5271	16.6016	19.1319	10.4929	11.0575	9.58154	8.27811e-20	2.26737e-18	-1.03117	down
FBgn0034657	LBR	343	323	328	177	144	145	5.8863	5.26089	5.772	3.4348	2.88823	2.76518	8.45891e-11	8.93691e-10	-1.02876	down
FBgn0026616	alpha-Man-IIb	93	112	118	52	34	60	0.780924	0.89487	1.04226	0.470313	0.315401	0.540669	3.58485e-05	0.000139127	-1.02858	down
FBgn0031985	mon2	1552	1102	1175	612	564	632	11.341	7.69742	8.97621	4.97236	4.6582	5.07261	1.09181e-11	1.31594e-10	-1.02642	down
FBgn0000119	arr	1103	686	794	403	419	392	7.62982	4.61467	5.79049	3.12426	3.31009	2.97869	3.09659e-09	2.64635e-08	-1.02639	down
FBgn0028496	CG30116	217	160	163	82	74	94	1.09186	0.773539	0.872895	0.486158	0.444648	0.543947	1.17682e-06	6.17492e-06	-1.02613	down
FBgn0263599	l(3)72Ab	1602	1170	1118	574	616	649	8.91868	6.22306	6.7219	3.67412	3.98254	4.02555	3.70345e-11	4.12767e-10	-1.02377	down
FBgn0014075	Uggt	2007	1367	1543	711	748	866	16.7641	10.9365	13.6058	6.4887	6.85195	7.74358	6.24767e-11	6.75711e-10	-1.02315	down
FBgn0004878	cas	221	181	158	91	74	95	2.22917	1.78148	1.6887	1.12794	0.916691	1.13759	9.06397e-07	4.88945e-06	-1.02279	down
FBgn0050055	lncRNA:CR30055	458	575	549	232	257	258	14.1937	18.012	17.8185	8.03364	10.2947	10.7011	6.2977e-14	1.00287e-12	-1.02265	down
FBgn0250786	Chd1	1639	1222	1429	638	654	743	7.08209	5.04545	6.58965	3.28702	3.42953	3.71168	3.13771e-13	4.57137e-12	-1.02227	down
FBgn0026375	RhoGAPp190	869	506	550	322	327	252	4.56232	2.53442	3.13986	1.88415	1.9093	1.4958	3.47447e-07	2.04768e-06	-1.02132	down
FBgn0031865	Nha1	632	461	587	251	266	277	10.4692	7.39815	10.7134	4.98754	5.51123	5.22311	8.13988e-11	8.60816e-10	-1.0212	down
FBgn0051151	wge	1187	755	805	404	446	446	6.21581	3.80612	4.40124	2.42996	2.73941	2.65154	4.613e-09	3.84335e-08	-1.02091	down
FBgn0053988	Mid1	65	40	50	15	21	31	0.351109	0.150665	0.203746	0.0997789	0.137052	0.15711	0.00223634	0.00572647	-1.01936	down
FBgn0038074	Gnmt	3842	4442	4315	1973	1997	2048	167.49	184.389	204.878	100.587	104.176	99.5789	3.98317e-30	1.9482e-28	-1.01907	down
FBgn0039688	Kul	438	275	308	158	150	171	1.97967	1.18447	1.47248	0.806718	0.776274	0.855837	2.1645e-07	1.33002e-06	-1.01802	down
FBgn0053138	AGBE	3731	3489	3649	1705	1756	1743	59.2514	53.0792	62.4996	32.4652	34.2915	32.1691	6.41471e-27	2.75606e-25	-1.01782	down
FBgn0027287	Gmap	2377	2279	2459	1187	1115	1103	13.6565	12.6695	15.1976	8.04567	7.61585	7.23332	1.21509e-24	4.54353e-23	-1.01681	down
FBgn0032069	LManVI	4516	3488	3522	1842	1863	1800	46.9147	34.2991	40.8121	23.0846	23.9819	21.5795	3.32049e-15	6.11417e-14	-1.01644	down
FBgn0285917	sbb	1038	622	784	385	401	370	3.38324	1.96438	2.70579	1.5227	1.55746	1.42396	9.48675e-09	7.49364e-08	-1.016	down
FBgn0004057	Zw	1112	1059	1105	495	501	569	16.3725	15.1407	17.8259	9.03534	9.40506	10.0791	1.19916e-18	3.02022e-17	-1.01584	down
FBgn0261285	Ppcs	438	341	387	190	185	178	6.29774	4.69817	5.78566	2.83765	2.7851	2.67216	2.06021e-10	2.07269e-09	-1.01469	down
FBgn0262656	Myc	509	275	343	176	165	187	4.23779	2.12359	3.12221	1.49412	1.46037	1.51203	1.56364e-06	7.98658e-06	-1.01451	down
FBgn0034974	CG16786	56	82	80	29	38	31	0.656617	0.90851	1.0007	0.389458	0.526609	0.395144	0.000240218	0.000778011	-1.01433	down
FBgn0033392	CG8027	232	168	214	90	104	94	4.04298	2.82949	3.91642	1.77015	2.08292	1.74931	3.02761e-07	1.80864e-06	-1.01413	down
FBgn0266623	asRNA:CR45130	204	112	147	69	58	86	9.29657	4.88667	7.01804	3.37803	2.93898	4.17003	5.56791e-05	0.000207561	-1.0137	down
FBgn0030809	Ubr1	1611	991	1131	620	593	559	9.08073	5.36291	6.68547	3.93557	3.8767	3.51128	3.62055e-09	3.06781e-08	-1.01346	down
FBgn0051407	CG31407	2570	1449	1820	886	981	908	14.0376	10.5669	14.253	21.0795	25.8924	23.4112	1.36942e-08	1.05435e-07	-1.01047	down
FBgn0038816	Lrrk	331	221	243	96	146	131	2.01638	1.29761	1.55543	0.644397	0.999085	0.864224	1.76307e-06	8.91793e-06	-1.00982	down
FBgn0037144	CG7458	754	810	741	335	386	383	15.2884	16.14	16.6372	7.88621	9.30427	9.06531	6.72052e-17	1.49049e-15	-1.00944	down
FBgn0029935	CG4615	543	562	467	264	228	258	13.1242	13.1739	12.0159	7.17742	6.38637	7.02438	1.15236e-12	1.58211e-11	-1.00939	down
FBgn0020307	dve	312	224	293	143	125	124	2.15662	1.6957	2.21258	1.38992	1.0997	1.16847	5.24225e-08	3.63047e-07	-1.00871	down
FBgn0284435	tyn	424	293	268	164	130	170	5.89793	3.76517	3.99568	2.28942	1.81963	2.36741	6.94385e-07	3.83452e-06	-1.00846	down
FBgn0263316	Mrp4	812	609	603	313	317	337	8.09494	5.82356	6.31255	3.41823	3.45578	3.59704	1.07565e-10	1.1181e-09	-1.00745	down
FBgn0038181	CG9297	7125	5321	5505	2874	2816	2938	48.8308	34.6518	41.5938	23.5643	23.4121	23.0306	2.30863e-14	3.84398e-13	-1.00712	down
FBgn0040237	bor	2417	2564	2252	1147	1154	1184	32.0636	33.0428	31.5305	18.1041	18.6955	18.3351	2.14784e-24	7.87219e-23	-1.00661	down
FBgn0024179	wit	605	515	563	270	269	268	5.65577	4.61672	5.52099	2.85578	2.81096	2.72461	1.80867e-13	2.70708e-12	-1.00592	down
FBgn0052344	CG32344	833	692	682	382	340	336	11.7919	9.45871	9.9732	5.91269	5.36506	5.12675	9.39518e-13	1.30959e-11	-1.0059	down
FBgn0011739	wts	697	421	459	202	282	262	3.84248	2.23644	2.63977	1.26207	1.79345	1.63784	5.74046e-07	3.23687e-06	-1.00588	down
FBgn0054045	CG34045	33	42	62	17	26	16	4.70972	5.8911	8.95274	2.46375	3.83917	2.29125	0.00324128	0.00792313	-1.0054	down
FBgn0010100	mAcon1	10596	7032	8280	4142	4304	4002	128.365	82.9844	107.666	60.8111	65.1091	58.0382	6.09123e-12	7.64439e-11	-1.00465	down
FBgn0029992	Upf2	748	525	626	312	288	309	5.27339	3.54786	4.62065	2.47197	2.32621	2.41332	2.68735e-10	2.65488e-09	-1.00367	down
FBgn0026593	CG5707	1435	1782	1644	739	801	800	35.2129	41.85	42.6798	21.1402	23.6729	22.2851	1.39288e-20	3.97407e-19	-1.00317	down
FBgn0001965	Sos	797	533	700	327	288	355	4.36812	2.80839	4.02922	2.1097	1.90455	2.25855	2.75865e-09	2.36863e-08	-1.00271	down
FBgn0033367	PPO2	3723	2468	3168	1468	1557	1476	55.0338	35.3459	49.8892	26.5409	29.1822	26.1285	1.13942e-11	1.3673e-10	-1.00214	down
FBgn0259228	C3G	1160	597	795	419	403	391	6.11889	3.18391	4.3987	2.57953	2.51623	2.38525	4.55689e-07	2.62764e-06	-1.00185	down
FBgn0034075	Asph	1696	1561	1457	760	726	791	16.463	14.4941	15.712	8.89425	8.44356	8.91309	2.68822e-18	6.64478e-17	-1.00135	down
FBgn0033155	Br140	636	377	533	247	246	244	3.50105	2.01109	3.09888	1.64933	1.67437	1.59698	6.95197e-08	4.71031e-07	-1.00056	down
FBgn0035173	CG13907	1486	1109	1264	568	662	629	12.0543	8.611	10.7459	5.14644	6.07095	5.59615	1.26084e-12	1.72456e-11	-1.00052	down
FBgn0033287	CG8701	566	670	640	1197	1189	1300	25.0341	28.4795	29.5684	58.9384	60.1531	63.2253	2.29643e-20	6.48444e-19	1.00001	up
FBgn0053306	CG33306	2400	3451	3040	5823	5750	5889	184.634	258.243	251.132	496.553	496.483	483.998	7.50493e-18	1.80316e-16	1.00047	up
FBgn0002609	E(spl)m3-HLH	215	250	251	506	447	462	8.12672	9.11182	9.74061	21.1907	18.924	19.1358	1.87558e-13	2.79915e-12	1.00061	up
FBgn0030290	CG11756	22	53	34	84	83	62	1.54529	3.61014	2.48273	6.42526	6.50213	4.62472	0.00066062	0.00191222	1.00209	up
FBgn0030014	CG15337	41	35	22	75	59	73	1.41897	1.24466	0.799157	2.89852	2.35644	2.79433	0.000528222	0.0015692	1.00267	up
FBgn0035776	CG8564	257	268	235	547	467	493	6.37503	6.36151	6.06867	15.0874	13.1421	13.3116	3.19345e-13	4.64641e-12	1.00305	up
FBgn0030078	CG10970	1357	1889	1839	3297	3322	3393	115.85	158.484	161.197	314.383	326.008	323.249	1.38895e-17	3.27959e-16	1.00341	up
FBgn0030278	CG15200	109	132	100	264	194	227	19.8283	23.3194	18.2007	48.3486	36.074	40.34	9.8683e-08	6.48573e-07	1.00365	up
FBgn0051788	CG31788	190	164	144	326	342	328	120.031	98.2015	91.7469	185.778	207.337	165.296	4.61485e-10	4.47832e-09	1.00444	up
FBgn0039041	CG13838	20	17	23	48	37	45	5.13595	4.29726	5.79067	12.0427	9.48084	10.7606	0.00192716	0.00501519	1.00463	up
FBgn0036708	CG13725	41	26	51	98	78	72	2.98847	1.80778	3.83346	7.59455	6.06381	5.41993	0.000324187	0.001018	1.00512	up
FBgn0030357	Sclp	471	687	443	985	1124	1073	116.226	163.107	103.625	170.032	194.111	193.93	3.16909e-11	3.56841e-10	1.00553	up
FBgn0051174	CG31174	22	53	46	122	88	50	2.04529	4.71804	4.4805	11.0688	8.00945	4.40186	0.00181285	0.00475157	1.00557	up
FBgn0004172	Mst84Da	44	81	91	137	126	180	29.9567	52.0072	61.1455	84.6518	82.7095	103.971	4.4208e-05	0.000168619	1.00564	up
FBgn0031849	CG11327	166	273	171	414	388	418	3.39786	5.35491	3.66658	9.14675	8.56937	9.01603	1.45695e-08	1.11469e-07	1.00579	up
FBgn0035608	blanks	254	312	239	548	544	506	10.9341	12.5942	10.6567	23.8252	23.7633	21.2825	4.37083e-13	6.27612e-12	1.00584	up
FBgn0085329	CG34300	23	33	20	64	58	41	4.97658	6.83812	4.44465	13.3845	11.9046	8.43673	0.00127663	0.00346636	1.0065	up
FBgn0034274	CG10931	27	42	74	90	93	118	1.3046	1.9939	3.73095	4.72716	4.96902	6.06093	0.000494625	0.00148225	1.00725	up
FBgn0004173	Mst84Db	321	464	454	771	798	890	123.608	174.008	174.947	298.32	324.831	333.64	1.14097e-12	1.56844e-11	1.00771	up
FBgn0033574	Spn47C	230	278	242	493	511	485	9.41077	10.143	10.9086	21.8266	22.9263	19.9124	2.20549e-14	3.67783e-13	1.00816	up
FBgn0085321	CG34292	29	16	22	41	42	64	2.40001	1.27093	1.80584	3.24348	3.32085	4.99289	0.00231357	0.00589613	1.00816	up
FBgn0061196	CG15468	51	45	24	93	64	98	2.00863	1.69508	0.997149	3.97594	2.8067	4.0391	0.000538411	0.00159514	1.00845	up
FBgn0058064	ARY	17	12	18	31	33	41	1.03181	0.72116	1.08616	1.70574	1.77398	2.15291	0.00412266	0.00980206	1.0085	up
FBgn0002565	Lsp2	142945	123731	130924	263342	262716	262786	2004.68	1640.92	2021.26	4468.87	4571.58	4269.92	2.1484e-24	7.87219e-23	1.0112	up
FBgn0031128	hydra	199	192	180	353	383	406	5.40595	5.06129	5.14143	10.6122	11.3086	11.8637	4.80542e-12	6.10768e-11	1.0114	up
FBgn0028850	CG15260	44	31	39	91	93	57	3.18875	2.19905	2.90675	7.05136	7.37003	4.34714	0.000302052	0.000953685	1.01144	up
FBgn0036089	CG14151	38	49	57	107	87	103	5.63139	7.08252	8.71297	16.2093	13.0549	15.2747	2.93142e-05	0.000115861	1.01195	up
FBgn0034825	Gpdh2	30	63	42	96	108	78	1.31123	2.58323	1.8929	4.50256	5.15203	3.52918	0.000177498	0.000590187	1.01295	up
FBgn0031504	CG15403	40	41	41	87	69	98	3.32342	3.19134	3.54101	7.02779	5.69319	7.58566	7.33541e-05	0.000267088	1.01302	up
FBgn0038088	CG10126	290	352	318	565	623	729	16.6605	20.1274	19.6012	35.9988	38.6154	42.7222	2.63149e-13	3.86469e-12	1.0145	up
FBgn0013301	ProtB	166	219	196	444	364	357	18.6592	23.6668	21.7767	49.4368	40.7884	39.304	1.14899e-10	1.18758e-09	1.0152	up
FBgn0031372	CG7295	60	100	96	158	175	188	2.46825	3.91871	4.26847	6.68384	7.66046	7.27275	1.14579e-06	6.02987e-06	1.01529	up
FBgn0037646	CAHbeta	230	240	239	494	468	455	10.6705	10.7316	11.5486	24.858	23.9537	22.2791	1.05083e-14	1.81878e-13	1.01646	up
FBgn0028844	CG15283	19	16	25	30	53	50	1.8655	1.51066	2.45633	2.99052	5.27043	4.5746	0.0026721	0.00669142	1.0165	up
FBgn0029940	CG1958	81	81	61	146	151	159	3.71845	3.52368	2.91155	7.19688	7.47315	7.53096	6.68743e-07	3.70412e-06	1.01771	up
FBgn0037857	Tengl4	35	47	29	75	84	74	1.9168	2.3729	1.63162	3.90409	4.29179	3.77078	0.000129116	0.0004447	1.01777	up
FBgn0031426	CG18641	373	363	384	745	722	770	16.1996	14.7094	17.1816	34.3653	32.2843	33.9718	3.27559e-18	8.0285e-17	1.01885	up
FBgn0019940	Rh6	52	94	60	172	104	152	1.75299	3.01615	2.12347	6.71716	4.22491	5.82585	4.78383e-05	0.000180792	1.01938	up
FBgn0031784	CG9222	67	67	68	129	129	156	2.46101	2.3649	2.62364	5.25158	5.33609	6.15512	9.35274e-07	5.0279e-06	1.02011	up
FBgn0038357	CG5623	29	34	18	62	65	48	1.37539	1.54349	0.900997	3.28017	3.51343	2.49279	0.000840019	0.00238179	1.02017	up
FBgn0037191	CG14448	41	56	58	109	105	106	2.91958	3.95517	4.30849	8.55358	8.246	8.27578	8.84074e-06	3.91034e-05	1.02099	up
FBgn0046258	CG12880	100	130	156	261	273	248	2.10176	2.61215	3.40831	6.2583	6.67675	5.87932	1.02884e-08	8.0687e-08	1.02154	up
FBgn0085197	CG34168	433	585	532	991	1026	1080	93.8595	122.662	115.218	213.571	225.032	228.498	6.62639e-17	1.47259e-15	1.02186	up
FBgn0250846	glob2	83	92	105	185	192	192	6.40256	6.70243	7.85725	14.4061	14.7427	15.1083	2.12738e-08	1.58165e-07	1.02202	up
FBgn0010038	GstD2	278	445	258	607	738	641	18.1576	26.7338	17.4264	43.3594	58.0293	43.6025	8.78211e-09	6.97729e-08	1.0222	up
FBgn0051949	CG31949	60	94	58	136	135	166	8.51237	12.9025	8.56026	19.2554	19.2614	23.3101	5.59889e-06	2.57629e-05	1.02234	up
FBgn0037176	CG14456	114	149	154	291	261	291	6.52665	7.97517	9.38125	19.9435	18.6105	19.0826	6.91483e-10	6.47659e-09	1.02339	up
FBgn0051644	CG31644	44	51	30	89	79	95	10.0586	11.1277	7.01179	19.5808	17.887	20.2613	8.24291e-05	0.000296096	1.02374	up
FBgn0028942	CG16852	43	27	34	70	87	65	2.37833	1.4399	1.96059	4.0872	5.20528	3.65036	0.000240235	0.000778011	1.02375	up
FBgn0266417	ringer	1072	1452	1245	2375	2528	2626	57.0735	75.1196	72.037	140.986	154.12	150.286	2.00425e-19	5.35575e-18	1.02398	up
FBgn0038122	CG8138	48	62	40	105	97	110	3.4385	4.27212	3.08047	8.10186	7.74654	8.18322	1.765e-05	7.30813e-05	1.02422	up
FBgn0038915	CG17819	64	70	44	113	141	116	8.36793	8.9626	5.88686	14.7451	18.4131	14.853	1.15553e-05	4.99409e-05	1.02431	up
FBgn0036939	CG7365	208	179	139	358	388	326	4.5499	3.78356	3.24344	9.11344	10.1707	8.14387	4.91e-09	4.07222e-08	1.02444	up
FBgn0085256	CG34227	3488	5359	4644	8457	8445	10141	532.407	805.732	751.67	1406.95	1472.11	1597.43	3.85859e-14	6.25366e-13	1.025	up
FBgn0042175	CG18858	163	182	165	320	396	316	3.91506	4.16505	4.20067	8.57211	10.7402	8.26394	7.34247e-11	7.82762e-10	1.02551	up
FBgn0040365	CG14628	18	47	19	41	74	72	3.7097	9.22011	4.03388	8.41581	15.6885	14.15	0.00274897	0.00685271	1.02562	up
FBgn0028997	nmdyn-D7	99	160	118	235	274	258	3.31451	5.0586	4.11258	8.42314	10.0028	9.01596	2.96408e-08	2.15062e-07	1.02567	up
FBgn0035886	Jon66Ci	79377	100051	99922	183969	188908	184515	4122.36	5024.47	5682.39	11486.2	12428.6	11176.7	7.6177e-26	3.12583e-24	1.02588	up
FBgn0032049	Bace	248	272	251	554	502	495	10.3118	10.9355	10.7135	26.6888	24.5176	22.9268	4.93913e-15	8.88824e-14	1.02622	up
FBgn0033787	CG13321	5585	6362	6126	11898	12269	11916	223.213	242.509	259.292	561.637	597.917	548.148	1.14572e-35	7.21411e-34	1.02787	up
FBgn0038773	CG10887	41	74	25	110	88	103	0.950248	1.61119	0.583714	2.53436	2.00243	2.3061	0.000471823	0.00142366	1.02922	up
FBgn0262577	CG43117	2969	3682	3518	6399	6669	7294	2413.71	2875.41	2939.15	5107.59	5795.31	5436.34	2.99212e-24	1.07835e-22	1.0295	up
FBgn0032894	CG14402	57	71	61	141	140	110	1.83761	2.18408	2.05501	4.91243	4.90483	3.74586	2.21608e-06	1.09712e-05	1.02964	up
FBgn0051901	Mur29B	1051	1083	1124	2164	2278	2089	42.8447	42.2016	49.523	108.11	107.192	102.084	5.52859e-27	2.3847e-25	1.0297	up
FBgn0261522	lncRNA:CR42657	77	66	89	157	171	150	8.09526	6.521	9.00907	14.7579	15.9481	14.0546	3.35459e-07	1.98343e-06	1.02979	up
FBgn0052655	CG32655	48	94	112	162	208	160	2.35649	4.31984	5.76156	7.83085	10.0898	7.49304	2.35323e-05	9.51364e-05	1.03103	up
FBgn0033573	Obp47a	41	47	40	80	93	96	7.31571	7.9667	7.4371	14.71	17.2494	16.8574	2.32909e-05	9.43345e-05	1.03354	up
FBgn0052073	CG32073	1068	1593	1565	2730	2824	2968	180.437	253.45	262.024	439.162	462.026	462.917	5.36309e-15	9.6167e-14	1.03418	up
FBgn0038708	Scsalpha2	162	142	167	288	344	329	5.96039	5.05935	6.51254	11.9096	14.432	13.2114	9.74421e-11	1.02258e-09	1.03424	up
FBgn0262794	CG43175	116	153	194	365	284	300	32.186	40.9284	54.2341	101.221	81.104	79.9044	3.50955e-08	2.50167e-07	1.0346	up
FBgn0038281	RpL10Aa	68	81	64	150	140	150	6.76621	7.69502	6.62021	15.0467	14.255	14.5848	3.05227e-07	1.81941e-06	1.03518	up
FBgn0035667	Jon65Ai	22613	30378	30009	55678	57580	53666	1252.99	1613.2	1816.81	3669.38	3924.8	3384.55	3.43622e-21	1.01475e-19	1.03532	up
FBgn0262687	lncRNA:CR43157	77	99	99	206	174	185	56.1412	67.3673	69.1867	125.346	114.726	109.746	3.78937e-08	2.68367e-07	1.03596	up
FBgn0036996	mag	5684	5431	5601	10974	11724	10964	144.399	131.623	153.945	325.607	359.825	315.953	3.19952e-31	1.66132e-29	1.03618	up
FBgn0031562	CG3604	352	594	600	987	1084	1072	46.7616	77.103	84.7023	138.66	162.644	143.56	1.52516e-10	1.55006e-09	1.03677	up
FBgn0085239	CG34210	22	27	30	62	57	52	2.71873	3.3489	3.95678	8.54907	8.03185	6.58188	0.000374432	0.00115557	1.03741	up
FBgn0046793	CG32236	82	70	79	151	150	178	3.30003	2.68703	3.32251	6.24567	6.22383	7.29526	2.11914e-07	1.30508e-06	1.0388	up
FBgn0041160	comm2	197	197	190	376	395	418	5.41686	5.2414	5.39329	11.2979	12.0336	12.2837	1.67632e-13	2.52277e-12	1.03894	up
FBgn0032969	CG2528	78	73	56	141	130	161	2.11869	1.89445	1.56592	3.77558	3.42593	4.17744	1.46482e-06	7.51689e-06	1.03913	up
FBgn0037972	CG10005	80	67	79	139	164	167	3.16984	2.68548	4.56801	6.4664	7.49118	7.31499	2.69962e-07	1.63049e-06	1.04145	up
FBgn0085190	CG34161	34	34	23	52	77	69	5.35823	5.02386	3.66702	7.94628	12.1201	10.3401	0.000337318	0.0010559	1.04159	up
FBgn0264570	lncRNA:CR43942	13	20	11	26	38	38	0.990446	1.46857	0.837571	1.93837	2.82579	2.76814	0.00409779	0.00975775	1.04174	up
FBgn0035727	CG10063	171	206	217	395	379	438	9.17351	10.7607	12.3729	24.5745	24.2002	26.2516	1.47716e-12	1.98818e-11	1.04246	up
FBgn0031677	CG14036	40	44	30	61	82	103	12.1741	12.7998	9.38413	18.1032	25.2836	28.8462	0.000171063	0.000570697	1.04304	up
FBgn0000591	E(spl)m8-HLH	14	35	28	41	59	72	0.936836	2.19069	1.92799	3.02594	4.4767	5.07096	0.00146931	0.00393973	1.04555	up
FBgn0036328	CG10749	44	35	26	74	74	79	2.29953	1.77407	1.45789	4.02556	4.10397	4.18955	0.000126852	0.00043758	1.04614	up
FBgn0261686	CG42733	35	35	31	71	79	67	3.67144	3.59201	4.27038	8.35956	9.68629	7.77594	7.88142e-05	0.00028451	1.04696	up
FBgn0036805	Chmp1	983	1289	1205	2468	2192	2401	42.9551	54.983	58.8066	122.668	108.759	116.991	1.45743e-20	4.14744e-19	1.04765	up
FBgn0259977	Tdc1	157	208	171	424	360	319	2.49765	3.18315	2.84087	7.74258	6.73902	5.76171	2.18916e-10	2.19638e-09	1.04842	up
FBgn0260462	CG12163	2187	2264	2312	4474	4698	4558	42.9359	43.539	48.2844	102.206	107.891	100.743	1.48989e-34	9.11914e-33	1.04986	up
FBgn0031513	CG3347	23	13	12	39	42	31	0.564339	0.316078	0.305685	0.959208	1.0256	0.735266	0.00324341	0.00792656	1.05023	up
FBgn0039792	CG2267	284	262	272	540	541	597	5.76592	6.17128	6.2169	12.8698	12.8194	14.5931	1.05372e-15	2.03967e-14	1.05191	up
FBgn0036214	CG7264	86	71	88	167	189	157	2.06932	1.6654	2.18694	4.47007	5.13243	4.09394	1.0098e-07	6.62476e-07	1.05329	up
FBgn0033063	CG14589	84	92	87	186	200	162	4.61931	4.66088	4.84697	10.8674	12.1922	8.96366	2.1726e-08	1.61267e-07	1.05346	up
FBgn0262514	VhaPPA1-2	27	31	28	76	57	55	2.77977	3.20739	2.98714	8.83666	6.76228	6.3758	0.000237793	0.000771471	1.05376	up
FBgn0030013	GIIIspla2	1422	1821	1716	3493	3350	3259	44.4381	54.3331	57.0184	125.551	125.062	114.082	2.58764e-24	9.35649e-23	1.05399	up
FBgn0051287	CG31287	86	87	64	155	157	186	7.60888	7.65929	5.70899	12.5916	13.7371	15.6809	2.71886e-07	1.6394e-06	1.05497	up
FBgn0262788	CG43169	41	47	19	85	69	82	16.9021	17.7008	7.75149	30.7373	25.8523	28.2375	0.000354377	0.00110075	1.05563	up
FBgn0085217	CG34188	36	51	67	95	111	123	4.26276	5.64741	7.9006	11.0194	12.7068	14.0417	2.18632e-05	8.90789e-05	1.05585	up
FBgn0050039	CG30039	200	172	170	399	347	376	19.3538	16.0392	16.6205	37.6867	32.8464	34.6572	6.6936e-12	8.33353e-11	1.05615	up
FBgn0035144	Kah	35	33	25	62	67	74	0.466542	0.417699	0.355776	0.944975	1.03084	1.12784	0.000140883	0.000480248	1.05688	up
FBgn0036360	CG10713	16	23	23	37	59	44	0.248993	0.351	0.3715	0.647748	1.06143	0.77642	0.00117745	0.00323068	1.05745	up
FBgn0011762	DNApol-alpha50	342	333	400	732	787	692	10.5949	10.0364	13.3355	21.231	22.9058	20.0914	1.40213e-16	3.01803e-15	1.0578	up
FBgn0025821	I-t	54	56	46	112	110	109	3.53395	3.50829	3.16136	7.54153	7.44906	7.10779	2.54131e-06	1.24799e-05	1.05787	up
FBgn0032312	CG14071	25	52	34	88	74	79	2.01016	5.07697	3.1923	8.08731	7.2164	7.20266	0.000134197	0.000460319	1.05811	up
FBgn0037402	Vha14-2	30	37	31	59	79	75	1.42785	2.01675	1.26137	4.61091	6.15081	5.28768	0.000102257	0.000360025	1.05827	up
FBgn0013953	Esp	102	95	78	173	182	223	1.77233	1.55166	1.29194	3.38704	3.86945	4.26832	8.71392e-08	5.77554e-07	1.0584	up
FBgn0039283	danr	23	16	18	48	46	36	0.460324	0.317337	0.377336	1.11893	1.08206	0.815129	0.00130382	0.00353318	1.05991	up
FBgn0039209	REPTOR	325	189	218	592	455	500	2.70162	1.53459	1.87017	5.22094	3.83381	4.31187	6.16519e-08	4.21109e-07	1.06082	up
FBgn0028990	Spn27A	903	822	964	1785	1932	1811	13.7861	12.0078	15.5325	31.4825	34.8428	31.2994	2.05014e-22	6.51052e-21	1.06121	up
FBgn0031331	CG5440	18	33	35	70	67	53	1.60816	2.74815	3.20679	5.75231	5.96988	4.32033	0.000368781	0.00114006	1.06138	up
FBgn0015795	Rab7	1789	2159	1864	4013	3873	4014	62.4509	71.5052	69.1026	149.838	144.617	145.637	2.40237e-28	1.11056e-26	1.06168	up
FBgn0038342	B9d1	86	102	74	167	207	177	4.72375	5.39367	4.30741	10.3836	13.3102	10.8039	6.88017e-08	4.66455e-07	1.06208	up
FBgn0051007	CG31007	80	67	96	164	161	188	4.63202	3.86024	6.02293	11.534	12.0312	12.7126	1.63915e-07	1.03867e-06	1.06276	up
FBgn0038783	CG4367	896	1362	1134	2255	2337	2388	69.5423	100.356	88.3451	172.638	179.214	179.539	1.44503e-16	3.09818e-15	1.0636	up
FBgn0034480	CG16898	2903	3867	3276	6727	6841	7051	139.807	177.266	164.241	327.243	330.127	336.615	4.03448e-24	1.4398e-22	1.0646	up
FBgn0025574	Pli	385	316	317	754	720	641	6.98961	5.48998	5.88412	13.9076	13.1939	11.7193	4.46028e-14	7.19688e-13	1.0647	up
FBgn0050391	CG30391	23	20	25	39	48	67	0.665965	0.563721	0.770375	1.22371	1.52381	2.04649	0.000838628	0.00237846	1.06532	up
FBgn0036029	CG16719	73	74	60	174	136	130	3.25463	3.13704	2.79074	8.34081	6.64429	5.97022	7.77287e-07	4.2516e-06	1.0656	up
FBgn0037086	CG7202	120	110	114	232	212	278	6.1712	5.46455	6.13851	13.0659	12.5851	15.3428	2.72118e-09	2.34013e-08	1.06604	up
FBgn0260776	CG42570	40	58	36	90	105	94	1.37343	2.01137	1.30899	2.92856	3.60848	3.05172	1.94728e-05	8.00748e-05	1.0664	up
FBgn0051784	CG31784	57	91	66	122	179	155	1.26577	1.88045	1.49859	2.63099	3.81603	3.27929	2.49128e-06	1.22507e-05	1.06677	up
FBgn0086915	Mst77F	833	831	820	1694	1772	1652	36.7505	35.0432	37.0097	79.2092	83.8048	76.367	4.95346e-27	2.14506e-25	1.06745	up
FBgn0046880	Obp56b	72	103	120	176	228	219	10.7754	14.823	18.3767	26.7974	35.8358	32.6578	1.62755e-07	1.03191e-06	1.06762	up
FBgn0037500	CG17944	34	29	39	71	83	69	2.70499	2.16779	3.23106	5.93043	6.95227	5.38479	6.511e-05	0.000239619	1.06795	up
FBgn0052194	lncRNA:CR32194	96	125	131	230	264	243	18.7423	23.7349	27.8638	44.683	53.4333	43.6592	8.14134e-10	7.54623e-09	1.06874	up
FBgn0040670	e(y)2b	9	19	33	44	41	58	1.31292	2.82823	5.09403	5.73807	6.33715	7.91604	0.00273384	0.00682122	1.06898	up
FBgn0053318	CR33318	40	78	49	121	120	118	7.41432	14.125	9.13096	22.8626	23.2038	22.1747	1.05789e-05	4.60479e-05	1.07011	up
FBgn0262021	CG42832	185	244	203	454	415	446	719.621	911.337	795.762	1500.78	1562.31	1293.73	1.10701e-13	1.72278e-12	1.07155	up
FBgn0283728	CG31600	27	70	39	96	83	121	3.57414	8.78691	5.09116	11.894	9.99775	15.0207	0.000204004	0.000669984	1.07166	up
FBgn0040519	CG15219	347	445	337	739	815	790	76.8814	93.374	71.2169	149.05	163.861	156.39	4.74115e-16	9.53102e-15	1.07193	up
FBgn0032660	elfless	52	70	68	125	110	173	1.82839	2.2565	2.10884	4.36876	3.72932	6.13211	4.40382e-06	2.06808e-05	1.07209	up
FBgn0051072	Lerp	1498	1291	1314	2788	2835	2888	17.0021	13.9801	15.6177	35.1433	36.0998	35.9438	5.72298e-23	1.89429e-21	1.07241	up
FBgn0264543	CG43922	22	20	31	60	50	54	11.7159	10.4043	17.164	30.5289	27.0808	26.1079	0.000400177	0.00122433	1.07304	up
FBgn0030006	CG17982	116	171	102	255	263	304	4.09787	5.64451	3.55401	10.231	10.6713	11.6959	2.65335e-08	1.93801e-07	1.07323	up
FBgn0052302	CG32302	21580	30796	27953	54152	56185	55639	917.598	1272.64	1262.74	2701.39	2862.6	2694.55	3.97289e-21	1.17008e-19	1.07332	up
FBgn0039226	Ude	754	775	869	1622	1615	1725	16.2857	16.1709	20.5049	41.2815	41.715	42.2194	7.80799e-25	2.96001e-23	1.07338	up
FBgn0032769	CG10750	66	91	74	155	191	145	2.38927	3.14105	2.88897	6.34094	8.0769	5.68486	2.12949e-07	1.31071e-06	1.0734	up
FBgn0013770	Cp1	5552	6369	6317	12682	12555	12357	175.494	199.469	215.945	449.22	457.66	429.191	4.14437e-37	2.75186e-35	1.07354	up
FBgn0029658	CG14269	27	30	24	62	63	55	2.16332	2.35229	2.02463	5.24404	5.24147	4.56689	0.000171491	0.000571775	1.07486	up
FBgn0262568	CG43108	24	23	24	43	60	57	2.00012	2.2081	2.41889	3.66166	5.92205	5.344	0.000395163	0.00121102	1.07545	up
FBgn0038631	CG7695	119	92	138	236	232	273	10.3735	7.80473	12.3039	21.5628	21.4622	24.6619	1.05796e-08	8.27375e-08	1.07721	up
FBgn0034098	krimp	16	12	11	30	28	36	0.323792	0.222874	0.236819	0.620044	0.5748	0.70346	0.00324731	0.00793256	1.07803	up
FBgn0052846	CG32846	30	27	38	62	85	64	0.937157	0.816887	1.22909	2.22472	3.13562	2.20048	0.00012111	0.000419767	1.07837	up
FBgn0051041	CG31041	264	369	315	688	682	608	26.2615	42.935	40.0195	74.2664	87.4916	66.6757	5.52933e-15	9.86634e-14	1.07858	up
FBgn0039109	CG10365	969	953	860	1841	1975	1973	28.1268	26.7078	26.2186	60.4474	65.9555	63.6446	1.54637e-24	5.74306e-23	1.07933	up
FBgn0028858	CG10839	35	60	38	98	88	104	1.59933	2.4791	1.71626	4.98308	4.5602	5.12564	2.18088e-05	8.89233e-05	1.07967	up
FBgn0030679	CG8206	1900	2594	2506	4917	4829	4787	68.6227	93.0191	93.3019	203.114	209.233	197.581	6.93376e-22	2.15202e-20	1.07997	up
FBgn0035501	CG1299	392	373	360	781	824	744	8.4112	7.67488	8.06623	19.5822	20.9449	18.4984	3.67752e-19	9.6853e-18	1.08015	up
FBgn0261395	Prosalpha3T	29	20	19	52	54	49	1.97532	1.3472	1.40208	3.87988	4.13461	3.56208	0.000494212	0.00148183	1.08015	up
FBgn0051952	CG31952	45	48	49	105	98	104	1.25662	1.33943	1.30085	3.27962	3.07719	3.30109	2.55655e-06	1.25491e-05	1.08115	up
FBgn0005778	PpD5	71	85	67	170	146	160	3.12771	3.65296	3.08415	8.17762	7.13585	7.54828	6.35931e-08	4.33018e-07	1.0816	up
FBgn0026136	CkIIbeta2	49	55	62	105	144	110	3.75113	4.04274	4.90303	8.24383	11.4766	8.43376	2.62064e-06	1.28464e-05	1.08181	up
FBgn0050093	COX6AL	29	26	37	69	58	78	4.42342	3.78195	5.64258	10.5716	9.42849	11.5846	0.000119578	0.000414933	1.08232	up
FBgn0037291	CG14662	24	45	11	76	57	55	1.07191	1.45357	0.407645	2.77583	2.32731	1.94575	0.00181006	0.00474653	1.08316	up
FBgn0030398	Cpr11B	150	247	187	379	472	383	11.9703	18.9462	15.537	32.7507	41.8089	32.5758	6.69923e-10	6.30557e-09	1.08327	up
FBgn0002734	E(spl)mdelta-HLH	12	11	12	27	36	23	0.632273	0.548918	0.660528	1.54757	2.02991	1.30184	0.00415151	0.00986208	1.08351	up
FBgn0003132	Pp1-13C	67	74	58	146	149	132	1.71915	1.8141	1.5434	4.04017	4.15988	3.6044	1.75426e-07	1.10522e-06	1.08374	up
FBgn0037515	Sp7	280	316	300	599	655	620	8.01414	9.18715	10.0549	20.4137	22.6759	20.9958	9.90051e-19	2.51671e-17	1.08414	up
FBgn0033285	CG18449	211	200	212	454	444	412	13.7706	12.3713	14.0595	30.9351	30.5399	27.3879	4.77222e-15	8.62779e-14	1.08508	up
FBgn0264433	CG43851	16	23	11	37	44	37	3.44498	4.76957	2.32131	7.36016	8.9696	6.9714	0.00174033	0.00458013	1.08551	up
FBgn0037986	CG14736	33	40	25	94	68	58	0.914955	1.05736	0.755134	2.82002	2.04439	1.637	0.000174651	0.00058125	1.08589	up
FBgn0020416	Idgf1	536	580	519	1078	1133	1207	20.5679	21.5147	20.751	44.0704	46.6912	48.6102	8.90423e-23	2.8948e-21	1.08614	up
FBgn0031296	CG4415	112	139	120	262	264	259	2.52532	2.92273	2.94287	7.26814	7.5362	6.61746	2.47172e-11	2.8238e-10	1.08719	up
FBgn0034162	CG6426	1155	1607	1693	3040	3214	3067	113.469	153.584	169.823	320.606	347.769	308.34	7.36248e-18	1.77282e-16	1.08741	up
FBgn0050430	CG30430	190	193	149	346	365	417	119.762	114.443	95.7192	198.597	223.989	227.566	1.57417e-11	1.86047e-10	1.0879	up
FBgn0250844	CG4218	206	188	215	426	452	407	11.2482	9.75713	12.5329	23.1068	24.1971	22.0376	1.79009e-14	3.02659e-13	1.08849	up
FBgn0025885	Inos	3769	3457	3614	7391	7920	7372	65.384	57.8693	67.4265	156.269	172.941	150.626	3.74975e-30	1.84226e-28	1.08908	up
FBgn0037514	CG10919	60	77	62	122	167	141	5.17112	6.21459	5.49165	10.6112	14.9194	11.833	4.50764e-07	2.60473e-06	1.08989	up
FBgn0050429	CG30429	59	49	57	121	118	119	3.67949	2.9088	3.70014	7.4774	7.20923	7.16606	7.2751e-07	4.0013e-06	1.08996	up
FBgn0037506	Mics1	89	76	63	168	144	181	4.0058	3.26944	2.9546	8.30247	7.20459	8.78902	2.14095e-07	1.31703e-06	1.09001	up
FBgn0034904	CG15800	38	22	55	76	98	86	3.94545	2.23327	6.13383	8.66486	11.5491	9.40569	0.000175926	0.000585315	1.09052	up
FBgn0014427	CG11899	631	695	701	1328	1515	1407	24.7267	26.3009	29.182	59.2308	68.9858	61.1603	6.66734e-25	2.5452e-23	1.09216	up
FBgn0033461	CG12923	44	47	44	121	82	94	1.23016	1.24171	1.28005	3.58095	2.4496	2.72258	1.03668e-05	4.52502e-05	1.09267	up
FBgn0266962	CG45413	18	30	20	51	60	45	2.01416	3.55434	2.36997	5.29748	7.38402	4.96126	0.000478498	0.00143983	1.09273	up
FBgn0051482	CG31482	48	60	58	94	123	146	4.11729	4.85508	5.18238	8.12676	10.6485	12.1954	3.63259e-06	1.73188e-05	1.09372	up
FBgn0035014	CG13581	30	35	49	97	63	95	2.14068	2.40598	3.47513	7.25193	4.8159	6.87934	7.61416e-05	0.000275954	1.0942	up
FBgn0032530	CG9263	20	16	33	68	49	44	1.69288	1.2968	2.7696	5.78659	4.3387	3.71294	0.000833964	0.00236707	1.09464	up
FBgn0038567	CG14316	28	40	49	60	99	104	1.24111	1.66547	2.21935	2.65424	4.3499	4.52177	0.0001082	0.000379339	1.0958	up
FBgn0015037	Cyp4p1	903	1142	967	2081	2168	2081	28.7546	34.5496	32.9986	71.1997	73.9603	68.7437	3.43702e-25	1.33532e-23	1.09709	up
FBgn0046879	Obp56c	19	24	42	69	78	49	1.00025	1.21954	2.33427	3.80317	4.37773	2.62228	0.00047521	0.0014319	1.09796	up
FBgn0267383	Ubc87F	72	114	116	190	238	224	6.33135	9.47829	10.902	18.2512	24.3623	20.6225	3.24282e-08	2.33126e-07	1.10116	up
FBgn0029656	CG10793	39	40	46	102	97	78	1.25734	1.2284	1.5412	3.44341	3.27785	2.59154	8.83017e-06	3.90724e-05	1.10211	up
FBgn0040296	Ocho	29	23	29	63	59	62	0.962661	0.736004	1.04403	2.41288	2.31575	2.25664	0.000112793	0.000393303	1.10222	up
FBgn0041711	yellow-e	386	420	310	801	783	791	10.8936	11.4357	9.21661	25.2171	25.3145	24.5207	2.58966e-16	5.37379e-15	1.10372	up
FBgn0263647	CG43638	70	105	56	165	156	185	5.26563	7.35611	4.33966	12.4917	11.8603	13.4762	8.24234e-07	4.48599e-06	1.10503	up
FBgn0023495	Lip3	44	38	23	67	82	90	1.40772	1.17924	0.780747	2.39764	2.98872	3.17259	9.16498e-05	0.000325906	1.10556	up
FBgn0262478	CG43068	40	29	31	84	68	74	4.21935	2.89275	3.42291	9.23857	7.54415	7.98142	4.50838e-05	0.000171447	1.10654	up
FBgn0040904	CG15577	27	33	12	62	42	67	4.35648	5.08116	1.9975	10.0325	6.98287	10.1951	0.000967823	0.0027105	1.10675	up
FBgn0267457	asRNA:CR45807	178	215	179	405	406	410	6.69657	7.81332	7.10703	17.0794	17.4848	16.8251	6.62599e-15	1.16711e-13	1.10719	up
FBgn0267363	JYalpha	44	58	57	109	100	142	1.12359	1.39566	1.48179	2.63166	2.33057	3.34543	2.65218e-06	1.29836e-05	1.10754	up
FBgn0039511	CG3330	189	116	196	370	353	367	7.74625	4.53143	8.13357	15.6095	15.0634	15.3198	5.28003e-09	4.34947e-08	1.10763	up
FBgn0037431	CG17917	60	82	72	117	166	187	4.894	6.15307	5.73607	10.041	14.9621	15.5405	8.36126e-07	4.53719e-06	1.10771	up
FBgn0035455	CG10862	102	138	133	267	283	252	4.51201	5.87053	6.22278	13.0337	13.9497	11.9803	5.06035e-11	5.51105e-10	1.1084	up
FBgn0000071	Ama	325	273	267	609	646	597	7.87947	6.42587	6.91652	17.7653	19.3661	17.0988	9.59755e-16	1.87435e-14	1.1085	up
FBgn0035569	CG15876	27	48	31	62	79	100	2.1858	3.75125	2.6727	5.65695	7.49193	8.84371	0.000101658	0.000358238	1.10942	up
FBgn0039029	CG4704	18	15	15	53	36	28	0.721421	0.422502	0.51137	1.62814	1.21479	0.906012	0.00172743	0.00455164	1.11082	up
FBgn0051740	CG31740	503	621	617	1202	1228	1268	77.0402	91.0129	94.5272	187.328	189.905	192.284	2.03623e-23	6.90679e-22	1.11085	up
FBgn0050099	CG30099	93	107	95	205	207	226	7.8489	9.25854	9.07406	19.6545	19.9155	21.4854	2.58454e-10	2.56213e-09	1.11139	up
FBgn0032371	CG4983	89	77	118	240	195	187	3.45093	2.82419	4.53529	9.3958	7.85312	7.34127	4.83047e-08	3.36444e-07	1.11358	up
FBgn0030283	CG15198	67	73	82	201	141	146	7.19668	7.44638	8.95844	22.4792	16.1747	15.8612	1.9344e-07	1.20348e-06	1.11439	up
FBgn0031345	CG18132	41	6	24	49	74	59	4.83679	0.767677	2.84338	5.6606	8.49799	6.67731	0.00339686	0.00826471	1.11536	up
FBgn0051806	CG31806	24	42	35	77	85	67	3.40277	5.82256	4.75666	10.7037	11.3726	7.91127	4.65811e-05	0.000176467	1.1159	up
FBgn0034554	CAH14	51	42	30	96	98	84	2.27937	1.81688	1.44436	4.69204	4.78107	3.93602	1.67506e-05	6.96132e-05	1.11606	up
FBgn0002629	E(spl)m4-BFM	39	51	41	79	95	120	2.32927	2.91534	2.75476	5.56666	7.132	7.96048	1.0473e-05	4.56776e-05	1.11642	up
FBgn0263387	CG43439	210	201	156	424	396	406	12.6928	11.5871	9.72658	25.8034	24.0377	24.1619	1.00021e-12	1.38713e-11	1.11667	up
FBgn0030310	PGRP-SA	157	239	219	467	414	444	14.0928	20.4693	20.3429	46.4776	42.7574	43.282	1.59071e-12	2.13577e-11	1.11748	up
FBgn0003312	sad	121	94	116	239	274	211	3.03259	2.27985	3.02045	6.91077	8.13919	6.03835	1.9998e-09	1.757e-08	1.11844	up
FBgn0026582	Hmg-2	66	65	74	144	157	149	1.46435	1.37738	1.74692	3.76368	4.25108	3.7878	2.37465e-08	1.75078e-07	1.11873	up
FBgn0035855	CG7366	70	71	66	151	160	144	2.21919	2.17882	2.21884	5.33219	5.75028	4.95924	1.87365e-08	1.40987e-07	1.1209	up
FBgn0034423	tbrd-2	70	70	60	173	124	146	1.34052	1.28889	1.20102	3.55633	2.56427	2.94655	2.04621e-07	1.26701e-06	1.12185	up
FBgn0265257	CG44271	36	24	30	52	79	78	6.67363	4.37689	5.75453	9.75058	15.1511	14.1752	0.00012163	0.000421168	1.12228	up
FBgn0030207	CG2887	20	24	30	65	53	54	0.7651	0.870805	1.16119	2.66412	2.20772	2.1695	0.000163761	0.000548674	1.12355	up
FBgn0037456	CG1138	44	40	44	105	82	101	2.14659	1.8453	2.12346	4.81302	3.69382	4.64637	4.23835e-06	1.99722e-05	1.12401	up
FBgn0037910	CG14708	59	74	39	136	116	134	5.94014	7.19716	3.98569	13.6272	11.6372	13.1676	2.80254e-06	1.36587e-05	1.12508	up
FBgn0036218	Sprn	97	152	106	259	247	270	2.43426	3.58741	2.77848	6.58247	6.22568	6.87689	8.9105e-10	8.21055e-09	1.12566	up
FBgn0034156	CG5348	22	9	13	47	27	38	0.792508	0.327714	0.49659	1.70139	0.971507	1.34973	0.00253344	0.00638564	1.12711	up
FBgn0037388	CG14676	46	52	57	128	109	109	3.15918	2.57451	1.98774	8.83018	4.64918	4.95477	5.72242e-07	3.22836e-06	1.12818	up
FBgn0035800	CG7716	81	82	57	195	139	157	1.83928	1.78555	1.36706	4.64077	3.28005	3.65514	3.10079e-07	1.84231e-06	1.12881	up
FBgn0262004	CG42822	55	70	85	159	123	187	6.7811	8.35779	11.0237	20.1229	15.7943	22.6821	6.45919e-07	3.60084e-06	1.12974	up
FBgn0052847	CG32847	29	16	19	40	39	79	3.09869	1.65731	2.09732	4.23394	4.25343	8.06813	0.00120456	0.00329517	1.12995	up
FBgn0031442	Prosbeta4R1	61	47	62	122	119	140	4.6026	3.39176	4.86495	9.89243	9.81203	10.8745	4.06802e-07	2.3707e-06	1.13165	up
FBgn0034846	CG9863	24	30	38	56	79	78	1.02421	1.23306	1.68467	2.73183	3.96806	3.70041	6.94279e-05	0.000253974	1.13171	up
FBgn0051659	CG31659	121	80	89	194	233	219	7.9339	4.45711	6.01198	13.4833	16.5569	14.9002	2.05035e-08	1.52918e-07	1.13282	up
FBgn0050376	CG30376	215	266	219	496	524	499	8.5196	10.2979	8.99758	22.5668	24.5549	22.1101	7.49023e-17	1.64455e-15	1.13286	up
FBgn0004175	Mst84Dd	257	309	229	534	589	606	91.6002	106.413	82.0763	187.092	214.033	202.251	1.81816e-15	3.42853e-14	1.13301	up
FBgn0032629	beat-IIIc	14	8	17	28	34	37	0.218175	0.160923	0.281739	0.417557	0.536835	0.716956	0.00218825	0.00562145	1.13371	up
FBgn0262993	lncRNA:CR43301	14	26	13	46	39	44	0.623866	1.11014	0.636803	1.99229	1.65546	1.87063	0.000857969	0.00243017	1.1345	up
FBgn0265265	CG32727	12	15	34	58	36	57	2.22084	2.63266	6.13333	10.3017	6.4435	9.94875	0.00140731	0.00378645	1.13451	up
FBgn0028978	trbl	386	309	474	887	854	817	7.10685	5.76537	9.73635	15.9451	17.8188	14.8417	8.93277e-14	1.40412e-12	1.13539	up
FBgn0262878	CG43233	16	5	19	29	31	45	3.21242	1.07147	3.99896	5.95305	6.4272	8.85458	0.00348002	0.00844267	1.13623	up
FBgn0032632	CG6380	71	59	63	125	155	152	3.29996	2.47739	2.90295	5.94152	7.36789	7.19125	9.17487e-08	6.04813e-07	1.13632	up
FBgn0032268	CG6138	56	40	35	90	92	119	4.54002	3.11688	3.00443	7.80702	8.13333	9.8342	1.13717e-05	4.92247e-05	1.13702	up
FBgn0038090	CG10909	33	40	28	78	74	80	1.66512	1.89519	1.46284	4.04507	3.86484	4.02517	1.63742e-05	6.81855e-05	1.1379	up
FBgn0265498	asRNA:CR44367	38	60	55	105	129	111	1.79312	2.8119	2.87124	5.59314	7.51454	6.22748	1.30086e-06	6.75353e-06	1.13794	up
FBgn0038694	CG5217	60	88	80	189	164	154	2.51674	3.53673	3.61848	8.78511	7.81291	6.92698	2.4913e-08	1.82817e-07	1.13814	up
FBgn0260429	CG42524	54	41	55	131	123	88	1.22806	0.849269	1.57446	3.28197	2.88609	2.14413	3.81094e-06	1.80669e-05	1.13888	up
FBgn0032364	CG4970	48	37	36	86	95	96	1.09539	0.853815	1.31585	5.06091	3.85156	3.92348	4.98438e-06	2.31394e-05	1.14076	up
FBgn0032650	CG7094	78	56	84	157	181	152	2.87125	1.94778	3.25211	6.02002	7.04498	5.64295	8.3965e-08	5.58883e-07	1.14151	up
FBgn0033518	Prx2540-2	153	116	153	301	324	308	8.57135	6.24067	9.04402	19.57	21.8012	19.6261	1.1539e-11	1.38165e-10	1.14199	up
FBgn0033188	Drat	2669	2374	2671	5684	5625	5454	50.1583	43.5853	52.3791	127.542	131.734	121.723	1.69787e-30	8.45541e-29	1.14205	up
FBgn0038082	Ugt37A2	362	477	369	878	931	825	10.0909	12.6771	11.0519	27.054	28.8508	24.5965	2.50847e-18	6.23192e-17	1.14224	up
FBgn0051741	CG31741	16	15	23	45	43	43	0.394533	0.40044	0.587979	1.1852	1.13072	1.25492	0.000500047	0.00149744	1.14238	up
FBgn0032003	CG8349	46	77	58	142	111	156	2.32572	3.72388	3.03191	7.88703	6.2919	8.39143	1.05883e-06	5.62312e-06	1.14246	up
FBgn0038901	Burs	78	82	88	175	195	181	2.02469	2.49596	2.27817	3.25561	3.29692	2.96676	7.7347e-10	7.18147e-09	1.14349	up
FBgn0031558	CG16704	1068	1547	1499	3030	2990	2931	739.297	1004.01	992.168	1861.17	1946.72	1717.95	4.68322e-20	1.29897e-18	1.14375	up
FBgn0031939	CG13796	87	56	66	176	162	136	2.25822	1.40148	1.74315	4.69354	4.29091	3.59663	3.08951e-07	1.8376e-06	1.1448	up
FBgn0035589	CHMP2B	472	698	628	1301	1337	1283	19.1055	27.0616	27.7504	61.3512	65.4358	57.2127	1.27503e-18	3.19663e-17	1.14498	up
FBgn0035786	Tsp66A	55	55	46	119	120	114	2.51787	2.52608	2.19674	4.90041	5.38558	4.99606	2.5006e-07	1.52288e-06	1.14671	up
FBgn0031554	CG15418	38	73	47	118	129	113	7.50986	12.2534	8.63464	23.3511	24.3762	20.0753	2.52122e-06	1.23868e-05	1.14746	up
FBgn0036465	Rpn12R	51	47	58	119	136	100	3.27437	2.84669	3.96627	8.01986	9.21798	6.57392	6.81645e-07	3.76796e-06	1.14867	up
FBgn0036327	CG10748	55	51	73	143	118	145	3.21298	2.87729	4.39194	8.79102	7.24341	8.8128	2.63616e-07	1.59656e-06	1.15026	up
FBgn0267726	CG46059	242	242	215	510	491	537	124.875	117.982	108.565	234.295	235.217	241.835	1.68067e-17	3.94291e-16	1.15036	up
FBgn0035069	CG3611	11	38	20	48	69	53	0.544497	1.57082	1.20627	2.69242	4.12628	2.93553	0.000802072	0.00228306	1.1509	up
FBgn0037516	CG11286	14	13	12	37	28	34	1.39469	1.25007	1.19562	3.5677	2.78615	3.22854	0.00140503	0.00378127	1.15113	up
FBgn0260870	CG42580	27	31	26	51	64	84	6.22254	7.09356	6.46104	12.0388	15.7096	18.8668	8.3494e-05	0.000299235	1.15189	up
FBgn0035657	alphaKap4	30	26	25	63	68	60	1.38498	1.06158	1.21134	2.70214	3.09633	2.30912	4.57086e-05	0.000173702	1.15323	up
FBgn0040342	CG3706	215	233	270	497	556	529	4.77052	5.02716	6.40387	13.3456	15.3919	13.8027	4.22241e-17	9.57778e-16	1.15338	up
FBgn0033512	CG12902	230	283	248	544	507	627	15.0382	17.4955	18.144	39.9413	37.0693	43.7963	2.6614e-16	5.51196e-15	1.15395	up
FBgn0039463	Spag1	80	102	99	201	205	221	2.04733	2.49118	2.66485	5.36151	5.4828	5.76953	1.4723e-10	1.49911e-09	1.15412	up
FBgn0063261	CG31275	23	35	18	71	38	77	3.08305	4.55371	2.48123	9.59687	5.32826	9.99577	0.000438413	0.00132907	1.15571	up
FBgn0050151	CG30151	121	139	98	258	238	306	8.50265	9.25214	7.25051	18.7271	16.9491	21.0547	3.23148e-10	3.1781e-09	1.156	up
FBgn0267422	CR45775	12	12	8	35	29	21	1.48003	1.42708	1.01781	4.04692	3.48518	2.42324	0.00280879	0.00698277	1.15683	up
FBgn0038054	CG5509	40	48	29	68	92	115	3.29422	3.77051	2.44955	5.75296	7.87552	9.6384	2.78733e-05	0.000110926	1.15717	up
FBgn0036438	goddard	100	109	105	205	253	244	12.8991	13.552	13.9012	27.2806	34.5262	31.3258	4.19981e-11	4.63841e-10	1.15729	up
FBgn0028884	CG4892	20	30	34	57	84	59	1.17163	1.61973	1.98626	3.33633	4.94411	3.35523	9.4186e-05	0.000333841	1.15759	up
FBgn0051851	Naa20B	200	214	218	448	495	454	3.77534	4.59624	4.57138	7.95266	9.11681	7.49252	9.77755e-18	2.32876e-16	1.15809	up
FBgn0000022	ac	7	19	9	36	23	34	0.447017	1.10872	0.610317	2.24888	1.49765	2.10222	0.00302169	0.0074512	1.15832	up
FBgn0243514	eater	153	167	155	379	348	328	2.57627	2.94018	3.01835	6.89041	6.73132	6.40983	1.11444e-14	1.91978e-13	1.15936	up
FBgn0050065	CG30065	55	76	56	153	161	113	5.61561	7.37992	5.81042	15.4915	16.8352	10.9793	3.11903e-07	1.85215e-06	1.1594	up
FBgn0032740	CG15172	91	70	102	156	250	195	12.6642	9.06719	14.2502	21.6574	35.9198	26.8649	1.36477e-07	8.77492e-07	1.15982	up
FBgn0051848	CG31848	22	31	23	58	74	50	1.86969	2.61261	2.0221	5.291	6.88991	4.54017	0.000104632	0.000367775	1.16083	up
FBgn0262982	CG43290	29	20	20	57	57	53	4.87291	3.20891	3.45701	8.67553	8.83975	7.66934	0.000127739	0.000440235	1.16375	up
FBgn0266408	lncRNA:CR45048	18	17	7	47	31	32	0.594628	0.591869	0.249574	1.57125	1.01649	1.05089	0.00177553	0.0046694	1.1659	up
FBgn0033238	azot	40	82	31	129	134	100	1.65009	4.06555	1.35214	5.97037	6.93393	4.7706	3.98676e-05	0.000153152	1.16803	up
FBgn0053665	CG33665	60	87	74	148	189	166	8.50701	12.1404	10.7319	20.8552	25.5425	22.8816	1.37617e-08	1.0588e-07	1.16851	up
FBgn0265342	CG44296	46	85	47	136	141	134	19.1874	33.4275	19.6529	52.8463	56.7123	49.8515	1.0139e-06	5.41341e-06	1.16855	up
FBgn0032492	Prosalpha6T	51	62	49	110	118	145	2.50504	2.88437	2.52183	6.00103	6.56734	7.65374	2.58781e-07	1.57162e-06	1.1691	up
FBgn0038241	CG8087	98	172	144	321	272	342	17.9836	30.8823	27.0461	60.8386	54.6175	62.7408	6.72022e-10	6.31989e-09	1.17003	up
FBgn0063497	GstE3	1540	1917	1754	3751	3913	3845	117.419	142.028	144.851	328.955	346.929	323.986	1.57787e-33	9.19529e-32	1.17028	up
FBgn0034756	Cyp6d2	413	484	468	959	959	1115	10.066	11.2126	12.0643	26.3824	26.7134	29.8814	8.87842e-23	2.8948e-21	1.17183	up
FBgn0028880	CG15256	40	44	49	90	101	118	2.73414	3.46233	3.46212	7.06909	8.04432	8.7662	1.05054e-06	5.58726e-06	1.17188	up
FBgn0031689	Cyp28d1	472	550	437	1039	1131	1075	13.5735	15.1657	13.1837	32.8381	36.248	33.2216	9.36081e-23	3.02699e-21	1.17234	up
FBgn0033330	CG8746	62	65	71	140	157	155	2.09903	2.09032	2.52317	5.38549	6.17853	5.81803	6.23908e-09	5.08218e-08	1.17241	up
FBgn0053189	CG33189	73	60	69	132	157	175	6.70262	5.37316	6.57283	13.1409	15.9318	16.5526	3.0396e-08	2.19814e-07	1.17254	up
FBgn0034295	CG10911	1190	1276	1226	2755	2752	2670	53.8727	55.2172	60.0235	142.657	145.261	133.681	5.94084e-39	4.11949e-37	1.17385	up
FBgn0035977	PGRP-LF	39	55	38	114	106	88	1.61206	2.16007	1.61138	5.02414	4.70094	3.77988	1.95913e-06	9.79655e-06	1.17418	up
FBgn0036436	CG4914	33	24	38	82	87	59	0.83271	0.59409	0.990238	2.27435	2.41107	1.58936	3.49795e-05	0.000136189	1.17517	up
FBgn0030722	CG12395	23	16	24	46	55	54	1.53883	1.03346	1.65579	3.07317	3.65207	3.47887	0.000168158	0.00056203	1.17616	up
FBgn0034475	Obp56h	86	77	85	189	194	182	10.8119	10.8373	12.725	25.8658	28.9297	23.9908	2.40794e-10	2.3983e-09	1.17687	up
FBgn0031559	CG3513	81	196	132	309	358	275	20.9521	41.5831	34.3742	67.2186	89.5902	63.7514	1.97478e-07	1.22538e-06	1.17829	up
FBgn0033708	CG8850	27	27	22	62	55	67	0.749435	0.823802	0.695176	2.06696	1.84903	1.99565	4.47703e-05	0.000170432	1.18209	up
FBgn0036772	CG5290	298	333	329	732	740	680	4.2165	4.52694	4.97428	11.5391	11.7689	10.4918	4.80377e-23	1.60948e-21	1.1836	up
FBgn0067783	DPCoAC	485	583	611	1205	1253	1299	10.6004	11.7963	13.6121	29.9669	32.5597	30.7924	1.6958e-25	6.78073e-24	1.18421	up
FBgn0034352	CG17669	41	47	31	92	101	88	1.05469	1.13527	0.860951	2.65694	2.96481	2.45225	2.45661e-06	1.20856e-05	1.18423	up
FBgn0262944	lncRNA:CR43263	44	26	24	70	87	72	2.63745	1.41387	1.49166	4.17499	5.31413	4.41607	4.38004e-05	0.000167146	1.18424	up
FBgn0002733	E(spl)mbeta-HLH	160	235	219	478	412	498	7.70595	11.0081	11.1494	26.7765	23.8071	27.1017	8.24283e-14	1.2994e-12	1.1844	up
FBgn0030449	Fer3HCH	20	35	35	61	78	78	1.68288	2.74089	2.9067	5.15487	6.66507	6.30435	3.08969e-05	0.000121677	1.18666	up
FBgn0031749	CG14000	14	23	23	32	63	57	0.536613	0.829135	0.88576	1.33023	2.58519	2.26433	0.000443534	0.00134348	1.18683	up
FBgn0051802	CG31802	95	35	116	181	184	234	6.53281	2.31445	8.51242	13.4907	14.0893	16.6271	2.98636e-05	0.00011782	1.18884	up
FBgn0051679	Tengl3	99	106	118	234	271	233	3.80555	4.66517	5.30356	11.7918	12.203	9.6861	5.28313e-12	6.69155e-11	1.18937	up
FBgn0036441	CG13476	68	98	77	217	154	191	7.07128	9.54067	8.13566	22.3216	15.9686	18.9625	1.07515e-08	8.38985e-08	1.18972	up
FBgn0029730	boil	73	63	24	130	125	135	2.61623	2.13727	0.891428	4.60937	4.42511	4.69699	3.13497e-05	0.000123151	1.19028	up
FBgn0026175	SkpC	22	16	26	51	50	58	1.99917	1.44989	2.63778	5.16065	5.34823	5.66731	0.000128122	0.000441417	1.19122	up
FBgn0034478	CG10822	75	78	53	175	172	134	11.6848	11.7776	8.3469	26.7853	26.9733	20.0975	5.4838e-08	3.78579e-07	1.19134	up
FBgn0032648	CG15144	48	26	52	91	103	109	0.549062	0.284272	0.636924	1.12614	1.27491	1.3097	8.01764e-06	3.57369e-05	1.19135	up
FBgn0036703	CG7707	50	49	46	122	104	114	2.55615	2.45509	2.43521	6.65229	5.7933	6.15157	1.5563e-07	9.89025e-07	1.19213	up
FBgn0026174	SkpD	24	44	29	80	84	70	2.10133	3.63491	2.68896	7.58971	8.13801	6.39682	1.60389e-05	6.69419e-05	1.19489	up
FBgn0033204	CG2065	828	1142	1141	2328	2379	2308	30.6995	39.8214	45.0753	96.4228	99.165	92.7385	2.65983e-23	8.99418e-22	1.19515	up
FBgn0051406	CG31406	48	59	71	169	105	146	2.11528	2.47924	3.28785	7.81165	4.91222	6.48309	5.30495e-07	3.01145e-06	1.19602	up
FBgn0038123	CG8508	19	16	24	58	38	53	1.06958	0.848976	1.37298	3.35145	2.20391	2.99649	0.000229166	0.000745636	1.19651	up
FBgn0261538	CG42662	371	507	436	989	957	1025	65.7357	86.1528	80.7886	174.556	179.602	176.473	6.51236e-22	2.02697e-20	1.1967	up
FBgn0053309	CG33309	56	62	46	144	121	120	1.80226	1.83956	1.53195	4.40097	3.63714	3.59622	8.77666e-08	5.8101e-07	1.19682	up
FBgn0040368	eIF4E7	57	88	55	155	160	152	1.38949	2.01611	1.4328	4.08691	4.24715	3.87284	3.19394e-08	2.29914e-07	1.19732	up
FBgn0030664	CG8119	7	13	9	24	28	28	0.543009	0.975304	0.747397	1.93459	2.33033	2.18676	0.0021531	0.00554	1.19772	up
FBgn0033301	CG12780	108	163	153	309	322	341	30.6001	44.0296	43.661	84.54	89.921	88.065	1.05826e-12	1.45841e-11	1.19942	up
FBgn0032304	CG17134	1238	1740	1525	3362	3439	3400	47.2615	64.5809	61.5933	144.588	150.569	142.757	6.24228e-26	2.57107e-24	1.20349	up
FBgn0002862	Mst87F	387	533	452	1060	1041	1016	132.813	176.065	152.953	350.071	357.911	324.657	2.39684e-22	7.56764e-21	1.20375	up
FBgn0035970	CG4483	9	11	18	29	41	32	0.406795	0.434254	0.805083	1.27934	1.77138	1.33001	0.00111967	0.00308608	1.20494	up
FBgn0265576	CG44403	28	19	22	43	64	67	1.32418	0.853197	1.01132	1.91647	2.85029	2.95545	0.000110839	0.000387845	1.20658	up
FBgn0051988	CG31988	471	459	431	1124	990	992	24.5944	23.0099	22.9051	60.9902	55.3944	53.0528	3.27319e-24	1.17577e-22	1.20736	up
FBgn0040963	CG18662	108	110	117	256	240	279	13.2233	12.6895	14.6217	31.2521	29.5771	32.4079	5.38438e-13	7.69117e-12	1.20861	up
FBgn0051913	CG31913	38	31	38	77	99	83	1.64744	1.32398	1.82829	4.00051	5.37275	4.12463	2.99449e-06	1.44846e-05	1.20924	up
FBgn0037572	CG11698	18	35	23	46	67	78	0.841664	1.61054	1.11722	2.42167	3.60957	3.90418	0.000111492	0.000389557	1.20986	up
FBgn0030103	Obp8a	18	15	6	42	29	36	1.13129	1.32637	0.325537	2.71359	2.08765	2.37715	0.00134468	0.00363313	1.21059	up
FBgn0032624	CG6304	145	123	140	292	317	336	4.17763	3.46774	4.46449	8.95637	9.6486	9.90761	6.9634e-14	1.10407e-12	1.2109	up
FBgn0035146	CG13893	302	322	306	684	708	734	4.80385	4.86084	5.22995	12.5032	13.2186	13.0021	2.35194e-24	8.56075e-23	1.21093	up
FBgn0001285	Jon44E	11462	14733	14352	30221	30760	31176	370.634	454.702	490.048	1118.95	1167.91	1130.36	3.60098e-34	2.16771e-32	1.21158	up
FBgn0086656	shrb	1018	1096	1011	2337	2370	2404	30.6389	31.485	32.674	78.5653	80.859	78.2931	1.26692e-38	8.72976e-37	1.21162	up
FBgn0051858	t-cup	11	15	11	43	31	26	1.30684	1.71211	1.3141	5.04691	3.55569	2.92714	0.00105789	0.00293348	1.21214	up
FBgn0050487	CG30487	46	103	79	151	202	190	4.33323	9.03422	7.59479	13.8806	18.9385	16.7403	3.32921e-07	1.97161e-06	1.21377	up
FBgn0051642	CG31642	78	110	143	242	238	298	1.85714	2.50599	3.48472	6.26021	6.26819	7.61326	2.34396e-09	2.0349e-08	1.21567	up
FBgn0028582	lqf	1188	964	1086	2454	2573	2416	12.3973	9.74082	12.0128	28.5193	29.6947	27.298	1.80145e-25	7.15097e-24	1.21583	up
FBgn0036876	CG9451	337	383	416	932	819	856	7.34964	9.89462	11.691	29.2588	26.3404	25.7688	5.60411e-23	1.86056e-21	1.21654	up
FBgn0038194	Cyp6d5	722	904	861	1970	1962	1764	19.3973	23.0342	24.3586	56.8949	57.5216	49.9497	1.36471e-28	6.36244e-27	1.21879	up
FBgn0025833	CG8910	8	11	7	20	24	31	0.101248	0.125666	0.0910728	0.271816	0.340496	0.412668	0.00236503	0.00600493	1.22062	up
FBgn0042198	CG16741	24	41	12	63	83	54	3.6913	6.03098	1.84106	9.6475	12.9756	8.11749	0.000275128	0.000878037	1.22073	up
FBgn0047351	CG31468	257	307	277	687	609	642	97.0824	111.716	90.3591	230.368	229.336	221.325	1.24782e-21	3.80811e-20	1.22078	up
FBgn0260996	CG42597	16	23	23	42	63	53	2.7364	3.85505	4.02538	7.19845	10.877	8.8129	0.000111266	0.000388969	1.22148	up
FBgn0031560	CG16713	1320	1982	1666	3771	3715	3956	883.127	1307.48	1155.72	2417.6	2642.47	2318.38	1.20201e-22	3.85064e-21	1.2245	up
FBgn0028534	CG7916	2026	2838	2732	5635	5790	6050	117.764	157.638	172.063	370.37	388.922	379.551	1.33748e-25	5.3873e-24	1.22491	up
FBgn0036085	CG6527	46	100	68	174	135	209	3.078	6.60038	5.03922	12.8802	9.70549	15.0947	7.3805e-07	4.05114e-06	1.22791	up
FBgn0034681	CG9308	20	49	26	86	75	77	1.31629	2.99086	1.83124	5.95825	5.4909	5.08664	3.1832e-05	0.000124904	1.22854	up
FBgn0033798	CG15870	28	19	23	54	54	70	3.28585	2.27481	2.83146	6.98972	7.12639	8.93156	4.98945e-05	0.000187592	1.22856	up
FBgn0262902	asRNA:CR43257	17	20	8	31	44	47	0.556977	0.790873	0.285164	1.15493	1.68455	1.60299	0.000648545	0.00188174	1.22999	up
FBgn0030215	CG15296	27	60	44	105	110	105	2.86083	6.22532	4.7944	11.4013	11.8908	11.2848	1.99191e-06	9.95138e-06	1.23004	up
FBgn0041103	nht	25	44	24	80	67	85	1.3113	2.14217	1.3258	4.5131	3.83744	4.62928	1.59958e-05	6.67872e-05	1.23043	up
FBgn0262812	CG43183	20	6	9	42	24	36	4.05307	1.28425	1.90553	8.04142	4.73718	6.67461	0.00195473	0.0050797	1.23138	up
FBgn0034011	CG8160	592	564	636	1438	1348	1365	25.4532	23.394	28.4889	68.1332	63.828	62.9674	7.03702e-30	3.39637e-28	1.23211	up
FBgn0032318	CG14072	4	17	25	39	44	45	0.65967	2.6064	2.54294	4.98026	6.78026	5.26994	0.00123086	0.00335373	1.23282	up
FBgn0036950	CG6996	45	58	53	127	146	104	1.42594	1.65499	1.65607	4.54816	5.06439	3.49535	8.20368e-08	5.46991e-07	1.23354	up
FBgn0259732	tal-3A	300	272	240	607	666	627	10.0091	8.50975	8.18146	20.8856	22.9724	21.3474	2.90817e-19	7.6961e-18	1.23482	up
FBgn0037035	CG10589	76	87	100	232	210	183	2.89495	3.15237	4.08262	9.62654	8.71505	7.35353	8.8198e-11	9.29132e-10	1.23567	up
FBgn0002735	E(spl)mgamma-HLH	48	41	41	113	114	91	2.44437	2.05412	2.24673	6.53149	6.73505	5.11459	2.6097e-07	1.58316e-06	1.23833	up
FBgn0052141	saturn	78	84	80	163	199	216	6.10751	6.21362	6.35617	12.2323	14.7885	15.8225	1.62457e-10	1.64957e-09	1.23922	up
FBgn0053223	CG33223	34	16	36	73	73	74	2.75156	1.08109	2.88485	5.6758	5.3626	5.99789	3.0492e-05	0.000120169	1.24107	up
FBgn0260447	CR11386	8	6	11	24	41	13	1.35666	1.05889	1.8113	4.01639	6.93208	2.19359	0.00343424	0.00834453	1.24147	up
FBgn0050052	Obp49a	92	109	87	232	225	228	6.44139	7.42379	6.27338	18.0425	17.8923	17.4164	1.44516e-12	1.9499e-11	1.24406	up
FBgn0036324	CG12520	76	85	83	198	179	206	3.71453	3.96433	4.13226	9.83447	8.8517	10.0058	1.88216e-11	2.19372e-10	1.24521	up
FBgn0031694	Cyp4ac2	153	142	110	321	322	321	5.42166	4.8914	3.60616	11.4837	11.684	10.746	1.47168e-13	2.23941e-12	1.2456	up
FBgn0038083	Ugt37A3	432	666	546	1304	1262	1289	13.3095	19.5779	17.6171	42.9207	41.8385	41.3799	3.42056e-20	9.60915e-19	1.24616	up
FBgn0034768	Obp58b	7	8	7	25	14	29	0.555701	0.598059	0.5921	2.09946	1.25744	2.36714	0.00288594	0.00715671	1.2486	up
FBgn0030578	CG5347	18	9	24	48	41	49	0.739414	0.366966	1.03884	2.13631	1.80206	2.11758	0.000301725	0.000953201	1.24988	up
FBgn0035542	DOR	1121	1034	1024	2480	2553	2434	16.3634	15.2591	15.8934	45.4963	45.3905	44.3919	9.42662e-35	5.80214e-33	1.25251	up
FBgn0265272	CG30060	17	8	11	19	37	50	1.77812	0.827099	1.15383	2.07438	4.15367	5.44273	0.00150453	0.00402334	1.25278	up
FBgn0030280	CG11106	105	107	127	258	278	273	19.5063	19.017	23.2681	46.489	50.7524	47.5108	5.04746e-14	8.12041e-13	1.25284	up
FBgn0031388	CG12674	52	73	62	181	162	115	2.1744	2.88601	2.65696	8.0207	7.21364	4.98871	4.95599e-08	3.44311e-07	1.25305	up
FBgn0038930	CG5778	20	11	19	39	39	58	2.0353	1.66949	1.68485	5.51569	5.77876	7.20838	0.000264566	0.000848531	1.25695	up
FBgn0262106	lncRNA:CR42859	385	396	396	963	883	931	14.7701	12.4041	15.9019	34.2206	36.0622	35.4782	8.40957e-29	3.97135e-27	1.25758	up
FBgn0052299	CG32299	56	91	61	191	171	147	5.09558	8.91653	7.8487	17.248	14.7675	15.7833	8.57135e-09	6.82469e-08	1.26065	up
FBgn0033296	Mal-A7	8	23	14	57	33	36	0.168559	0.434521	0.319181	1.1138	0.804727	0.649324	0.00061685	0.00180171	1.26281	up
FBgn0032202	REPTOR-BP	538	766	625	1512	1551	1517	65.4198	88.0562	80.02	190.098	198.662	176.999	7.97909e-25	3.01445e-23	1.26703	up
FBgn0029093	cathD	4017	4560	4579	10540	10182	10331	140.908	156.029	167.462	412.531	417.765	399.238	4.73913e-50	4.76347e-48	1.26723	up
FBgn0039235	CAH4	24	35	49	86	90	98	1.40019	1.8211	3.04872	5.45512	5.73454	5.97948	2.3292e-06	1.14949e-05	1.26857	up
FBgn0036563	CG13075	350	409	316	893	870	802	17.6182	19.7333	16.606	48.0307	47.7256	42.6562	8.64974e-23	2.82885e-21	1.26884	up
FBgn0013300	ProtA	98	66	74	204	202	180	11.9116	7.63438	8.61866	24.1769	24.2707	21.0912	5.623e-10	5.3477e-09	1.26979	up
FBgn0039108	CG10232	73	84	80	220	185	175	2.41648	2.6708	2.70243	7.04077	5.91403	5.75332	3.31373e-11	3.71979e-10	1.27488	up
FBgn0035089	Phk-3	1302	1875	1634	3710	3766	3999	179.377	249.542	236.564	544.238	559.767	553.094	1.00155e-26	4.26962e-25	1.27556	up
FBgn0039413	CG14556	25	20	12	56	49	49	1.25682	0.964183	0.604361	2.70667	2.36547	2.36423	9.18733e-05	0.000326594	1.27582	up
FBgn0035139	CG13891	32	44	71	132	116	124	2.23696	3.02048	5.15014	10.3825	9.3248	9.41293	6.09019e-07	3.41125e-06	1.27719	up
FBgn0032039	CG13385	29	6	23	54	43	70	1.04751	0.234352	0.869936	2.10061	1.70578	2.69226	0.000547288	0.0016175	1.27732	up
FBgn0051776	CG31776	22	33	29	61	73	83	0.621509	0.880322	0.869699	1.81445	2.14339	2.38866	5.68231e-06	2.61138e-05	1.27828	up
FBgn0036443	CG13471	44	55	52	101	167	113	2.79628	3.33834	3.48058	6.76693	11.4515	7.34612	2.11052e-07	1.30123e-06	1.27856	up
FBgn0037780	ohgt	1616	2034	1981	4453	4581	4387	118.29	145.677	154.221	396.429	412.259	379.519	2.50939e-37	1.6764e-35	1.27866	up
FBgn0034834	LS2	28	12	24	68	46	60	0.968145	0.408416	0.899756	2.62794	1.83523	2.2681	9.7716e-05	0.000345236	1.27892	up
FBgn0029986	CG15332	20	8	20	38	53	44	0.519247	0.197152	0.53841	1.02082	1.44139	1.16779	0.000280155	0.000892001	1.28259	up
FBgn0262790	CG43171	18	17	18	60	46	38	3.90455	3.60822	3.72372	11.5107	8.5452	7.2434	9.44973e-05	0.000334836	1.28274	up
FBgn0031337	CG14346	29	17	42	60	104	72	1.74628	1.04355	2.6386	4.12183	7.54309	4.48559	4.60879e-05	0.000174901	1.28295	up
FBgn0051697	CG31697	38	47	49	90	113	136	3.31366	3.84114	4.50355	8.40329	10.931	11.8967	1.66877e-07	1.0556e-06	1.28332	up
FBgn0035857	CG8006	41	52	41	94	123	121	1.074	1.29096	1.13458	2.64372	3.47895	3.30839	7.21708e-08	4.86886e-07	1.28435	up
FBgn0053527	SIFa	11	15	26	52	48	43	1.73599	2.33928	4.44865	8.97068	8.70342	7.20048	0.000146504	0.000496934	1.28661	up
FBgn0032626	CG12620	54	49	47	132	144	103	1.65629	1.44348	1.46886	4.17148	4.57098	3.23388	2.64155e-08	1.93068e-07	1.28923	up
FBgn0037486	CG14605	56	47	38	156	100	106	3.49266	2.83178	2.42666	9.7302	6.01336	6.55253	4.60787e-07	2.65425e-06	1.28972	up
FBgn0051226	CG31226	330	474	443	968	954	1098	151.124	203.591	200.242	414.067	420.719	442.862	3.34114e-21	9.90017e-20	1.29055	up
FBgn0010040	GstD4	70	69	88	189	152	227	7.42768	7.00162	9.92352	21.1602	17.505	24.7022	1.07197e-09	9.71425e-09	1.29232	up
FBgn0034863	SkpF	20	13	57	87	92	73	1.55635	0.998059	4.55425	7.31197	7.97967	5.83915	0.000206877	0.000678605	1.29287	up
FBgn0001291	Jra	444	482	467	1190	1084	1094	10.2991	10.7826	11.472	31.9884	29.7253	28.6812	3.16409e-32	1.7508e-30	1.29408	up
FBgn0001112	Gld	128	120	123	302	309	299	2.38692	1.67053	2.4536	5.57599	5.73119	5.90044	1.9542e-16	4.10944e-15	1.29427	up
FBgn0033788	CG13323	5335	6726	6695	15358	15066	14817	118.46	142.854	149.96	348.077	341.585	334.607	2.97531e-39	2.08958e-37	1.29639	up
FBgn0038680	Cyp12a5	146	160	116	347	347	344	3.71737	3.9004	3.19116	9.85427	9.88346	9.34219	1.21933e-15	2.34368e-14	1.29668	up
FBgn0030725	CG8958	13	13	13	29	39	43	0.374992	0.357285	0.385155	0.822425	1.0978	1.1762	0.000265416	0.00085051	1.297	up
FBgn0039452	CG14245	120	179	163	391	386	360	15.7076	23.0204	22.2401	56.7424	58.6986	50.613	6.11416e-16	1.21353e-14	1.30216	up
FBgn0033830	CG10814	346	396	424	951	1008	882	9.62401	10.6694	12.3253	31.1067	33.9339	28.3123	4.76374e-27	2.07109e-25	1.30219	up
FBgn0028379	fan	165	225	226	485	534	493	9.22518	12.0884	13.4917	29.4399	32.8339	28.9566	5.89414e-19	1.52302e-17	1.30427	up
FBgn0037503	CG14598	123	118	106	285	287	287	4.97834	4.5113	4.4845	12.4192	12.7818	12.2528	1.18158e-15	2.27512e-14	1.30435	up
FBgn0036196	CG11658	403	558	418	1114	1083	1177	6.90841	8.92859	7.2714	20.8285	20.3581	21.4639	2.67652e-23	9.02275e-22	1.30595	up
FBgn0034229	CG4847	1297	1359	1474	3380	3345	3312	39.5246	40.2694	48.7916	124.857	127.616	118.721	2.663e-45	2.24429e-43	1.30617	up
FBgn0034553	CG9993	166	181	171	393	441	443	3.80787	3.99909	4.21275	10.5532	12.1238	11.5473	3.83933e-20	1.0758e-18	1.30931	up
FBgn0002633	E(spl)m7-HLH	23	13	14	49	39	53	1.02494	0.582825	0.693163	2.50421	2.09829	2.58806	0.000108806	0.00038122	1.30957	up
FBgn0266432	CG45062	9	15	8	24	34	38	0.161186	0.247015	0.153715	0.468871	0.680141	0.710677	0.000599443	0.00175718	1.31106	up
FBgn0036471	CG13460	1838	1872	1883	4512	4700	4434	189.192	184.316	200.326	480.29	519.363	453.36	5.30804e-51	5.59181e-49	1.31224	up
FBgn0046689	Takl1	40	62	42	142	105	125	1.69916	4.27808	2.36849	7.86996	4.63845	5.73803	4.57331e-08	3.19549e-07	1.31693	up
FBgn0261502	CG42650	24	13	20	56	38	67	2.49474	1.32558	2.15589	5.57043	3.75458	6.49348	8.33767e-05	0.000298912	1.3178	up
FBgn0003943	Ubi-p63E	2424	2423	2020	5651	5082	6219	34.5193	34.9925	32.2375	92.5296	86.9211	97.5752	9.4512e-29	4.4251e-27	1.31864	up
FBgn0004174	Mst84Dc	130	193	217	442	475	431	90.9077	129.147	153.623	291.399	331.399	266.763	4.94061e-15	8.88824e-14	1.31905	up
FBgn0034684	CG13501	19	29	19	51	69	63	0.747174	1.05825	0.766288	2.05796	2.81568	2.52189	1.27376e-05	5.43644e-05	1.32509	up
FBgn0034470	Obp56d	3014	4279	3906	9192	9163	9331	340.042	468.271	470.045	1144.61	1182.86	1138.28	2.90569e-31	1.51594e-29	1.32828	up
FBgn0033271	CG8708	120	179	188	394	456	376	2.58373	3.84098	4.54003	10.3367	12.1798	9.46506	8.2982e-15	1.44769e-13	1.32913	up
FBgn0038102	CG14383	44	30	39	91	85	125	2.02823	1.32113	1.85683	4.35188	4.12951	5.85668	4.89126e-07	2.80275e-06	1.32989	up
FBgn0033289	CG2121	84	95	139	296	276	239	4.84356	3.61515	7.67336	14.5476	13.3777	9.5077	1.27752e-11	1.51806e-10	1.33059	up
FBgn0004170	sc	7	6	8	34	26	12	0.248513	0.220982	0.304838	1.24296	0.958304	0.442016	0.00183477	0.00479871	1.33087	up
Trans_newGene_39	-	4	5	13	25	33	17	0.866412	0.922424	2.31356	4.21056	5.57039	2.79602	0.00179318	0.0047079	1.33133	up
FBgn0263452	lncRNA:CR43475	8	9	9	36	24	22	1.95424	1.90496	2.00821	7.1206	5.14976	4.32711	0.000784004	0.00223337	1.33207	up
FBgn0039077	CG17380	25	29	12	56	64	64	2.86898	2.15005	0.970601	3.68687	3.06275	4.10083	2.493e-05	0.000100417	1.33214	up
FBgn0025573	PpN58A	32	20	20	53	83	64	1.51019	0.935703	1.0209	2.73185	4.29191	3.24963	1.51575e-05	6.3863e-05	1.33321	up
FBgn0036426	CG9592	13	20	12	39	42	48	1.4709	2.15759	1.38334	4.41534	4.73565	5.27628	9.13351e-05	0.000324998	1.3333	up
FBgn0032140	CG13117	304	554	594	1236	1268	1170	11.59	20.4659	23.2533	50.594	52.5891	47.2422	5.49667e-14	8.81721e-13	1.3364	up
FBgn0262487	CG43077	109	170	110	325	312	352	6.26819	9.23396	6.37744	18.4426	17.6072	19.5809	1.55268e-13	2.34961e-12	1.33693	up
FBgn0031248	CG11912	1302	1614	1517	3623	3766	3616	73.5254	87.5101	90.3162	227.588	244.207	219.384	9.59817e-43	7.56529e-41	1.33711	up
FBgn0040649	CG15461	22	27	17	60	54	68	14.0697	16.527	10.9842	35.7307	34.1772	37.2813	9.31476e-06	4.09685e-05	1.33784	up
FBgn0032897	CG9336	527	861	801	1710	1911	1884	44.283	69.9038	70.8857	159.123	182.607	169.133	7.23897e-20	1.98772e-18	1.34138	up
FBgn0260758	CG42556	84	95	51	203	200	196	3.89913	4.17713	2.47278	9.98227	9.95426	9.4254	4.77651e-10	4.62701e-09	1.3433	up
FBgn0262479	CG43069	25	19	50	82	93	85	8.14151	5.8399	16.0303	25.2018	29.2753	24.6925	7.52681e-06	3.37551e-05	1.34404	up
FBgn0260761	CG42559	43	48	28	98	105	114	9.21587	12.2507	2.20236	19.5223	20.3308	17.7581	9.92681e-08	6.52027e-07	1.34413	up
FBgn0038716	CG7342	51	58	69	145	169	149	1.37772	1.498	1.93591	4.25123	5.1602	4.28607	1.40394e-10	1.43218e-09	1.34752	up
FBgn0052672	Atg8a	3052	3572	3316	8448	8270	8144	143.842	160.258	162.804	421.153	418.054	391.846	1.92425e-54	2.19605e-52	1.3499	up
FBgn0037463	djl	92	69	56	176	195	198	3.90294	2.72808	2.5174	7.47634	8.37526	8.01066	2.42009e-10	2.40822e-09	1.35035	up
FBgn0030544	CG13403	382	457	505	1179	1114	1093	50.6641	57.3837	68.9916	169.544	163.072	151.084	8.53066e-29	4.01124e-27	1.3504	up
FBgn0033132	Tsp42Ej	637	865	844	1924	2008	1970	36.9907	48.4667	49.9869	125.334	134.788	125.297	1.15009e-30	5.80662e-29	1.35117	up
FBgn0031080	CG12655	38	89	76	214	160	165	3.72653	8.40893	7.60751	22.5287	17.3331	16.843	3.92591e-08	2.77821e-07	1.3542	up
FBgn0041709	yellow-g	13	11	12	34	38	36	0.545248	0.430227	0.513701	1.58512	1.79304	1.63664	0.000139661	0.000476675	1.35778	up
FBgn0033065	Cyp6w1	602	706	673	1725	1532	1758	15.7182	17.7314	17.8709	49.8307	44.1725	48.9378	1.24131e-35	7.77134e-34	1.36073	up
FBgn0085200	CG34171	14	17	9	34	53	34	0.937155	1.07808	0.638242	2.13052	3.30697	2.13537	0.000162093	0.000543752	1.36118	up
FBgn0259229	CG42329	52	56	44	132	145	126	1.28404	1.32663	1.13201	3.57294	3.95864	3.3454	5.34954e-10	5.11874e-09	1.36498	up
FBgn0033980	Cyp6a20	100	112	105	259	267	294	3.28701	3.46627	3.52687	8.67998	8.91226	9.75843	1.9518e-16	4.10944e-15	1.36606	up
FBgn0052087	CG32087	34	69	44	152	139	108	1.31708	2.54613	1.75024	6.44368	5.95316	4.45531	6.34371e-08	4.32493e-07	1.37429	up
FBgn0053983	obst-H	102	118	76	260	257	262	5.51288	6.12439	4.22474	14.9892	15.1375	14.8499	9.17977e-14	1.44088e-12	1.37885	up
FBgn0038449	CG17562	60	59	33	131	174	113	1.59298	1.50833	0.942332	3.98262	5.34822	3.3121	7.88275e-08	5.27571e-07	1.38024	up
FBgn0031596	CG15429	4	13	18	31	49	33	0.247316	0.655609	0.976302	1.76532	2.76655	1.78583	0.000374953	0.00115661	1.38436	up
FBgn0032111	CG13110	70	52	64	165	189	146	11.6944	8.44274	10.8362	26.9018	31.0141	22.9971	1.01831e-10	1.06153e-09	1.38535	up
FBgn0031407	CG4270	18	37	17	69	57	82	1.8331	3.56747	1.73004	7.21164	5.95188	8.21211	1.00047e-05	4.37398e-05	1.38634	up
FBgn0030597	Eo	24	20	31	58	75	80	0.58704	0.472152	0.789814	1.51652	1.98438	2.05727	1.94666e-06	9.74635e-06	1.38704	up
FBgn0027601	pdgy	1515	1449	1429	3848	3615	3872	23.9247	22.1477	23.8932	71.3295	69.0238	70.3553	4.12084e-47	3.73123e-45	1.38883	up
FBgn0085199	CG34170	13	9	7	30	24	41	11.9339	8.08968	6.32857	24.4281	20.9368	29.8113	0.000354459	0.00110075	1.38953	up
FBgn0052718	CG32718	39	48	49	122	116	130	3.79402	4.48062	4.79229	10.9881	10.4166	11.5475	7.58375e-10	7.05927e-09	1.38997	up
FBgn0035968	Slc45-1	997	1073	979	2567	2747	2575	21.76	22.2252	22.2259	60.7779	66.2889	60.2529	4.1846e-48	3.8853e-46	1.3944	up
FBgn0052091	CG32091	81	100	83	244	223	233	1.58632	1.63394	1.6811	4.93309	4.66016	4.84806	4.41683e-15	8.02501e-14	1.39485	up
FBgn0034659	CG4021	107	135	133	327	342	320	4.30535	5.28222	5.66491	14.6818	15.52	14.0712	7.24982e-19	1.86453e-17	1.39892	up
FBgn0031219	CG13694	29	56	41	113	108	127	1.71997	3.1302	2.47695	6.67796	6.36259	7.43036	1.89912e-08	1.42708e-07	1.40107	up
FBgn0262575	CG43115	11	20	14	36	54	47	1.68054	3.0269	2.24017	5.39168	8.14467	7.0119	4.15235e-05	0.000158956	1.4051	up
FBgn0036005	pall	214	230	220	556	598	591	9.64164	9.94475	10.0581	26.4522	29.0153	28.1432	5.5727e-28	2.50224e-26	1.40552	up
FBgn0267458	lncRNA:CR45808	7	12	14	40	32	33	1.48779	2.40272	2.9967	8.00391	6.54521	6.44305	0.000141098	0.000480531	1.40719	up
FBgn0265512	mlt	302	330	258	768	814	774	4.02267	4.34262	3.61932	12.0753	13.5828	12.234	1.24215e-27	5.48748e-26	1.41469	up
FBgn0031729	CG12511	2	16	7	35	24	31	0.316556	1.55967	0.954032	3.75761	3.43879	3.54429	0.000762982	0.00217915	1.41659	up
FBgn0265648	lncRNA:CR44455	94	98	74	236	228	258	28.2851	27.7468	22.4208	66.2529	65.6865	69.1758	8.62387e-15	1.50212e-13	1.42202	up
FBgn0030928	CG15044	380	470	512	1107	1260	1253	22.6427	26.7306	32.4657	75.3949	88.9296	82.4789	1.37167e-29	6.59124e-28	1.42471	up
FBgn0061435	CG30270	34	35	36	101	113	83	4.404	4.45302	4.79888	13.4387	15.2355	10.7802	1.62649e-08	1.23663e-07	1.42481	up
FBgn0032971	ttm3	23	24	29	58	92	73	1.47235	1.48128	1.89771	3.72469	5.8216	4.55327	7.92595e-07	4.32885e-06	1.43207	up
FBgn0260000	CG17570	71	87	53	167	214	205	3.65048	4.34052	2.79515	9.0969	11.8343	11.0924	1.65058e-11	1.94188e-10	1.4343	up
FBgn0052240	CG32240	50	26	51	127	119	119	5.86699	2.89784	6.55694	15.2987	15.7162	13.8553	1.95128e-08	1.46126e-07	1.43807	up
FBgn0040694	CG14974	12	23	8	47	34	58	2.74606	5.0338	1.95551	10.1636	7.82076	11.8561	7.9299e-05	0.000286166	1.43809	up
FBgn0267671	lncRNA:CR46007	9	6	9	29	27	27	0.596151	0.400739	0.608547	1.85448	1.70211	1.65949	0.000263399	0.000845533	1.43847	up
FBgn0029745	Rpn13R	23	31	19	63	80	72	1.24385	1.62782	1.06694	3.556	4.56097	3.95416	6.47179e-07	3.60106e-06	1.43898	up
FBgn0051104	CG31104	8	4	11	25	28	29	0.358719	0.163834	0.472468	1.0812	1.20271	1.23521	0.000351447	0.00109388	1.44449	up
FBgn0250826	CG34160	39	48	38	108	121	125	7.66331	8.97685	7.61828	20.9073	24.3619	22.8562	5.20321e-10	4.9918e-09	1.44543	up
FBgn0017558	Pdk	1621	1399	1249	3713	3987	3864	26.9523	22.3874	21.4235	66.3379	72.2607	68.8479	8.94103e-33	5.02349e-31	1.4471	up
FBgn0050072	Obp50c	16	15	19	47	58	49	0.564508	1.04839	1.23958	2.92934	1.98781	3.75653	5.86354e-06	2.69241e-05	1.45174	up
FBgn0033589	CG13227	102	193	175	445	424	429	16.9388	31.0594	30.2874	76.8142	74.9223	69.6086	3.13284e-15	5.78809e-14	1.45314	up
FBgn0038366	CG4576	214	221	199	557	609	567	5.01576	4.98507	4.8488	14.3203	15.8043	14.4236	2.87995e-28	1.32575e-26	1.45882	up
FBgn0265146	CG44215	241	269	212	665	646	662	74.1426	80.7991	65.4755	199.541	198.591	196.196	4.65805e-28	2.1264e-26	1.45886	up
FBgn0033312	CG8642	3	5	15	22	33	32	0.0724191	0.10336	0.334535	0.519565	0.797196	0.733	0.000535227	0.0015873	1.45946	up
FBgn0052061	CG32061	22	12	24	62	65	53	2.33471	1.24351	2.53844	6.27104	6.56301	5.20196	3.68766e-06	1.75432e-05	1.46456	up
FBgn0266430	CG45060	20	30	12	71	67	55	3.80399	5.28596	2.25904	12.88	12.4321	9.80849	3.76209e-06	1.7874e-05	1.47119	up
FBgn0033090	CG15909	7	8	18	29	50	36	0.212599	0.226189	0.553872	0.918153	1.57414	1.08415	0.000110259	0.000385942	1.48147	up
FBgn0051778	CG31778	692	795	820	2231	2028	2103	38.2994	42.422	45.5226	125.949	118.964	114.71	1.43166e-46	1.26494e-44	1.48454	up
FBgn0266488	CG45087	10351	8911	9408	26699	26729	25989	150.302	125.475	146.319	466.232	478.578	442.203	8.84826e-49	8.4297e-47	1.48688	up
FBgn0051910	CG31910	29	41	36	98	105	109	1.77608	2.38165	2.32449	6.27728	6.73831	6.7226	1.39314e-09	1.247e-08	1.487	up
FBgn0033828	CG17048	8	6	6	24	27	24	0.760581	0.828052	0.790788	2.34331	2.77903	2.47201	0.000262922	0.000844249	1.48788	up
FBgn0032577	CG13244	22	40	24	82	99	79	3.18292	5.5709	3.64176	12.1764	14.8295	11.2986	9.82889e-08	6.4637e-07	1.488	up
FBgn0036101	NijA	194	276	253	586	759	682	10.5258	14.4517	14.2445	33.0972	42.1217	37.7479	1.09908e-22	3.53123e-21	1.48927	up
FBgn0266431	CG45061	16	35	15	71	72	64	4.03061	8.82753	4.09595	17.9624	18.8863	15.7717	2.03625e-06	1.0159e-05	1.49065	up
FBgn0265422	lncRNA:CR44334	14	9	17	34	53	47	3.09467	1.97129	3.48122	6.88136	10.9339	9.45484	2.13795e-05	8.73679e-05	1.49797	up
FBgn0038866	CG5810	49	73	66	192	186	166	2.25381	3.16925	3.18132	8.90543	8.66364	7.43565	2.3717e-13	3.50666e-12	1.49976	up
FBgn0034335	GstE1	68	73	90	210	241	214	4.62871	4.7119	6.41499	15.514	18.1453	15.4875	1.53325e-15	2.91131e-14	1.50194	up
FBgn0053221	CR33221	17	15	9	44	41	52	0.487236	0.412804	0.282761	1.37677	1.27954	1.59924	1.18665e-05	5.11043e-05	1.50965	up
FBgn0266591	CG45116	7	16	11	45	39	33	1.79222	3.95491	2.81814	11.7709	10.7117	8.27272	3.62184e-05	0.000140364	1.50997	up
FBgn0039495	CG5909	2	16	4	22	29	41	0.055627	0.362839	0.118689	0.600458	0.82259	1.0657	0.000480502	0.00144467	1.51782	up
FBgn0033519	CG11825	27	42	13	72	106	86	3.04644	4.35238	1.63055	8.62064	12.758	9.95052	1.32357e-06	6.8498e-06	1.51997	up
FBgn0040153	l(1)G0469	149	120	150	407	430	377	2.14219	1.67516	2.14341	5.83577	6.46056	5.66773	7.52129e-22	2.3147e-20	1.5261	up
FBgn0263492	asRNA:CR43481	112	106	128	361	334	311	1.85	1.71988	2.21065	6.67601	6.24911	5.68149	7.20071e-21	2.08706e-19	1.53039	up
FBgn0030614	CG9072	18	34	12	70	62	77	2.38302	4.34631	1.67938	9.87063	9.09372	10.4814	1.76036e-06	8.90829e-06	1.53058	up
FBgn0040817	CG14132	339	410	365	1104	1027	1053	21.0249	24.3523	23.1679	72.5734	69.8062	68.5072	2.48689e-40	1.8535e-38	1.53131	up
FBgn0034552	CG17999	29	15	7	73	50	57	0.77651	0.382595	0.20095	2.11478	1.48058	1.6035	1.78276e-05	7.36775e-05	1.54108	up
FBgn0004240	DptA	30	29	23	94	62	106	5.23893	4.82961	4.14232	17.0751	11.7621	18.1671	7.27405e-08	4.90427e-07	1.54551	up
FBgn0015034	Cyp4e1	39	60	45	129	152	156	1.31963	1.95646	1.619	4.62259	5.43295	5.41621	7.20052e-12	8.92408e-11	1.54728	up
FBgn0032065	CG12438	16	6	13	57	37	34	1.82903	0.759051	1.57467	6.65673	4.33936	3.9378	3.28477e-05	0.000128712	1.55248	up
FBgn0029092	ced-6	1455	1484	1362	4170	4133	4125	22.5346	22.2551	22.027	73.8094	74.0256	71.6764	1.2539e-63	1.71722e-61	1.55254	up
FBgn0040942	CG12643	749	879	823	2403	2355	2396	48.0136	54.1888	52.5077	152.494	148.462	150.813	2.01233e-59	2.56362e-57	1.56779	up
FBgn0085195	CG34166	20243	26341	22956	63733	69054	71408	9321.64	11265.2	10386.5	24656.8	28711.5	24941.6	2.30914e-53	2.5299e-51	1.57586	up
FBgn0085315	CG34286	20	9	9	49	41	48	3.51739	1.0003	1.74179	7.91123	7.53397	6.20212	9.99821e-06	4.37287e-05	1.57959	up
FBgn0037151	CG7130	261	313	372	902	940	976	20.2289	23.6379	30.7002	78.9476	85.8082	82.5304	3.86427e-32	2.12749e-30	1.58261	up
FBgn0034721	CG11298	17	5	12	52	37	39	2.32459	0.741474	1.73912	7.72866	5.75036	5.62473	2.34823e-05	9.49696e-05	1.58326	up
FBgn0023197	Jon74E	18	17	11	51	48	60	1.18253	1.10308	0.740027	3.52197	3.3801	4.08043	1.32436e-06	6.85065e-06	1.58344	up
FBgn0032935	Atg18b	121	165	137	427	435	408	2.37513	3.10556	2.76257	8.99787	9.24716	8.50767	2.35324e-25	9.3076e-24	1.58441	up
FBgn0085194	CG34165	120	206	100	464	401	449	16.7358	27.6381	13.9404	72.423	65.0932	68.0846	1.16794e-14	2.00878e-13	1.58866	up
FBgn0052107	CG32107	45	49	72	167	167	183	1.04196	1.10107	1.69688	3.51523	3.56421	3.91375	2.43657e-13	3.59288e-12	1.589	up
FBgn0040653	IM4	22	35	24	78	95	91	5.88797	6.6495	7.10662	22.0705	26.3361	24.5059	4.93569e-09	4.08813e-08	1.59354	up
FBgn0037012	Rcd2	208	236	231	722	618	689	4.89011	5.27742	5.68833	17.5139	14.8909	16.4886	8.78198e-34	5.22909e-32	1.59528	up
FBgn0031622	CG3251	9	4	11	22	50	28	0.295153	0.118508	0.348335	0.736527	1.69687	0.922195	9.5902e-05	0.000339484	1.59726	up
FBgn0031471	CG3117	195	247	250	663	655	772	8.39436	10.2819	11.5425	31.563	31.4327	34.953	1.55204e-30	7.76445e-29	1.59961	up
FBgn0032549	CG4650	9	6	19	40	37	52	0.794414	0.529258	1.58401	3.14218	2.85659	4.01708	1.8667e-05	7.69145e-05	1.60081	up
FBgn0032401	Plzf	29	44	36	117	110	123	0.62969	0.866929	0.792456	2.73207	2.40757	2.66928	2.49833e-11	2.85122e-10	1.60897	up
FBgn0037175	CG14455	7	19	7	32	43	52	0.611691	1.55371	0.654805	3.09551	4.30327	4.70741	2.17271e-05	8.86231e-05	1.6099	up
FBgn0033137	Tsp42Ep	302	531	427	1279	1312	1266	17.5146	29.2394	25.3691	82.4199	86.4213	80.1635	1.15322e-25	4.66224e-24	1.61478	up
FBgn0263314	CG43400	8	23	25	71	73	54	1.37852	3.59357	4.07827	10.8968	11.2567	7.66661	9.12473e-07	4.91981e-06	1.61765	up
FBgn0000551	Edg78E	23	40	35	109	84	131	1.9731	3.82601	4.56298	12.0518	11.2769	17.0681	1.91106e-09	1.68579e-08	1.618	up
FBgn0267228	lncRNA:CR45668	56	62	52	187	171	181	1.9783	2.07627	1.84113	6.60013	6.05926	6.42129	5.27445e-16	1.0545e-14	1.62579	up
FBgn0041194	Prat2	253	268	242	818	791	739	6.04709	6.14777	5.99756	21.4346	20.9024	19.0617	2.08404e-39	1.47308e-37	1.6308	up
FBgn0031535	CG12795	229	219	251	701	757	697	8.20264	7.55539	9.5701	29.0693	32.407	28.1104	5.63757e-37	3.7208e-35	1.63094	up
FBgn0032008	CG14277	146	181	144	495	485	479	12.6451	15.1239	13.3706	47.6031	48.0174	44.3674	1.42119e-29	6.79935e-28	1.63156	up
FBgn0001234	lncRNA:Hsromega	2061	2636	2430	7303	7264	7196	101.771	123.834	120.704	351.153	346.383	346.289	1.88671e-62	2.52083e-60	1.63322	up
FBgn0260007	CG42493	8	16	9	45	44	36	1.65034	3.06302	1.91288	8.71959	8.52571	6.67883	5.9147e-06	2.71249e-05	1.63361	up
FBgn0036469	CG18649	1666	2333	1940	5918	6210	6093	234.87	303.541	279.573	802.814	906.152	768.43	1.60795e-47	1.46805e-45	1.63529	up
FBgn0011283	Obp28a	190	319	257	723	883	790	18.2417	29.7244	26.1299	76.8956	99.7875	80.6467	1.67858e-24	6.21302e-23	1.64016	up
FBgn0040905	CG15578	7	6	15	36	38	38	2.62256	2.29188	5.34986	11.6595	12.7712	11.9018	1.30363e-05	5.55527e-05	1.65014	up
FBgn0262486	CG43076	17	24	23	77	63	82	2.21827	3.08184	2.96594	9.6764	8.01509	10.3246	1.29055e-08	9.95726e-08	1.6509	up
FBgn0029820	CG16721	284	276	266	858	881	859	4.08986	3.81856	3.99056	13.865	14.6343	13.6026	2.33136e-44	1.92048e-42	1.66316	up
FBgn0000279	CecC	7	26	17	46	74	69	3.3634	11.3085	7.88123	20.1706	33.6498	28.0421	1.53145e-06	7.84047e-06	1.66738	up
FBgn0037069	Cpr78Cc	552	585	528	1678	1776	1775	85.1569	87.9109	85.2315	269.2	294.588	272.681	1.18946e-58	1.4979e-56	1.66819	up
FBgn0037416	Osi9	13	12	13	49	52	42	0.371313	0.327114	0.397951	1.63056	1.75732	1.34037	7.28906e-07	4.00354e-06	1.67086	up
FBgn0039684	Obp99d	12	23	8	59	53	52	2.11053	3.95422	1.56849	10.8914	10.0331	8.95216	9.50067e-07	5.09493e-06	1.68103	up
FBgn0040503	CG7763	213	338	305	954	888	900	16.0338	24.722	22.6975	70.8346	68.3163	64.6018	2.29019e-30	1.13536e-28	1.68141	up
FBgn0028939	NimC2	57	80	53	209	247	178	1.04174	1.40044	1.00508	4.23779	5.10332	3.5727	2.69495e-15	5.01289e-14	1.68696	up
FBgn0003231	ref(2)P	2230	1852	2030	6523	6530	6515	37.0112	29.7281	35.2863	121.477	124.079	119.51	4.37093e-55	5.14923e-53	1.69055	up
FBgn0015801	Reg-5	302	250	231	888	799	861	6.8039	5.45148	5.41646	23.0578	21.6014	22.0852	3.22176e-33	1.81946e-31	1.69799	up
FBgn0000422	Ddc	100	153	132	451	373	438	1.84637	2.62452	2.56203	9.62825	8.30085	9.21319	8.13926e-24	2.85813e-22	1.69912	up
FBgn0031470	CG18557	163	127	136	467	496	436	7.74092	5.80265	6.72121	24.4989	26.3261	22.1601	3.46535e-27	1.51865e-25	1.70159	up
FBgn0265300	lncRNA:CR44273	38	31	19	108	105	99	1.82825	1.46591	0.964882	5.5774	5.55967	5.06469	2.62264e-10	2.59563e-09	1.70213	up
FBgn0038100	Paip2	346	331	243	1058	1013	957	8.92219	8.04963	7.97305	29.2771	30.6246	25.027	1.02949e-31	5.52897e-30	1.71237	up
FBgn0033153	Gadd45	263	316	304	936	1037	905	5.70809	6.58115	6.86698	23.5298	26.5769	22.4379	2.48263e-44	2.02983e-42	1.7146	up
FBgn0050489	Cyp12d1-p	129	161	182	528	521	508	3.65979	4.38089	5.46805	16.1711	15.9652	15.2292	3.48168e-31	1.79931e-29	1.71925	up
FBgn0028569	robl37BC	22	20	19	86	68	72	1.83338	1.66162	1.7248	8.07717	6.62277	6.23118	2.06197e-09	1.80295e-08	1.73409	up
FBgn0262808	CG43179	554	712	653	2012	2125	2173	65.0236	83.6452	77.7487	239.56	255.229	257.302	4.19958e-57	5.16973e-55	1.73426	up
FBgn0267792	rgr	214	206	198	701	671	700	2.34154	2.18628	2.25045	11.7566	10.4664	9.66083	3.28875e-42	2.55543e-40	1.74937	up
FBgn0037934	CG6830	125	134	152	498	466	431	2.11743	2.15608	2.71766	9.04199	8.4859	7.63413	1.10721e-31	5.91738e-30	1.75666	up
FBgn0283461	Drs	695	1052	819	2744	2865	3076	266.106	391.753	329.652	1069.74	1180.48	1119.51	2.21213e-41	1.68306e-39	1.76714	up
FBgn0264903	CG44094	0	8	6	28	36	17	0	19.2835	14.9696	61.6771	86.2416	34.0459	7.45328e-05	0.00027075	1.76826	up
FBgn0085202	CG34173	4	9	3	22	33	27	2.01014	3.71322	1.49644	8.27063	12.775	9.72597	2.60663e-05	0.000104456	1.77251	up
FBgn0041184	Socs36E	384	383	323	1217	1327	1200	3.48783	3.34248	3.04581	13.5774	15.3395	13.4012	1.88317e-48	1.76342e-46	1.78647	up
FBgn0025456	CREG	412	551	476	1599	1711	1611	25.589	33.8037	32.6914	113.543	121.438	108.92	3.14203e-53	3.40833e-51	1.7871	up
FBgn0030183	CG15309	251	204	193	762	845	658	4.9494	4.19315	4.08949	16.7765	18.5946	14.064	7.63876e-31	3.87455e-29	1.79028	up
FBgn0038180	Cht5	30	38	41	118	133	150	0.476147	0.569017	0.695328	2.13837	2.45715	2.63348	3.31569e-14	5.41381e-13	1.7958	up
FBgn0032104	aust	11	8	4	32	38	38	0.60577	0.438758	0.280829	2.03901	2.43842	2.32332	3.30177e-06	1.5845e-05	1.80158	up
FBgn0033733	CG8834	25	27	19	79	99	100	0.570156	0.584088	0.463722	2.02423	2.55859	2.4681	2.69805e-11	3.07274e-10	1.82853	up
FBgn0016076	vri	190	143	208	668	616	659	1.87624	1.38043	2.04612	7.33565	7.04522	7.25435	5.55468e-32	3.04286e-30	1.8295	up
FBgn0030105	CG15369	261	327	304	1006	1128	1018	63.1526	78.8614	75.6507	255.623	299.05	249.284	1.18343e-50	1.23483e-48	1.82993	up
FBgn0033792	CG13325	27	30	24	121	119	79	0.690896	0.904851	0.722012	3.87528	3.92072	2.58229	1.20833e-11	1.44367e-10	1.8412	up
FBgn0040393	CG14265	5601	8648	8022	26647	26985	25806	778.322	1193.19	1173.6	4098.81	4418.48	3778.24	4.45838e-46	3.87667e-44	1.84364	up
FBgn0031468	CG2975	11	13	15	44	59	68	0.323303	0.302062	0.410533	1.13191	1.53097	1.69389	2.01228e-08	1.50488e-07	1.86961	up
FBgn0270926	AsnS	1818	2072	2148	7159	7281	7304	45.3037	49.8191	57.4437	201.347	207.002	199.155	5.18471e-96	1.18341e-93	1.87039	up
FBgn0039299	CG11854	160	211	205	705	671	729	6.4207	8.17712	9.0209	32.8661	31.6743	32.7362	6.30127e-43	5.00266e-41	1.87083	up
FBgn0034356	Pepck2	1948	1771	1804	6490	6914	6756	28.152	24.3312	28.552	111.434	120.044	110.909	8.53583e-83	1.55864e-80	1.88293	up
FBgn0033880	CG6553	3	6	1	25	23	19	0.160381	0.288548	0.0571397	1.26554	1.18314	0.957462	2.32664e-05	9.42704e-05	1.88851	up
FBgn0261990	CG42808	334	488	465	1535	1587	1638	28.5007	39.0018	40.5727	136.079	144.238	139.369	6.72448e-48	6.19104e-46	1.89292	up
FBgn0010041	GstD5	194	305	239	918	925	904	12.5299	18.9602	16.8129	67.0606	68.9219	62.6245	1.65324e-39	1.18385e-37	1.89398	up
FBgn0004554	Edg91	195	197	234	703	808	844	24.9917	24.7821	30.7294	97.8702	114.609	114.829	1.21612e-43	9.8695e-42	1.90837	up
FBgn0032639	CG18563	204	219	236	834	833	825	10.2081	10.5528	12.5584	42.748	43.0244	41.6496	1.39509e-55	1.66137e-53	1.92467	up
FBgn0036116	CG7888	61	65	57	217	246	260	1.75039	1.97115	1.99645	7.2354	8.0669	7.91344	2.22665e-24	8.13173e-23	1.93796	up
FBgn0034471	Obp56e	166	221	224	743	830	780	25.4432	33.217	35.4029	119.167	137.681	121.128	1.53809e-45	1.31651e-43	1.94438	up
FBgn0035176	CG13905	99	113	112	449	449	369	6.07945	6.68474	7.3057	30.6498	31.0196	24.5214	8.94146e-34	5.29528e-32	1.94853	up
FBgn0050087	CG30087	1	8	0	23	29	21	0.106079	0.6835	0	2.06297	2.6857	1.82761	2.26286e-05	9.189e-05	1.95062	up
FBgn0039239	CG13641	645	852	857	3172	2959	2931	104.547	134.495	144.038	555.427	530.621	493.223	1.07535e-64	1.49133e-62	1.95676	up
FBgn0051148	Gba1a	7	16	9	46	64	47	0.187112	0.39962	0.266692	1.33759	1.85576	1.29198	2.84371e-08	2.06877e-07	1.96122	up
FBgn0037114	Cpr78E	552	668	560	2320	2286	2313	105.392	125.838	115.535	484.364	503.677	450.876	7.06201e-79	1.24793e-76	1.97332	up
FBgn0036587	CG4950	18	6	14	57	64	64	0.536722	0.191277	0.443629	1.6614	1.85273	1.84278	5.23271e-09	4.3191e-08	1.97856	up
FBgn0028855	CG15282	658	755	801	2787	2959	2988	278.905	314.567	337.642	1139.46	1280.34	1146.45	2.96353e-85	5.79793e-83	1.99575	up
FBgn0029816	CG12729	2	6	8	28	36	33	0.1676	0.454932	0.610777	2.12441	2.74089	2.41462	9.7282e-07	5.20421e-06	2.00426	up
FBgn0086708	stv	1331	998	1051	4649	4484	4557	13.0572	9.72508	10.5206	60.6408	60.0185	59.6795	2.08992e-54	2.36054e-52	2.01229	up
FBgn0037126	CG14567	43	35	44	203	186	145	3.30861	2.6519	3.49045	16.4968	15.7788	11.2761	4.81681e-19	1.26251e-17	2.03737	up
FBgn0039577	CG12516	17	8	14	74	53	69	1.20463	0.540393	1.01112	5.13853	3.63204	4.78201	7.47302e-10	6.96803e-09	2.038	up
FBgn0040992	CG10570	2590	3603	3554	13385	13849	13603	144.18	188.29	208.367	799.717	833.221	769.747	1.67504e-72	2.82335e-70	2.07801	up
FBgn0034160	CG5550	737	1066	1062	3938	4117	4141	45.7547	63.31	69.9434	256.799	273.341	262.674	2.95776e-62	3.90424e-60	2.09512	up
FBgn0032631	CG15140	9	17	22	78	75	88	0.356543	0.618253	0.869217	3.26059	3.04963	3.42003	8.0846e-12	9.95223e-11	2.09842	up
FBgn0262881	CG43236	12	16	9	43	85	72	5.38773	7.02481	4.21853	18.1126	36.9416	29.0375	9.64005e-10	8.79404e-09	2.10108	up
FBgn0263081	CG43349	408	515	481	1853	1947	2268	142.442	176.661	182.347	701.268	787.024	809.23	1.15268e-67	1.7066e-65	2.11648	up
FBgn0035193	CG9192	29	23	34	110	171	134	0.981654	0.752422	1.21197	4.21032	6.56377	4.90209	3.32749e-16	6.78882e-15	2.12461	up
FBgn0015522	olf186-M	130	161	143	736	610	600	3.45255	4.1325	3.78418	20.1483	16.9186	16.3863	4.96912e-47	4.46243e-45	2.15006	up
FBgn0038113	CG11668	14	19	7	87	53	82	0.496523	0.625449	0.255663	3.23206	2.0303	3.01666	1.43296e-10	1.46042e-09	2.15416	up
FBgn0031971	Sirup	632	861	896	3449	3503	3640	49.1178	63.3113	71.2133	284.02	301.41	283.221	4.48617e-71	7.22802e-69	2.15494	up
FBgn0260955	CG42587	43	74	72	291	273	314	75.3996	125.177	131.276	485.055	508.838	461.669	6.04851e-28	2.70479e-26	2.15998	up
FBgn0261567	CG42681	3	16	8	41	52	77	2.87948	12.28	6.57113	29.0839	38.3181	50.8562	1.25202e-08	9.69406e-08	2.1707	up
FBgn0039454	CG14247	73	113	140	540	519	460	4.07771	5.98061	7.66565	31.7317	31.1902	27.0155	6.98682e-32	3.77082e-30	2.1766	up
FBgn0030326	CG2444	926	1177	1071	4846	4710	4701	100.346	126.127	117.004	565.179	571.447	543.3	9.15142e-106	2.38721e-103	2.18307	up
FBgn0039428	CG14237	50	80	41	278	250	296	16.7796	25.9358	15.1009	102.547	98.3098	101.414	1.72115e-24	6.34913e-23	2.18984	up
FBgn0041183	Tep1	557	479	499	2312	2444	2247	6.79833	5.51618	6.27614	28.6031	30.0707	27.3995	3.15914e-83	5.86635e-81	2.193	up
FBgn0262005	CG42823	2	0	12	49	43	29	0.534077	0	2.73403	10.7931	9.78294	6.2441	5.79303e-07	3.2598e-06	2.19425	up
FBgn0028583	lcs	3875	4180	4848	18765	20109	19968	343.225	363.045	482.703	2035.31	2268.82	2012.63	3.01668e-107	8.2627e-105	2.20312	up
FBgn0038838	TotB	0	6	0	268	273	305	0	1.21148	0	48.714	50.901	52.9042	4.64778e-06	2.17333e-05	2.22101	up
FBgn0262722	lncRNA:CR43166	11	6	6	44	64	41	43.4702	25.7451	26.2651	166.17	277.738	127.376	2.28585e-09	1.98603e-08	2.22125	up
FBgn0039593	Sid	166	135	145	762	684	668	6.74319	5.66709	7.29444	26.7932	23.6477	23.6838	1.87215e-52	1.99139e-50	2.22637	up
FBgn0050091	CG30091	171	210	217	909	1008	905	4.79394	5.59599	6.38382	27.8199	30.9863	26.941	5.98625e-66	8.40838e-64	2.23539	up
FBgn0002592	E(spl)m2-BFM	44	47	44	237	221	209	1.63328	1.66443	1.72048	10.1643	9.79157	8.74214	8.04483e-29	3.81555e-27	2.23648	up
FBgn0002732	E(spl)malpha-BFM	54	81	96	411	325	407	3.66144	5.27454	7.21748	32.3907	26.6389	30.0087	6.00125e-31	3.05813e-29	2.24973	up
FBgn0034140	Lst	624	699	637	3178	3125	2968	25.086	26.7867	26.9524	144.174	144.832	130.871	1.11288e-118	3.29532e-116	2.25613	up
FBgn0264987	lncRNA:CR44138	140	195	131	710	791	774	27.3619	36.2665	26.4319	138.475	157.088	144.121	4.9133e-50	4.89364e-48	2.26773	up
FBgn0053867	His-Psi:CR33867	1	8	6	43	23	58	0.177062	1.15154	0.907248	6.36607	3.47983	8.24578	6.13914e-08	4.19591e-07	2.27612	up
FBgn0005660	Ets21C	33	22	22	162	128	130	0.355964	0.247017	0.343099	2.28124	1.93643	1.84607	5.39867e-19	1.40828e-17	2.29013	up
FBgn0052282	Drsl4	9	0	5	49	26	54	5.35213	0.000745198	2.85105	26.2887	14.6663	26.7014	4.1199e-08	2.90274e-07	2.33459	up
FBgn0034317	CG14499	6	16	8	46	83	74	0.390193	1.01295	0.5776	3.33901	6.01731	5.19833	3.88397e-11	4.30696e-10	2.34276	up
FBgn0028396	TotA	6659	9278	7697	39185	39198	41348	1057.23	1395.67	1269.09	6204.31	6366.28	6264.07	2.88378e-100	7.18061e-98	2.35045	up
FBgn0063127	lncRNA:CR33938	86	106	129	601	541	530	15.1894	18.0832	23.4192	107.132	98.672	90.8201	1.59076e-48	1.50244e-46	2.35196	up
FBgn0033724	CG8501	1259	1280	1338	6419	6538	6689	61.6191	62.9532	72.4337	222.527	232.994	224.703	1.24585e-159	6.20433e-157	2.35821	up
FBgn0036419	CG13482	326	294	372	1789	1668	1643	46.0483	39.9992	53.2622	258.964	252.904	228.997	2.30196e-83	4.34833e-81	2.35958	up
FBgn0029831	CG5966	482	518	534	2671	2542	2635	8.18728	8.48993	9.3823	50.3989	48.7544	48.817	2.32658e-127	7.72425e-125	2.36743	up
FBgn0034856	yellow-d2	300	272	322	1514	1649	1525	9.73197	8.50214	10.7764	55.3089	62.0658	54.9012	8.17066e-91	1.65774e-88	2.38969	up
FBgn0035985	Cpr67B	1990	2491	2437	12112	12097	11958	81.3226	97.7127	106.406	568.124	587.215	536.744	8.30567e-137	3.03323e-134	2.40165	up
FBgn0032284	CG7294	274	325	322	1626	1650	1590	44.5271	51.8011	52.1335	278.025	286.15	271.48	7.85623e-106	2.09934e-103	2.40791	up
FBgn0032400	CG6770	4680	5474	4673	25543	26409	26381	226.854	249.905	244.57	1380.88	1458.28	1334.67	7.06457e-157	3.36519e-154	2.41787	up
FBgn0000565	Eip71CD	923	1145	1154	5664	5684	5747	44.0653	54.1756	57.0906	297.281	307.286	292.093	6.81402e-129	2.33295e-126	2.4206	up
FBgn0032281	CG17107	158	214	240	1136	1094	1080	39.9518	52.0295	57.4901	289.402	300.283	226.641	1.63634e-67	2.39037e-65	2.42331	up
FBgn0052865	lncRNA:alphagamma-element:CR32865	161	269	231	1196	1179	1278	5.00545	7.92211	7.19128	38.9214	39.2175	45.1933	7.90946e-61	1.01948e-58	2.44834	up
FBgn0041579	AttC	78	56	78	438	376	406	4.21202	2.90628	4.37878	25.5592	22.5301	23.0468	5.88113e-43	4.70318e-41	2.46814	up
FBgn0039473	CG17191	30	37	40	221	187	234	1.51194	1.73891	2.1364	11.9591	10.2959	12.1258	4.99631e-30	2.4221e-28	2.48257	up
FBgn0040734	CG15065	13	20	23	137	88	152	162.574	236.111	297.289	1451.22	1083.94	1316.32	7.7971e-18	1.86111e-16	2.50699	up
FBgn0015316	Try29F	51	49	57	329	310	306	2.1224	2.41055	2.22038	15.2715	15.218	15.1931	2.94644e-43	2.37362e-41	2.52849	up
FBgn0037007	CG5059	596	583	456	3110	3138	3262	16.3805	15.0963	13.3269	95.0036	94.969	93.7242	3.48576e-95	7.79387e-93	2.53336	up
FBgn0032139	CG13116	11	5	12	79	79	59	0.518448	0.248716	0.602987	4.14196	4.18263	3.04848	5.57946e-14	8.93692e-13	2.54667	up
FBgn0033593	Listericin	140	154	124	804	901	826	26.3805	28.5418	24.8969	162.776	186.971	159.612	8.08215e-78	1.40552e-75	2.58031	up
FBgn0034512	CG18067	1313	1746	1511	8969	9187	9172	90.2098	115.614	107.081	660.551	685.014	653.067	2.85846e-138	1.11847e-135	2.59003	up
FBgn0033598	Cpr47Eb	502	459	460	2944	2969	2832	25.1301	21.6788	24.9976	169.788	183.17	156.482	1.73067e-137	6.53837e-135	2.62498	up
FBgn0032587	CG5953	183	116	110	943	869	846	1.55924	1.08352	1.10277	9.11165	8.89375	8.08078	2.52691e-49	2.44999e-47	2.63432	up
FBgn0033594	CG13226	0	5	0	36	24	31	0	0.329612	0	2.47827	1.73117	2.06215	4.82994e-09	4.01189e-08	2.65302	up
FBgn0262531	CG43085	1838	2235	2141	12735	13064	12982	128.935	148.794	153.025	873.625	896.934	873.064	2.69587e-187	1.55453e-184	2.65696	up
FBgn0033355	CG13748	32	47	33	271	251	267	2.24493	3.18433	2.43477	21.4925	20.5663	20.5804	1.30167e-39	9.3823e-38	2.7187	up
FBgn0001229	Hsp67Bc	28	27	35	231	203	221	1.4887	1.40061	1.98278	13.4124	11.9547	12.4533	1.66362e-35	1.0356e-33	2.74052	up
FBgn0038009	CG17738	604	854	766	4903	5035	5218	207.679	282.433	268.428	1642.69	1755.14	1659.39	2.95464e-127	9.52089e-125	2.76929	up
FBgn0031178	CG10918	475	702	616	4286	4296	4126	41.5135	61.1701	57.2559	448.831	458.994	412.343	7.77078e-119	2.36491e-116	2.82096	up
FBgn0027544	CG2217	57	45	57	402	364	426	1.05492	0.670192	0.847972	8.92199	7.93227	8.88457	4.46841e-54	4.94504e-52	2.8325	up
FBgn0040104	lectin-24A	762	939	789	5817	5931	6075	46.9257	55.0334	51.0305	361.219	370.552	362.817	4.1882e-178	2.29429e-175	2.8472	up
FBgn0034511	GNBP-like3	1	9	18	253	264	250	0.189164	1.45097	3.02743	42.201	45.8766	40.0134	1.13129e-09	1.02096e-08	2.86055	up
FBgn0033207	CG12826	34	71	56	441	404	441	2.97083	5.92391	4.99773	41.1433	39.6523	39.6979	2.96661e-50	3.03758e-48	2.91094	up
FBgn0263080	CG43348	4	0	2	31	44	41	0.94308	0	0.497081	6.47489	9.21898	8.12894	8.27059e-12	1.0147e-10	2.94367	up
FBgn0266405	lncRNA:CR45045	7	1	2	56	46	52	25.2134	4.45381	8.77879	171.922	160.475	134.62	8.90825e-14	1.40228e-12	2.99453	up
FBgn0010388	Dro	14	12	12	146	136	136	1.72255	1.40517	1.48358	17.053	16.1488	15.7737	4.19026e-30	2.04038e-28	3.16748	up
FBgn0038943	CG5391	124	204	159	1671	1501	1561	7.26709	11.2719	9.83369	108.341	99.1687	92.5265	2.20569e-110	6.1963e-108	3.24597	up
FBgn0003046	Pcp	327	432	527	4037	4337	4137	25.2586	31.6558	42.3723	343.944	381.087	339.823	1.05382e-125	3.29875e-123	3.25609	up
FBgn0261924	lncRNA:CR42791	0	0	0	18	27	50	0	0	0	6.32761	10.0137	16.6632	3.16463e-12	4.11289e-11	3.29009	up
FBgn0036935	CG14186	14	23	26	243	250	238	0.15574	0.241504	0.29738	3.02064	3.16037	2.92101	1.53074e-46	1.34166e-44	3.34893	up
FBgn0001226	Hsp27	1097	1125	1092	10951	11377	11372	25.8675	25.0328	27.5335	292.442	305.699	294.131	0	0	3.3554	up
FBgn0286723	hll	245	253	253	2567	2532	2692	4.42736	4.42843	4.92712	53.8948	53.9832	55.0128	3.05346e-217	2.38955e-214	3.36961	up
FBgn0067905	IM14	0	0	0	28	23	44	0	0	0	170.969	161.525	218.56	4.9967e-13	7.14672e-12	3.3839	up
FBgn0038160	CG9759	11	9	14	160	156	137	0.445288	0.369833	0.605952	6.4803	6.30048	5.42228	3.07914e-33	1.74793e-31	3.40012	up
FBgn0040759	CG13177	39	41	25	392	412	406	4.78123	4.8179	3.04352	48.0961	51.1105	47.9426	1.11234e-66	1.5827e-64	3.40625	up
FBgn0262683	CG43153	158	239	204	2107	2135	2243	17.3126	25.202	22.846	242.178	248.7	246.15	1.72521e-151	7.56056e-149	3.40881	up
FBgn0260226	CG42500	165	218	235	2082	2358	2251	49.8705	63.7377	73.3765	621.46	729.408	637.939	1.00284e-154	4.57799e-152	3.4138	up
FBgn0050029	CR30029	23	23	12	193	245	320	2.70178	2.59553	1.49854	24.6916	32.0914	38.9657	2.05587e-38	1.40776e-36	3.43112	up
FBgn0037396	CG11459	12	15	12	201	177	161	0.392558	0.457407	0.423022	7.21695	6.38329	5.54543	3.16442e-38	2.15338e-36	3.4884	up
FBgn0263106	DnaJ-1	950	979	980	10940	11009	11171	17.6021	17.3258	19.0629	226.776	230.172	227.714	0	0	3.51785	up
FBgn0033592	CG13215	2	13	12	155	152	127	0.27565	1.46567	1.40167	17.7348	18.2391	14.4869	1.42491e-30	7.16113e-29	3.55434	up
FBgn0261560	Thor	737	780	801	9645	9587	9660	51.0176	53.5887	57.1203	732.287	748.215	705.984	0	0	3.64659	up
FBgn0052232	CG32232	0	0	0	46	28	54	0.00842936	0.000177964	0.000193252	0.931648	0.555383	1.06503	1.77916e-16	3.7703e-15	3.77241	up
FBgn0053225	CG33225	163	233	177	2904	2879	2899	9.64486	13.0486	10.913	179.666	180.071	175.952	4.85382e-214	3.54523e-211	3.89448	up
FBgn0032638	SPH93	120	177	185	2588	2590	2686	3.23357	4.4783	5.31962	74.9083	74.9919	74.7098	8.18564e-197	5.60512e-194	3.99034	up
FBgn0262838	CG43202	0	0	0	60	44	47	0	0	0	22.5726	17.3264	17.1595	1.64946e-19	4.42929e-18	4.0528	up
FBgn0038505	CG17283	129	156	126	2455	2656	2506	3.52622	4.07924	3.60635	72.5002	78.7093	72.3267	2.4195e-253	2.03908e-250	4.18015	up
FBgn0262607	CG43133	38	53	63	1072	1049	950	7.46467	10.2735	12.4443	208.037	206.164	180.359	4.25247e-142	1.72556e-139	4.22304	up
FBgn0033820	CG4716	152	210	194	3496	3551	3558	8.51246	10.9492	11.4972	213.038	221.506	212.321	7.86757e-282	7.8361e-279	4.22862	up
FBgn0036767	CG16775	0	0	2	106	75	52	0.00308886	0.0303074	0.190552	10.4659	7.54528	4.95869	1.50241e-23	5.17624e-22	4.25594	up
FBgn0266734	CG45207	11	30	25	512	511	516	2.63416	6.95101	5.79239	108.348	107.583	112.521	7.73189e-91	1.59831e-88	4.33907	up
FBgn0028514	CG4793	99	130	79	2319	2089	2209	1.84644	2.28403	1.52749	43.115	38.1761	40.1131	1.1166e-192	6.7964e-190	4.35778	up
FBgn0034329	IM1	83	116	63	1858	1977	2093	37.171	49.2364	28.4499	783.249	875.714	849.221	7.64952e-170	3.99086e-167	4.41256	up
FBgn0001224	Hsp23	959	1507	1261	28216	28726	28461	52.947	79.3234	74.6589	1770.35	1832.58	1689.62	1.16232e-271	1.0612e-268	4.48124	up
FBgn0031277	CG13947	442	558	593	13358	12998	12222	72.0209	91.6715	107.587	2541.64	2619.6	2191.02	0	0	4.57727	up
FBgn0040735	CG16836	9	11	9	305	328	340	3.96622	4.26715	3.95322	116.376	131.364	122.745	7.31339e-70	1.14465e-67	4.65881	up
FBgn0001230	Hsp68	395	413	372	13653	13378	12843	5.22213	5.2047	5.31	214.446	215.701	193.709	0	0	5.06279	up
FBgn0001223	Hsp22	177	272	203	8048	8190	8081	23.2979	43.2729	36.3673	474.895	491.872	452.401	0	0	5.1714	up
FBgn0261925	CG42792	0	0	0	110	118	126	0	0	0	26.6696	29.4487	29.6984	9.79224e-36	6.20138e-34	5.18593	up
FBgn0013275	Hsp70Aa	0	0	0	115	110	137	0	0	0	1.53589	1.50915	1.76499	5.88693e-36	3.77177e-34	5.20265	up
FBgn0036264	CG11529	6	15	9	569	610	550	0.202533	0.479856	0.333752	21.1016	23.0424	20.0759	7.1161e-104	1.81312e-101	5.42101	up
FBgn0053117	Victoria	0	0	1	167	171	192	0	0	0.216683	29.3214	31.0849	32.8837	1.78447e-45	1.51555e-43	5.57739	up
FBgn0025583	IM2	8	11	6	565	522	663	3.70372	4.50526	2.74688	238.11	232.184	261.187	2.26135e-99	5.50564e-97	5.60368	up
FBgn0036468	CG13461	1	0	2	256	250	252	0.152811	0	0.327173	33.6863	33.0408	31.4863	1.04044e-56	1.26656e-54	5.83247	up
FBgn0044809	TotZ	0	0	0	207	199	203	0	0	0	30.2386	29.1036	28.3085	1.42702e-49	1.40851e-47	5.88442	up
FBgn0001225	Hsp26	355	380	435	24174	24427	23141	16.8133	17.4877	21.4986	1329.51	1393.36	1210.29	0	0	5.91033	up
FBgn0013278	Hsp70Bb	0	5	2	3258	1491	3170	0	0.0598682	0.0302628	44.7843	21.0969	42.2037	1.36307e-44	1.13134e-42	6.12796	up
FBgn0015035	Cyp4e3	49	60	56	4211	4316	3977	1.44092	1.69213	1.77958	134.582	138.661	122.728	0	0	6.1386	up
FBgn0013276	Hsp70Ab	0	0	0	269	330	209	0	0	0	3.56736	4.53195	2.70002	4.75234e-55	5.53901e-53	6.16234	up
FBgn0040736	IM3	25	41	40	2878	2660	2963	19.1293	18.2994	32.7198	2130.8	2128.82	1990.31	1.05444e-297	1.15524e-294	6.16305	up
FBgn0053462	CG33462	0	4	0	426	437	492	0	0.193554	0	22.9177	23.5864	25.6869	8.81449e-78	1.50893e-75	6.48226	up
FBgn0034331	CG15067	2	5	1	572	589	566	0.383355	0.838145	0.203023	92.5311	100.185	89.2723	5.61784e-93	1.20684e-90	6.49908	up
FBgn0265668	CG44475	0	0	0	356	407	403	0	0	0	199.143	247.386	211.565	1.76592e-69	2.72499e-67	6.6935	up
FBgn0031276	CG12506	4	1	9	1086	1097	1205	0.827953	0.231395	1.82261	205.945	218.301	212.361	9.48082e-137	3.3507e-134	7.02264	up
FBgn0051354	Hsp70Bbb	0	0	0	527	619	597	0	0	0	7.28839	8.80681	7.98934	5.13454e-84	9.86912e-82	7.19174	up
FBgn0044812	TotC	44	71	47	9388	9359	9799	7.92179	12.425	8.90628	1703.94	1746.96	1700.85	0	0	7.32275	up
FBgn0013279	Hsp70Bc	0	0	1	799	777	805	0	0	0.0148363	10.8026	10.8169	10.521	4.07794e-99	9.7126e-97	7.49416	up
FBgn0013277	Hsp70Ba	1	2	0	1850	1924	2026	0.0141333	0.0302964	0	25.7193	27.5312	27.2631	9.33999e-149	3.93573e-146	8.44376	up
