# Supplementary material for: Combination of a nanocarrier delivery system with genetic manipulation further improves pesticide efficiency: a case study with chlorfenapyr
Source: Royal Society of Chemistry journal article supplement (doi:10.1039/d2en00126h), 2022-01-01
Supplement: d2en00126h7.xlsx [file d2en00126h7.xlsx]

## Sheet: Control-A1_Control-A2_Control-A
#ID	gene_name	Control-A1_Count	Control-A2_Count	Control-A3_Count	C-A1_Count	C-A2_Count	C-A3_Count	Control-A1_FPKM	Control-A2_FPKM	Control-A3_FPKM	C-A1_FPKM	C-A2_FPKM	C-A3_FPKM	pValue	FDR	log2FC	regulated
FBgn0038028	CG10035	215	210	180	0	0	0	11.908	12.2917	9.82614	0.0455576	0	0	2.56503e-75	2.02128e-73	-4.6438	down
FBgn0040984	CG4440	181	176	166	0	0	0	87.8433	82.4653	79.1903	0	0	0.398571	1.43479e-68	1.01897e-66	-4.47225	down
FBgn0034514	CG13427	129	142	166	0	0	0	33.4806	37.4904	42.5563	0	0	0	3.92539e-59	2.18172e-57	-4.22178	down
FBgn0026320	Tom	124	97	98	0	0	0	5.59331	4.68395	4.31382	0	0	0	2.63969e-46	1.12898e-44	-3.82048	down
FBgn0032507	CG9377	368	366	362	25	24	32	16.0884	17.0185	15.6843	1.0919	1.08831	1.35702	1.021e-98	1.08765e-96	-3.4529	down
FBgn0028853	CG15263	300	300	295	35	38	27	18.7973	19.5813	18.3003	2.12732	2.39239	1.63469	2.61211e-73	2.01693e-71	-2.92807	down
FBgn0000071	Ama	91	103	91	3	12	3	2.29783	2.85617	2.26755	0.0811371	0.315396	0.0923603	5.57554e-31	1.47464e-29	-2.87313	down
FBgn0033271	CG8708	937	918	970	178	122	162	21.5811	22.6745	21.6267	3.94735	2.74543	3.39233	9.89957e-159	1.67492e-156	-2.59095	down
FBgn0033855	link	42	51	38	0	0	3	1.23201	1.61928	1.10985	0.0226982	0.0236529	0.0803304	5.35131e-19	8.30862e-18	-2.51531	down
FBgn0040809	CG13465	39	29	30	0	0	0	4.71254	3.66409	3.67639	0.0938552	0	0	2.94889e-16	3.92219e-15	-2.35093	down
FBgn0035315	CG8960	57	42	40	3	2	3	4.51574	3.98462	3.21042	0.188043	0.146348	0.212998	2.93683e-17	4.13565e-16	-2.34069	down
FBgn0038398	sxe2	340	326	344	57	81	50	10.9801	11.2075	10.9988	1.83941	2.66639	1.57662	2.09651e-59	1.1766e-57	-2.31654	down
FBgn0000216	Brd	27	36	31	0	0	0	3.3607	4.69811	3.77185	0	0	0	1.12917e-15	1.44506e-14	-2.30567	down
FBgn0052232	CG32232	30	27	33	0	0	0	0.651534	0.58698	0.708603	7.97195e-08	0.000137345	9.8336e-05	4.06999e-15	5.05673e-14	-2.2612	down
FBgn0283480	Alp2	3404	3507	3334	752	758	810	79.8849	88.4816	77.2486	17.2321	17.7076	17.6643	0	0	-2.18246	down
FBgn0030859	CG12990	150	148	163	24	28	37	3.48416	3.69395	3.73969	0.562144	0.678005	0.816729	6.82705e-30	1.74934e-28	-2.12777	down
FBgn0039286	dan	52	54	73	9	9	7	0.497491	0.56987	0.690732	0.084963	0.0875511	0.0611035	1.4319e-15	1.82437e-14	-2.04375	down
FBgn0044049	Ilp4	22	20	30	0	0	0	1.2591	1.18062	1.62997	0	0	0	5.37531e-12	5.40585e-11	-1.98569	down
FBgn0265264	CG17097	3159	3334	3410	865	868	895	49.0307	53.7114	52.5295	13.0773	13.3833	12.9023	0	0	-1.95549	down
FBgn0032068	LManV	7214	7028	6834	1915	1965	1841	93.2765	97.5201	86.9888	23.5055	24.5278	21.2758	0	0	-1.92904	down
FBgn0043791	phu	82	67	91	21	19	6	1.6559	1.46747	1.82516	0.419927	0.40166	0.12916	3.53539e-15	4.40679e-14	-1.87776	down
FBgn0031617	CG15635	365	386	371	78	91	127	4.80105	5.4811	4.86487	1.0063	1.20018	1.52316	5.63426e-46	2.34015e-44	-1.86923	down
FBgn0039783	PH4alphaNE2	94	82	103	20	24	18	3.01669	2.76085	3.28738	0.634765	0.784198	0.533771	2.41955e-17	3.42623e-16	-1.83393	down
FBgn0085345	CG34316	127	172	161	47	33	34	10.8191	15.289	13.5703	3.94823	2.81075	2.88226	7.57699e-23	1.45531e-21	-1.82215	down
FBgn0000180	bib	82	96	89	22	20	18	0.918412	1.17268	0.981674	0.253018	0.236078	0.206658	7.70078e-17	1.05851e-15	-1.81488	down
FBgn0264329	CG43788	277	249	278	71	79	69	178.634	161.18	173.996	43.1819	49.4415	48.4706	5.18647e-38	1.75501e-36	-1.80897	down
FBgn0038986	sit	117	87	90	25	15	27	3.3555	2.66612	2.5541	0.701552	0.444645	0.718523	1.00787e-16	1.38043e-15	-1.80244	down
FBgn0250841	CG17242	933	844	903	276	268	256	64.0748	61.5856	62.2977	19.4106	18.856	18.3428	4.66106e-102	5.10719e-100	-1.7631	down
FBgn0002939	ninaD	325	373	344	97	105	100	10.0854	12.0779	10.5704	2.9032	3.18296	2.86334	7.47051e-45	3.01573e-43	-1.75187	down
FBgn0043825	CG18284	2478	2567	2547	775	763	796	36.9733	42.0517	36.6462	12.3096	12.2657	12.4965	7.64621e-252	2.19924e-249	-1.74405	down
FBgn0040107	lectin-21Ca	52	57	57	11	15	7	3.71631	4.09275	4.09141	0.775534	1.0758	0.499446	5.26547e-12	5.30466e-11	-1.73801	down
FBgn0019928	Ser8	545	644	580	174	194	162	37.7212	47.6387	39.6436	11.7617	13.3665	10.551	3.09748e-64	1.99086e-62	-1.73637	down
FBgn0032067	LManIV	441	487	517	150	167	113	8.15077	9.37954	9.48417	2.66696	3.0068	1.90456	3.07934e-49	1.38933e-47	-1.72698	down
FBgn0002629	E(spl)m4-BFM	17	24	18	0	0	1	1.11745	1.61252	1.15266	0	0	0.0899508	2.53524e-09	1.9708e-08	-1.71004	down
FBgn0003448	sna	13	21	22	0	0	0	0.314952	0.554274	0.527793	0	0	0	2.42652e-09	1.89526e-08	-1.70304	down
FBgn0023495	Lip3	513	534	497	180	149	144	16.5946	18.5394	15.8306	5.66088	4.80283	4.3611	1.08527e-58	6.00288e-57	-1.70193	down
FBgn0083938	BG642163	764	771	770	230	234	255	30.8229	32.9263	30.4346	9.08774	9.2876	9.53388	3.28818e-88	3.05084e-86	-1.69817	down
FBgn0003254	rib	80	78	98	20	20	24	0.691839	0.730099	0.83513	0.172152	0.178743	0.181761	1.27783e-14	1.53781e-13	-1.68618	down
FBgn0040296	Ocho	21	14	19	0	0	0	0.749183	0.538626	0.681272	0	0	0	3.92157e-09	2.9899e-08	-1.67874	down
FBgn0036778	Cyp312a1	782	761	782	235	261	258	21.5812	21.687	20.9062	6.05482	6.75761	6.12863	1.62977e-84	1.40981e-82	-1.64412	down
FBgn0034712	Alp8	70	60	68	21	9	17	1.53321	1.41488	1.4233	0.447044	0.195705	0.350818	7.03006e-12	6.98453e-11	-1.64075	down
FBgn0035476	CG12766	455	411	390	115	153	131	20.9909	20.1499	17.7802	5.16169	6.93049	5.69947	3.94206e-44	1.5374e-42	-1.6362	down
FBgn0003313	sala	104	75	74	15	19	31	7.12722	5.54872	4.38368	0.859908	1.48686	1.43898	1.04256e-12	1.10652e-11	-1.6179	down
FBgn0038702	CG3739	1911	1869	1876	596	638	661	63.5337	65.7326	61.7224	19.0595	20.6805	20.1288	4.9633e-173	9.3611e-171	-1.61752	down
FBgn0020377	Sr-CII	40	37	44	10	9	4	0.821339	0.872046	0.996136	0.217223	0.221826	0.0961487	1.92748e-09	1.52305e-08	-1.61446	down
FBgn0039768	CG15533	1038	1052	1025	347	367	325	17.405	19.0833	16.9258	5.61057	6.03153	5.01626	6.49392e-105	7.47125e-103	-1.61288	down
FBgn0032066	LManIII	4583	4355	4629	1455	1582	1550	72.7829	73.4917	72.7903	21.9622	24.3793	22.0342	1.07095e-296	3.85041e-294	-1.61155	down
FBgn0030830	CG5172	32	37	35	4	9	5	1.98678	2.42082	2.13324	0.242519	0.600614	0.320853	7.10672e-09	5.28525e-08	-1.59672	down
FBgn0051524	CG31524	69	46	60	12	15	15	2.54656	1.77919	2.21424	0.432987	0.563954	0.538324	1.03564e-10	9.215e-10	-1.58857	down
FBgn0250847	CG14034	330	263	307	105	99	96	21.6541	17.7147	19.9536	6.7322	6.49779	5.95139	7.53111e-32	2.07286e-30	-1.54967	down
FBgn0032335	CG14915	24	16	19	0	1	3	4.1597	2.8896	3.30987	0.133528	0.27223	0.635985	1.16975e-07	7.43126e-07	-1.52506	down
FBgn0003326	sca	61	75	87	27	16	19	0.57644	0.78998	0.801214	0.252637	0.154242	0.164464	3.13088e-11	2.95253e-10	-1.51962	down
FBgn0085314	CR34285	35	39	42	13	7	4	2.82163	3.10506	3.45954	1.09361	0.590294	0.348725	2.11e-08	1.48112e-07	-1.51751	down
FBgn0030223	CG2111	45	49	38	8	14	9	0.744248	0.869644	0.625076	0.144385	0.230089	0.139343	9.33428e-09	6.85328e-08	-1.49883	down
FBgn0002735	E(spl)mgamma-HLH	21	24	17	3	1	2	1.10323	1.34554	0.891655	0.165278	0.0853492	0.113162	2.13294e-07	1.31579e-06	-1.49513	down
FBgn0051089	CG31089	640	665	615	225	240	228	20.1542	22.1652	17.303	6.90643	7.19494	5.61536	1.95225e-61	1.14595e-59	-1.48841	down
FBgn0037038	CG11037	452	385	436	140	151	167	31.3147	27.6604	29.9324	9.40965	10.3253	11.0151	1.82638e-39	6.46539e-38	-1.47092	down
FBgn0263587	lncRNA:CR43612	35	51	48	12	10	11	2.39737	4.00681	3.62124	1.07141	0.831811	0.540963	1.59617e-08	1.13568e-07	-1.46593	down
FBgn0040637	CG11458	282	258	260	80	111	92	30.6689	29.3252	27.7251	8.56876	12.0449	10.1265	7.30704e-27	1.62921e-25	-1.46259	down
FBgn0004181	Ebp	14130	14341	13481	5039	5174	5562	835.256	890.527	802.096	295.165	306.416	308.386	0	0	-1.46148	down
FBgn0032615	CG6012	78	70	75	16	34	15	4.46735	4.20557	4.25297	0.908857	1.96867	0.817338	2.66469e-10	2.29128e-09	-1.45785	down
FBgn0031925	Cyp4d21	203	219	212	83	63	80	6.87757	7.67706	7.13824	2.75247	2.11218	2.52183	2.77338e-22	5.17984e-21	-1.43457	down
FBgn0038918	Qsox3	139	155	138	53	43	54	4.74441	5.48688	4.68723	1.78121	1.46532	1.71621	1.40161e-16	1.89713e-15	-1.42384	down
FBgn0036321	CG14120	4058	3909	4138	1551	1574	1555	44.7854	45.9501	45.2749	16.5807	17.1272	15.5925	1.96452e-251	5.51262e-249	-1.41991	down
FBgn0264349	lncRNA:CR43805	159	128	159	52	43	60	14.3859	12.3078	16.6321	4.63332	4.0938	5.72256	3.64241e-16	4.80572e-15	-1.41884	down
FBgn0051016	CG31016	153	172	189	66	60	57	3.78976	5.27784	4.05747	1.85868	1.68562	1.40436	2.19644e-18	3.27332e-17	-1.41247	down
FBgn0032069	LManVI	13852	14184	13416	5432	5435	5327	157.505	176.325	150.099	58.6308	59.7643	53.9726	0	0	-1.40841	down
FBgn0001148	gsb	16	19	22	3	1	2	0.425574	0.551227	0.588942	0.0841431	0.0435231	0.0563594	1.02745e-06	5.82883e-06	-1.40805	down
FBgn0052203	Spn75F	309	313	290	118	120	104	18.1614	18.6697	16.8658	6.7608	7.01323	5.74158	1.61424e-29	4.01987e-28	-1.39953	down
FBgn0262583	CG43123	108	96	98	43	30	29	5.57013	5.30573	4.99294	2.20107	1.59388	1.43288	2.59571e-12	2.67836e-11	-1.39392	down
FBgn0085243	CG34214	9	18	17	0	0	1	1.57146	3.1054	2.75742	0	0	0.248879	8.51879e-07	4.88578e-06	-1.38517	down
FBgn0051496	CG31496	96	95	110	39	38	26	6.1886	6.59062	7.06829	2.5364	2.52826	1.68918	4.67706e-12	4.74512e-11	-1.37776	down
FBgn0038071	Dtg	123	123	142	42	35	60	1.8467	1.95789	2.09641	0.600131	0.511898	0.809037	1.21481e-13	1.36889e-12	-1.37386	down
FBgn0035933	CG13309	2181	2189	1936	824	864	829	198.751	208.164	175.981	74.1745	78.9312	72.708	1.03848e-120	1.3577e-118	-1.36711	down
FBgn0032853	CG10651	39	42	59	9	15	15	1.90502	2.1779	2.71154	0.462626	0.756866	0.696026	1.05374e-07	6.74265e-07	-1.36461	down
FBgn0036325	CG10752	47	45	47	13	13	14	1.99873	1.98629	1.99972	0.576865	0.558912	0.581877	5.81785e-08	3.86904e-07	-1.36373	down
FBgn0033999	CG8093	2339	2257	2164	902	874	934	93.4066	94.7692	85.1188	35.2362	34.3646	34.6026	1.03915e-145	1.59405e-143	-1.36344	down
FBgn0035042	CG3640	772	777	768	306	304	309	35.7662	38.9002	34.9048	14.1095	14.3943	13.8594	1.7334e-65	1.15276e-63	-1.3634	down
FBgn0040349	CG3699	1412	1460	1372	547	550	603	83.3022	92.7694	79.6281	31.8837	32.7623	34.9235	6.13931e-101	6.66347e-99	-1.35934	down
FBgn0038566	CG14317	15	9	15	0	0	0	0.506987	0.338669	0.488198	0	0	0	1.11282e-06	6.27598e-06	-1.35018	down
FBgn0267024	asRNA:CR45468	32	27	30	4	8	8	1.77913	1.55335	1.67009	0.264545	0.454358	0.428461	1.20275e-06	6.747e-06	-1.35	down
FBgn0039378	alpha4GT2	33	39	45	9	16	5	1.39142	1.70612	1.90419	0.400629	0.685039	0.209361	5.02634e-07	2.97011e-06	-1.34961	down
FBgn0051300	CG31300	2259	2251	2348	1009	927	852	86.6769	88.932	89.1625	37.0584	34.4215	30.0597	1.77219e-125	2.39872e-123	-1.34199	down
FBgn0036528	CG7579	10	33	32	1	4	6	0.422373	1.40289	1.28955	0.0626831	0.193167	0.22433	3.28698e-06	1.72758e-05	-1.34028	down
FBgn0050486	CG30486	163	203	185	62	72	75	11.0478	13.9576	12.3611	4.12527	4.87274	4.84627	1.09417e-17	1.57552e-16	-1.33807	down
FBgn0263410	lncRNA:CR43456	46	37	46	11	12	14	5.46585	4.50115	5.4314	1.33399	1.46753	1.65224	2.12683e-07	1.31273e-06	-1.33264	down
FBgn0032122	CG31883	1497	1494	1358	581	558	645	66.5125	67.7639	59.8765	24.9539	24.0101	27.234	2.21317e-87	2.02084e-85	-1.32374	down
FBgn0262357	CG43055	642	707	701	256	283	300	111.537	124.011	120.87	42.96	48.0866	50.1654	2.20196e-50	1.01741e-48	-1.31326	down
FBgn0031065	CG14234	75	72	77	31	24	23	0.914691	0.939969	0.922532	0.378306	0.301397	0.266023	1.62436e-09	1.2951e-08	-1.30548	down
FBgn0038790	MtnC	433	440	419	181	183	163	551.759	565.348	540.471	217.174	227.876	244.434	5.95712e-36	1.87772e-34	-1.30443	down
FBgn0037498	CG10029	112	93	98	48	33	29	5.23957	4.48715	4.59297	2.19579	1.54553	1.28048	6.53853e-11	5.94671e-10	-1.30379	down
FBgn0002869	MtnB	67	106	108	34	40	25	36.4588	57.647	56.9771	17.129	20.6565	14.1313	1.07533e-09	8.73703e-09	-1.3018	down
FBgn0264709	lncRNA:CR43978	51	53	57	20	16	16	3.63157	3.99303	4.05585	1.43229	1.18001	1.13658	6.14003e-08	4.0575e-07	-1.30029	down
FBgn0265914	asRNA:CR44703	262	277	252	120	111	85	11.8511	13.3483	11.3315	5.419	5.05514	3.72906	5.47417e-22	1.0093e-20	-1.2997	down
FBgn0050395	CG30395	138	145	147	63	50	53	3.52544	3.82696	3.85386	1.61857	1.32317	1.08578	1.6634e-14	1.99348e-13	-1.29348	down
FBgn0260766	CG42564	404	428	406	179	159	172	8.88309	10.1352	8.77672	3.79708	3.41921	3.53318	6.03675e-34	1.7583e-32	-1.28888	down
FBgn0019661	lncRNA:roX1	2096	1971	2172	899	830	912	38.9178	37.098	40.3058	16.2131	15.2377	15.7532	1.10984e-114	1.3879e-112	-1.28414	down
FBgn0040097	lectin-30A	324	315	323	140	126	130	27.2336	26.2427	25.9506	10.907	10.0087	10.28	1.8564e-27	4.28013e-26	-1.27845	down
FBgn0262622	lncRNA:CR43146	43	66	45	19	18	12	2.60158	4.05232	2.67203	1.13011	1.06416	0.74065	3.1003e-07	1.8783e-06	-1.27391	down
FBgn0038719	CG16727	238	207	224	83	83	105	6.32272	5.8942	5.89307	2.14595	2.19178	2.60855	4.2032e-19	6.5793e-18	-1.27097	down
FBgn0034582	Cht9	188	173	211	83	83	63	7.69219	7.7403	8.51697	3.34968	3.44498	2.50581	1.47526e-16	1.99212e-15	-1.27023	down
FBgn0051419	CG31419	92	75	96	36	40	19	6.98353	5.94623	7.15462	2.67651	3.01533	1.37809	3.02859e-09	2.33538e-08	-1.2697	down
FBgn0025454	Cyp6g1	4814	4841	4753	2143	2037	2040	99.0439	108.874	95.3997	38.8059	37.186	37.4665	1.11244e-236	2.84413e-234	-1.26271	down
FBgn0267542	asRNA:CR45882	125	93	102	30	45	47	11.1732	8.7607	9.02814	2.72605	4.16238	4.23691	1.79099e-10	1.56338e-09	-1.25167	down
FBgn0266788	lncRNA:CR45253	21	24	17	1	8	1	3.22938	3.71535	2.62322	0.240942	1.24746	0.229823	1.48462e-05	7.04641e-05	-1.24829	down
FBgn0266365	lncRNA:CR45013	288	289	252	104	145	95	31.5117	33.0442	27.3121	11.592	16.4668	10.3927	1.97857e-19	3.13547e-18	-1.24422	down
FBgn0034415	CG15116	100	101	89	45	31	35	13.1177	13.602	11.5883	5.74999	4.05446	4.71947	3.02349e-10	2.58626e-09	-1.2437	down
FBgn0051418	CG31418	135	139	129	62	48	52	11.4952	12.352	10.9956	5.18485	4.07093	4.19477	6.77883e-13	7.26168e-12	-1.23484	down
FBgn0033296	Mal-A7	4829	4749	4725	2108	2024	2175	96.92	101.447	93.0742	40.6876	40.0767	39.6066	8.41876e-218	1.97669e-215	-1.23204	down
FBgn0052368	CG32368	490	530	557	259	211	214	133.608	143.251	149.609	66.9983	55.1504	59.4315	1.95143e-34	5.77152e-33	-1.22247	down
FBgn0040376	AANATL7	169	161	119	77	50	54	7.86519	8.05072	5.37968	3.57291	2.36819	2.44213	8.07052e-12	7.99753e-11	-1.21942	down
FBgn0036831	CG6839	107	111	102	37	40	50	3.40487	3.79433	3.2039	1.15024	1.26487	1.49795	9.55338e-11	8.54679e-10	-1.21914	down
FBgn0264552	CG43931	44	31	43	13	12	12	3.27528	2.41314	3.13744	0.926029	0.899328	0.903652	2.89598e-06	1.5354e-05	-1.2191	down
FBgn0037650	CG11977	46	50	56	23	16	13	3.65867	4.13769	4.39301	1.81016	1.27827	1.00637	6.82554e-07	3.97207e-06	-1.21621	down
FBgn0259975	Sfp87B	6601	6854	6175	2929	2936	2899	2535.64	2612.95	2329.94	1064.03	1088.39	1164.49	2.12466e-200	4.7008e-198	-1.21394	down
FBgn0037036	Sems	153	130	142	51	62	62	11.265	9.9207	10.3575	3.71105	4.61878	4.40346	6.76023e-13	7.2485e-12	-1.20968	down
FBgn0052382	sphinx2	89	105	91	41	38	34	4.03296	5.86546	5.49095	3.08187	1.98503	2.251	8.44206e-10	6.94749e-09	-1.20328	down
FBgn0021776	mira	217	239	240	98	96	105	2.02179	2.4605	2.17489	0.895277	0.913584	0.923858	6.55838e-19	1.01417e-17	-1.20065	down
FBgn0264350	asRNA:CR43806	42	20	32	8	10	8	13.6798	6.04374	7.73946	2.34307	2.72363	2.2978	1.42016e-05	6.76839e-05	-1.1996	down
FBgn0264085	lncRNA:CR43754	98	94	98	40	35	41	7.04669	6.89202	6.69678	2.81191	2.61956	2.8072	5.29179e-10	4.43747e-09	-1.19896	down
FBgn0267987	lncRNA:CR46254	16	27	22	4	4	6	1.22521	2.04954	1.66042	0.301476	0.310627	0.480332	2.86879e-05	0.000129028	-1.19867	down
FBgn0032338	CG16854	48	78	75	20	25	29	0.848249	1.4047	1.1921	0.301306	0.443068	0.489457	2.10826e-07	1.30196e-06	-1.19487	down
FBgn0002571	Mal-A3	3009	3008	3006	1381	1383	1315	63.2015	68.8628	62.0887	28.4393	29.0226	25.6696	1.11514e-159	1.91489e-157	-1.19472	down
FBgn0267543	lncRNA:CR45883	48	37	53	6	18	21	8.28207	6.56052	9.08318	1.11794	3.14621	3.56546	4.39136e-06	2.2666e-05	-1.19035	down
FBgn0039598	aqrs	245	267	284	111	95	139	9.75502	11.2945	11.2078	4.31959	3.7289	5.12536	2.0695e-18	3.09215e-17	-1.18802	down
FBgn0033167	CG1701	75	87	94	28	32	41	12.3333	16.0874	16.6936	5.72973	7.29145	6.56062	9.38386e-09	6.8809e-08	-1.18473	down
FBgn0050110	CG30110	35	30	29	14	4	9	1.19918	1.03236	0.975572	0.47652	0.163057	0.312714	1.81794e-05	8.49657e-05	-1.17958	down
FBgn0003430	slp1	48	49	49	20	12	20	1.27288	1.3887	1.2761	0.51479	0.318841	0.500322	1.76918e-06	9.72499e-06	-1.17141	down
FBgn0034437	CG10051	89	134	146	44	56	52	1.73751	2.77602	2.80988	0.830888	1.07934	0.938511	8.90315e-10	7.31648e-09	-1.16796	down
FBgn0051021	CG31021	78	97	102	31	35	46	2.60038	3.40049	3.33417	0.978802	1.13488	1.41424	7.97561e-09	5.91233e-08	-1.16543	down
FBgn0033165	CG11113	31	37	30	18	4	6	7.31935	8.66758	6.85482	4.1365	1.11151	1.59045	2.8531e-05	0.000128423	-1.16088	down
FBgn0038919	Qsox2	231	249	284	97	130	111	7.04731	7.94199	8.59048	2.8517	3.889	3.16328	1.69327e-17	2.41402e-16	-1.15965	down
FBgn0038236	Cyp313a1	1170	1170	1139	502	519	583	49.1359	49.8138	47.5363	20.2288	21.0807	22.5813	1.1781e-64	7.74519e-63	-1.15684	down
FBgn0030643	CG15641	92	113	82	47	42	28	21.7437	27.9575	19.0711	11.1724	10.1206	7.18262	1.31204e-08	9.40502e-08	-1.15336	down
FBgn0262895	lncRNA:CR43250	26	36	22	9	7	8	10.7559	15.0285	8.92651	3.78681	2.9265	3.62193	3.39331e-05	0.000150676	-1.15213	down
FBgn0083965	CG34129	181	194	201	75	90	89	10.2153	11.5926	11.1949	4.17455	5.02736	4.74291	3.77904e-15	4.70031e-14	-1.1515	down
FBgn0002570	Mal-A1	12690	12580	12586	5811	5996	5891	254.831	274.656	248.82	112.852	118.629	107.664	0	0	-1.15064	down
FBgn0051680	CG31680	156	152	164	53	64	88	28.4367	27.8671	29.7178	9.51325	11.5451	15.8781	6.99752e-12	6.96422e-11	-1.14296	down
FBgn0263337	lncRNA:CR43418	37	51	37	9	20	14	3.23917	4.68627	3.15534	0.8172	1.76206	1.23615	1.1294e-05	5.48026e-05	-1.13731	down
FBgn0002855	Acp26Aa	1210	1242	1250	559	549	625	189.752	176.298	175.506	89.3627	95.3448	102.787	7.51951e-67	5.21157e-65	-1.13632	down
FBgn0259958	Sfp24F	105	121	109	57	46	40	20.7415	22.244	20.6963	10.3379	8.04442	7.77183	8.01432e-10	6.6239e-09	-1.13439	down
FBgn0030895	CG7135	61	86	49	33	18	24	1.76172	2.67654	1.39914	0.925592	0.514955	0.649334	1.47883e-06	8.19948e-06	-1.13299	down
FBgn0051014	PH4alphaSG1	32	33	30	13	11	6	0.979872	1.03625	0.915401	0.398886	0.337261	0.187601	2.93866e-05	0.000131964	-1.13297	down
FBgn0054002	CG34002	193	181	227	89	86	95	10.7325	10.4339	12.2239	4.66681	4.54445	4.78169	1.1322e-14	1.3654e-13	-1.12716	down
FBgn0266891	lncRNA:CR45351	17	15	14	4	3	0	1.08673	0.99256	0.859832	0.29738	0.204631	0.0447757	8.63851e-05	0.000357247	-1.12629	down
FBgn0035009	CG16837	64	56	68	20	21	33	8.61568	7.77999	9.0926	2.63233	2.79569	4.36307	8.56273e-07	4.90608e-06	-1.12416	down
FBgn0283437	PPO1	548	584	520	269	240	267	10.3189	11.8763	9.66712	4.94532	4.49063	4.64247	3.08429e-33	8.84906e-32	-1.11594	down
FBgn0036494	Toll-6	54	52	75	14	39	14	0.340425	0.346991	0.467864	0.0892185	0.245579	0.083083	8.887e-06	4.40521e-05	-1.11031	down
FBgn0016123	Alp4	4030	3907	4012	1917	1922	1897	69.0848	72.3754	67.7249	31.8864	32.5603	29.9414	5.59733e-175	1.07329e-172	-1.11003	down
FBgn0266766	lncRNA:CR45231	27	21	28	12	7	1	0.354241	0.282714	0.356581	0.158999	0.0992822	0.0191116	0.000100319	0.000408412	-1.10788	down
FBgn0261059	Sfp78E	124	141	186	71	56	73	11.5081	13.1331	17.2146	6.43939	5.06636	6.49289	2.00281e-10	1.74431e-09	-1.1048	down
FBgn0051493	CG31493	54	51	51	22	20	19	3.39269	3.26123	3.17239	1.39816	1.31886	1.16659	2.94216e-06	1.55773e-05	-1.10451	down
FBgn0051343	CG31343	6627	6511	6653	3199	3174	3201	101.55	107.044	100.767	47.6115	48.0806	45.2188	4.59241e-242	1.22874e-239	-1.10048	down
FBgn0035695	CG10226	551	446	508	236	208	267	5.99402	5.19767	5.43942	2.51113	2.1389	2.66256	1.31946e-25	2.8008e-24	-1.09898	down
FBgn0264843	lncRNA:CR44051	58	58	56	19	26	24	21.1582	20.9812	20.2898	6.61188	9.03901	8.95645	1.78944e-06	9.8176e-06	-1.09763	down
FBgn0262899	CG43254	140	154	156	67	80	56	26.5187	29.093	29.0958	12.2027	14.5779	10.3535	2.16409e-11	2.06108e-10	-1.09747	down
FBgn0039782	CG15539	146	183	171	86	77	64	6.8524	8.54278	7.87438	3.33688	3.6886	2.70898	5.39016e-12	5.41605e-11	-1.09616	down
FBgn0036158	CG6149	149	131	135	71	59	57	15.7737	14.6466	14.234	7.33438	6.22273	5.75606	5.67857e-11	5.20159e-10	-1.09422	down
FBgn0040211	hgo	1104	1156	1124	494	550	586	45.7214	50.6381	46.1924	19.7236	22.2099	22.539	4.91331e-56	2.60496e-54	-1.09404	down
FBgn0036091	CG18628	7929	8211	8796	3992	3926	4217	4095.02	4392.8	4441.99	1920.2	1909.93	2194.4	2.53783e-157	4.1711e-155	-1.09006	down
FBgn0265187	Fatp2	204	214	198	100	100	86	3.99297	3.91832	2.90191	1.6892	1.74242	2.3578	7.8315e-15	9.55476e-14	-1.08964	down
FBgn0032253	LManI	568	634	554	262	331	248	9.88001	11.4559	9.53714	4.39433	5.61799	3.95355	1.62362e-27	3.75096e-26	-1.08409	down
FBgn0028986	Spn38F	1184	1121	1193	580	577	546	67.2944	64.7101	67.3414	32.0463	32.079	29.7555	9.07638e-62	5.43874e-60	-1.08074	down
FBgn0039324	CG10553	1404	1346	1484	640	691	734	61.4063	60.3453	64.2718	26.9982	29.4213	29.7775	3.63863e-63	2.27513e-61	-1.07859	down
FBgn0085195	CG34166	3489	3363	3008	1644	1563	1621	1477.1	1448.67	1220.86	660.489	639.499	741.09	1.53154e-95	1.57325e-93	-1.0777	down
FBgn0039597	CG9997	279	261	216	115	139	104	14.7532	13.9921	11.0979	5.6058	6.89619	5.34726	9.52813e-15	1.15512e-13	-1.06583	down
FBgn0033367	PPO2	567	594	547	289	274	270	8.44628	9.81491	8.00185	4.25978	4.1192	3.78422	3.74921e-33	1.073e-31	-1.06579	down
FBgn0043539	Obp22a	103	127	139	53	59	56	26.546	35.622	35.938	11.3167	16.4248	16.7606	1.86904e-09	1.48095e-08	-1.06499	down
FBgn0011694	EbpII	6315	6331	6058	3083	3062	3152	2905.1	2889.96	2743.41	1343.31	1362.86	1513.46	5.02102e-199	1.08994e-196	-1.061	down
FBgn0035694	CG13299	2802	2912	3193	1484	1486	1450	288.414	306.823	310.897	114.929	131.884	127.903	3.8375e-96	3.97752e-94	-1.05904	down
FBgn0050360	Mal-A6	6632	6512	6442	3264	3354	3135	145.195	153.054	138.554	69.9775	72.9163	64.7922	1.44903e-196	3.08724e-194	-1.05838	down
FBgn0030398	Cpr11B	98	70	69	36	33	34	7.69118	5.85387	5.37128	2.82275	2.66837	2.58835	4.83446e-07	2.86113e-06	-1.05784	down
FBgn0034737	CG11362	63	54	67	22	31	25	8.17634	6.86811	8.624	2.70357	3.87615	3.2847	3.3169e-06	1.74251e-05	-1.04785	down
FBgn0003002	opa	25	30	33	7	13	10	0.28218	0.371794	0.365131	0.0822921	0.152981	0.113371	0.000130045	0.000519806	-1.04543	down
FBgn0015300	Ssl	54	69	49	31	16	24	3.03158	4.08971	2.69205	1.6888	0.913398	1.27695	9.69261e-06	4.76961e-05	-1.04473	down
FBgn0264342	CG43798	28	21	29	5	11	9	4.43039	3.37091	4.58312	0.858295	1.75567	1.46112	0.000193183	0.000748843	-1.04044	down
FBgn0037003	CG18281	169	161	135	91	54	73	8.10121	7.9201	6.38001	4.29477	2.51726	3.21756	8.07808e-10	6.67181e-09	-1.03935	down
FBgn0015583	Acp29AB	127	110	87	60	38	50	10.7798	9.55087	7.341	4.85811	3.11713	3.96123	8.58396e-08	5.567e-07	-1.0331	down
FBgn0259967	Sfp53D	126	126	110	54	62	54	12.3454	12.3445	10.7486	5.23702	6.02212	5.09686	3.23283e-09	2.48289e-08	-1.02996	down
FBgn0264726	lncRNA:CR43994	169	185	153	69	82	92	72.2548	78.766	65.3725	27.8188	33.6526	39.5002	3.38454e-11	3.17353e-10	-1.02918	down
FBgn0085369	Drgx	43	45	47	20	17	18	0.811918	0.695	0.930199	0.358309	0.267248	0.424988	2.591e-05	0.000117731	-1.02859	down
FBgn0003300	run	17	24	18	7	3	6	0.227886	0.360976	0.229913	0.0947896	0.0438432	0.0751042	0.000337971	0.00124627	-1.02799	down
FBgn0266213	lncRNA:CR44908	21	35	32	6	12	12	13.535	22.8085	20.3562	3.84615	7.43806	8.21123	0.00018852	0.000733487	-1.02778	down
FBgn0040318	HGTX	45	36	22	14	15	8	0.677277	0.572005	0.324199	0.216872	0.237033	0.117293	0.000152616	0.000602555	-1.02278	down
FBgn0262359	CG43057	59	51	40	31	18	11	10.8424	11.3307	8.03322	4.86743	3.87376	2.6297	4.7082e-05	0.000203945	-1.02196	down
FBgn0038865	cDIP	319	305	292	138	146	171	7.83478	7.98891	7.06315	3.34695	3.61907	3.97119	9.80706e-18	1.41391e-16	-1.01848	down
FBgn0263767	lncRNA:CR43684	491	504	497	284	242	224	179.257	180.91	180.384	100.4	87.3312	84.3348	1.55828e-25	3.30167e-24	-1.01786	down
FBgn0038730	CG6300	207	169	224	107	89	97	5.78366	5.01944	6.17514	2.89934	2.44419	2.4966	5.08466e-12	5.13599e-11	-1.01407	down
FBgn0266588	lncRNA:CR45113	180	181	168	106	72	79	33.5803	34.7227	30.743	18.8138	12.9765	15.046	4.86895e-11	4.48856e-10	-1.01267	down
FBgn0267505	pre-rRNA:CR45845	364	282	313	155	140	182	5.27295	4.03105	4.55755	2.2214	2.00509	2.47693	5.16033e-16	6.70843e-15	-1.01136	down
FBgn0026063	KP78b	114	106	125	49	67	47	1.61709	1.16731	1.70723	0.741531	1.15462	0.634137	2.29393e-08	1.60379e-07	-1.01131	down
FBgn0030339	Cyp28c1	42	77	79	26	39	19	1.14926	2.28397	2.10383	0.758956	1.07923	0.538097	2.29737e-05	0.000105304	-1.00824	down
FBgn0034154	CG5267	41	55	49	20	22	19	4.25937	5.89754	4.95947	2.05492	2.27947	1.86961	2.83774e-05	0.00012787	-1.00767	down
FBgn0039342	CG5107	4351	4348	4099	2103	2223	2270	539.496	548.717	504.285	250.348	266.888	264.356	1.454e-126	2.04004e-124	-1.00731	down
FBgn0033203	CG2070	219	214	212	113	122	83	9.53853	10.0887	9.26222	4.84271	5.24984	3.63486	1.19234e-12	1.25736e-11	-1.007	down
FBgn0038069	CG11608	84	63	52	27	33	28	3.40598	2.70554	2.08112	1.09254	1.3638	1.08508	7.19888e-06	3.61515e-05	-1.0035	down
FBgn0262571	CG43111	104	104	109	41	49	60	17.1106	17.4092	17.7878	6.64171	8.03311	9.65987	5.51694e-08	3.68597e-07	-1.0033	down
FBgn0031929	CG18585	2119	2106	2235	1141	1113	1084	86.3034	91.0611	87.0621	44.2679	41.3059	38.8056	3.65327e-87	3.28366e-85	-1.00121	down
FBgn0032839	AANATL3	244	265	290	126	125	149	16.8476	19.1446	19.7195	8.33942	8.36006	10.0563	3.68725e-15	4.5911e-14	-1.00046	down
FBgn0020416	Idgf1	768	783	808	1635	1608	1738	30.6339	32.5065	31.91	63.6382	63.3785	65.2348	7.01717e-69	5.01444e-67	1.01143	up
FBgn0034140	Lst	1752	1648	1770	3622	3588	3697	72.9575	73.422	71.7573	145.866	147.63	143.33	6.29337e-126	8.61967e-124	1.01497	up
FBgn0040972	CG16978	140	137	140	302	297	317	44.7568	44.566	44.2778	93.0569	93.5293	105.749	2.21267e-18	3.28899e-17	1.03147	up
FBgn0031645	CG3036	1854	1859	1900	4068	3896	4156	37.5292	40.2832	38.4749	81.5266	79.303	78.4814	1.06549e-140	1.61295e-138	1.04856	up
FBgn0002926	ndl	290	276	313	628	639	665	1.39149	1.40553	1.47993	2.88774	3.00249	2.87437	1.83435e-34	5.45328e-33	1.05495	up
FBgn0000053	Gart	2030	2011	1779	4232	4182	4246	28.4554	29.7121	24.4224	50.3466	50.5656	47.6684	1.89426e-118	2.44871e-116	1.05798	up
FBgn0264541	CG43920	14	13	20	45	43	44	4.84829	4.58984	6.69261	14.639	13.8132	14.8194	2.48365e-05	0.000113211	1.0597	up
FBgn0000052	Pfas	2553	2523	2319	5354	5475	5336	21.5727	23.1177	19.3057	44.6656	46.6726	42.4936	2.14118e-156	3.46961e-154	1.06658	up
FBgn0051661	CG31661	94	78	75	194	179	200	4.19677	3.73043	3.31497	8.35264	7.77721	8.15982	5.16492e-13	5.57433e-12	1.07417	up
FBgn0030608	Lsd-2	5019	4896	5144	11092	11017	11048	94.2543	98.4448	95.2091	201.449	204.291	188.528	7.99065e-279	2.78583e-276	1.07921	up
FBgn0037684	Srr	213	205	222	470	473	497	6.26077	6.41456	6.478	13.6888	13.9069	13.973	1.48208e-28	3.59733e-27	1.08057	up
FBgn0267161	asRNA:CR45601	23710	23325	23204	52357	51605	51044	1542.17	1650.83	1488.62	3372.77	3370.62	3183.52	0	0	1.08367	up
FBgn0039562	Gp93	3514	3570	3437	7686	7795	7768	35.1304	39.2078	33.5003	73.1397	75.6006	69.7246	9.49904e-244	2.60206e-241	1.08393	up
FBgn0030310	PGRP-SA	177	191	193	469	400	406	15.4198	18.369	17.1999	41.5703	35.923	35.3489	3.24755e-24	6.60125e-23	1.08743	up
FBgn0039296	Sil1	247	236	254	512	590	562	5.8249	5.88411	5.9033	11.6695	13.7067	12.2892	7.60213e-31	2.00143e-29	1.08766	up
FBgn0003980	Vm26Ab	2275	2251	2201	5143	5047	4858	240.55	256.482	228.345	554.349	557.684	530.98	8.0902e-178	1.63294e-175	1.10005	up
FBgn0000644	Fcp3C	274	226	273	596	618	561	13.9161	12.1277	13.6536	29.3364	31.3091	26.967	1.88091e-32	5.27802e-31	1.11172	up
FBgn0036597	CG4962	29	36	41	89	82	101	2.28927	3.01065	3.1905	6.95318	6.51498	7.56479	3.85154e-08	2.62512e-07	1.11306	up
FBgn0040900	CG17777	65	74	52	168	165	133	6.74454	8.48371	5.87671	15.8532	18.3715	14.5539	3.74871e-11	3.4894e-10	1.11359	up
FBgn0052644	Mur11Da	50	47	59	148	121	117	0.738662	0.756451	0.845386	1.93737	1.63664	1.35427	4.06224e-10	3.44916e-09	1.11533	up
FBgn0004045	Yp1	17456	17610	17020	39864	39770	38083	363.134	403.409	346.596	801.472	817.688	729.841	0	0	1.11733	up
FBgn0038530	AttD	22	24	30	76	76	54	1.70378	1.9054	2.27191	5.71065	5.78424	3.97872	7.18691e-07	4.17182e-06	1.11747	up
FBgn0033659	Damm	305	360	317	718	735	807	20.9481	25.1113	20.5092	45.5276	47.4004	51.3388	3.20034e-39	1.11576e-37	1.12016	up
FBgn0040609	CG3348	159	118	113	356	275	295	21.7144	16.7037	15.2904	47.0504	36.9626	39.8157	1.12057e-16	1.52751e-15	1.12135	up
FBgn0033593	Listericin	248	249	245	714	471	639	46.8932	48.3888	45.7892	130.497	87.2079	118.624	1.78657e-11	1.71683e-10	1.12553	up
FBgn0286723	hll	105	81	111	252	241	219	2.01975	1.66269	2.09904	4.6866	4.54812	3.89431	7.81486e-16	1.01022e-14	1.1287	up
FBgn0039564	Nep7	163	195	160	408	405	406	2.60317	3.35088	2.50556	6.30927	6.39205	6.02202	9.76973e-26	2.08923e-24	1.13493	up
FBgn0013685	mt:ND6	11	1	3	100	336	192	8.24345	1.00971	2.33667	74.0364	251.479	142.48	1.95792e-05	9.08668e-05	1.13528	up
FBgn0014859	Hr38	57	24	42	104	99	120	0.32799	0.150581	0.263321	0.60467	0.574294	0.619072	2.64933e-08	1.84142e-07	1.13742	up
FBgn0037396	CG11459	219	217	197	470	523	500	7.4445	7.83705	6.62597	15.2661	17.1887	15.3477	3.22801e-31	8.63679e-30	1.14573	up
FBgn0034511	GNBP-like3	1261	1431	1228	3135	2936	3028	198.497	234.407	190.532	474.635	450.728	466.929	1.58034e-103	1.78253e-101	1.14838	up
FBgn0085419	Rgk2	49	47	45	119	107	136	0.449609	0.467859	0.395932	1.04693	0.98809	1.16109	2.09592e-10	1.81852e-09	1.15617	up
FBgn0050026	CG30026	163	143	159	365	396	354	8.91613	8.32359	8.46531	18.4437	20.3904	17.1007	7.63613e-25	1.58295e-23	1.15737	up
FBgn0034479	CG8654	310	338	361	803	786	791	7.00629	8.11515	8.0693	18.1119	17.9858	17.3938	3.39284e-47	1.473e-45	1.15811	up
FBgn0030596	CG12398	112	154	160	358	327	347	3.13169	4.55234	4.43648	9.84452	9.12542	9.14502	4.73342e-21	8.32691e-20	1.16107	up
FBgn0025583	IM2	2110	2255	2078	5182	5114	4798	927.04	999.91	897.796	2135.45	2155.88	2153.76	1.15362e-160	2.0419e-158	1.16504	up
FBgn0040503	CG7763	32	30	40	84	87	103	2.5728	2.63827	3.23599	6.68432	6.64932	7.68605	8.97067e-09	6.59895e-08	1.16774	up
FBgn0054054	CG34054	99	78	79	238	202	197	13.7783	11.2486	10.8591	30.587	26.2795	25.9142	2.54018e-15	3.19397e-14	1.16925	up
FBgn0005391	Yp2	31410	30750	28639	72169	70578	70284	611.484	655.705	546.125	1356.96	1356.26	1264.35	9.88049e-304	3.91983e-301	1.17036	up
FBgn0046763	CG17278	307	292	298	748	708	687	9.9873	11.8894	10.7352	24.0979	22.1855	21.4468	5.33266e-45	2.17561e-43	1.17426	up
FBgn0035697	CG10163	17	7	7	38	30	43	0.835551	0.385979	0.344139	1.83115	1.48562	2.04277	1.30306e-05	6.24652e-05	1.17942	up
FBgn0262823	hemo	26	16	13	71	57	42	2.17807	1.42863	1.11475	5.80467	4.7948	3.38345	1.77613e-06	9.75386e-06	1.18126	up
FBgn0035985	Cpr67B	854	885	872	2040	2062	2120	36.01	39.3652	35.6036	82.0725	84.7843	85.233	5.92653e-114	7.2537e-112	1.18634	up
FBgn0031560	CG16713	713	714	677	1787	1735	1518	580.556	570.21	532.265	1343.84	1342.72	1319.03	2.70202e-73	2.07245e-71	1.18798	up
FBgn0263590	asRNA:CR43615	40	31	34	106	106	76	3.02522	2.46783	2.49934	7.74988	8.01617	5.64905	4.96184e-09	3.74334e-08	1.19179	up
FBgn0036997	CG5955	187	200	159	439	450	450	6.41689	7.44169	5.36946	14.9071	15.6479	14.8105	7.2397e-30	1.84685e-28	1.19483	up
FBgn0013688	mt:srRNA	3687	2330	2940	7536	7263	9196	1273.31	730.762	1040.13	2636.41	2551.98	3223.96	3.34362e-10	2.8474e-09	1.19538	up
FBgn0039543	CROT	546	546	534	1278	1343	1316	9.89309	10.6478	9.37867	22.4833	24.2119	21.9313	2.14144e-80	1.78531e-78	1.20432	up
FBgn0040514	CG17169	19	17	14	56	53	47	3.43102	3.12438	2.48962	9.72749	9.39238	8.32313	7.27433e-07	4.21618e-06	1.20693	up
FBgn0030925	Hayan	98	97	97	234	251	262	2.04851	2.3053	2.01893	4.59653	5.40287	4.59085	6.16701e-20	1.0165e-18	1.22396	up
FBgn0041194	Prat2	572	589	572	1402	1435	1439	14.0576	15.3234	13.9062	33.8297	35.2944	33.4983	2.52623e-90	2.38232e-88	1.23229	up
FBgn0030482	CG1673	1180	1110	1100	2730	2827	2800	22.9597	23.0642	21.0721	52.4519	55.6401	51.5617	5.97099e-148	9.28327e-146	1.23663	up
FBgn0038611	CG14309	685	647	671	1585	1687	1734	7.64582	7.71909	7.37572	16.9268	18.2964	17.395	1.43057e-96	1.49625e-94	1.25115	up
FBgn0031111	Obp19c	229	252	235	580	576	661	12.1037	15.0833	11.9546	29.3864	30.6316	32.4395	3.6187e-40	1.30104e-38	1.2515	up
FBgn0033097	Zip42C.2	31	35	29	82	103	92	1.42972	1.69547	1.30236	3.66645	4.66376	3.9398	5.63308e-10	4.7065e-09	1.26544	up
FBgn0039241	CG11089	2941	3025	3188	7781	7727	7503	58.4864	64.7986	62.4182	153.824	156.28	141.557	7.09586e-263	2.33251e-260	1.26817	up
FBgn0052602	Muc12Ea	223	209	202	505	585	551	0.462626	0.480905	0.407691	0.967194	1.14073	0.972147	9.46276e-39	3.25955e-37	1.27623	up
FBgn0040736	IM3	4856	4948	4950	12926	12212	12333	3479.16	3587.92	3463.96	8633.19	8333.14	9807.14	0	0	1.28418	up
FBgn0039200	CG13616	6	3	4	30	14	33	0.546267	0.337478	0.393678	2.41243	1.24384	2.68444	5.38431e-06	2.74707e-05	1.30395	up
FBgn0032652	CG6870	258	282	266	666	730	719	17.2858	19.6112	17.5571	43.2768	48.2193	44.5635	2.47685e-51	1.18241e-49	1.3044	up
Trans_newGene_247	-	45	28	42	88	151	109	1.58387	0.970982	1.49974	2.9528	5.11858	3.49563	2.24748e-10	1.94123e-09	1.30641	up
FBgn0035768	CG14834	367	366	363	950	970	943	10.2385	11.0212	9.91555	25.9311	27.0862	25.2328	1.38032e-70	1.02455e-68	1.30674	up
FBgn0052642	CG32642	285	317	269	733	815	759	9.24866	11.1055	8.4535	22.9004	26.2881	22.4718	3.35546e-53	1.70817e-51	1.31807	up
FBgn0000357	Cp18	5926	6119	5742	15390	15871	15009	652.898	721.558	627.118	1719.23	1797.4	1673.02	0	0	1.3185	up
FBgn0030041	CG12116	2289	2275	2208	5874	5983	5993	72.7296	76.4179	69.4071	180.483	187.25	175.025	2.75511e-299	1.05658e-296	1.33648	up
FBgn0014464	Cp7Fa	4	4	7	22	43	21	0.175712	0.174202	0.252331	0.782669	1.50049	0.709271	2.12406e-06	1.15162e-05	1.34979	up
FBgn0041184	Socs36E	341	366	363	986	1001	905	3.13365	3.77621	3.27385	9.07023	9.58875	7.91738	1.90372e-69	1.36889e-67	1.35297	up
FBgn0032587	CG5953	635	628	667	1664	1743	1818	6.01198	6.641	6.43693	15.1504	15.6584	15.539	1.35055e-114	1.67076e-112	1.3652	up
FBgn0264987	lncRNA:CR44138	61	72	87	208	217	222	12.4702	14.8084	17.6366	39.7823	42.2381	44.0514	1.66103e-20	2.81861e-19	1.38971	up
FBgn0028841	jhamt	17	27	21	58	98	72	1.15854	1.8697	1.40763	3.70603	6.39723	4.51575	1.98197e-09	1.56503e-08	1.38985	up
FBgn0265918	lncRNA:CR44707	3	6	6	29	34	23	0.155645	0.334421	0.299729	1.46963	1.7313	1.04744	7.24825e-07	4.20362e-06	1.40002	up
FBgn0019929	Ser7	637	677	617	1792	1826	1748	20.741	23.3893	19.768	58.2702	60.8818	56.3167	4.92898e-127	7.00098e-125	1.4032	up
FBgn0023129	aay	1555	1576	1469	4332	4202	4471	53.2779	56.3557	50.0545	146.886	144.675	146.481	8.84733e-238	2.31338e-235	1.43459	up
FBgn0031973	Spn28Dc	293	279	274	808	823	805	7.08165	6.71882	6.32736	18.9767	19.9946	18.1945	1.75973e-70	1.2978e-68	1.43955	up
FBgn0003979	Vm26Aa	5527	5510	5160	15207	15488	15162	554.302	595.827	507.798	1512.39	1560.34	1533.03	0	0	1.44055	up
FBgn0265873	lncRNA:CR44662	11	6	11	30	47	54	0.291224	0.162261	0.284686	0.76867	1.20393	1.32673	5.54059e-08	3.69748e-07	1.45348	up
FBgn0030438	CG15721	119	106	128	323	391	346	1.96155	1.82422	2.08928	5.05146	6.206	5.06182	9.15833e-32	2.50873e-30	1.45493	up
FBgn0265498	asRNA:CR44367	76	73	94	259	251	240	3.60465	3.77035	4.69161	13.4273	13.2375	11.8833	2.13978e-25	4.51709e-24	1.46832	up
FBgn0014018	Rel	1285	1395	1295	3799	3804	3921	15.6307	17.9672	15.2838	44.5914	46.4168	43.9257	8.9988e-236	2.25068e-233	1.47009	up
FBgn0053542	upd3	8	5	5	35	36	30	0.122332	0.086065	0.0816097	0.529182	0.549438	0.422458	7.21888e-08	4.7243e-07	1.49081	up
FBgn0000427	2021-12-01	3093	3078	3023	9096	9132	8744	22.8638	24.5517	21.9871	64.8162	66.4267	59.3413	0	0	1.4911	up
FBgn0014466	Cp7Fc	411	416	376	1172	1260	1148	13.8792	15.1407	12.4625	38.1972	42.147	35.6353	3.27282e-95	3.30297e-93	1.49266	up
FBgn0262531	CG43085	3	2	4	31	20	25	0.243507	0.170583	0.296272	2.06255	1.45947	1.76496	1.54565e-07	9.72796e-07	1.50511	up
FBgn0086265	psd	173	167	208	571	545	568	5.87667	6.23059	6.95263	19.1067	18.7965	18.3412	2.98796e-51	1.42052e-49	1.51389	up
FBgn0051926	CG31926	110	78	97	303	330	279	5.22782	3.82324	4.56187	14.0118	15.4338	12.595	1.57718e-29	3.94468e-28	1.52615	up
FBgn0050272	MFS1	13	6	5	48	41	37	0.45685	0.223541	0.192943	1.65505	1.44227	1.23411	1.16124e-08	8.40253e-08	1.53677	up
FBgn0037429	Osi19	4	3	2	28	24	26	0.153111	0.123581	0.0876918	1.00061	0.877074	0.924435	6.08851e-08	4.0304e-07	1.55033	up
FBgn0030575	CG5321	495	498	468	1491	1511	1538	14.2691	15.1123	12.6901	40.6013	42.4542	39.5776	1.03795e-134	1.55087e-132	1.56003	up
FBgn0033153	Gadd45	212	231	204	668	738	657	4.76012	5.5967	4.4962	14.6353	16.5118	13.7031	2.68416e-64	1.7349e-62	1.57308	up
FBgn0036324	CG12520	17	16	14	66	63	72	0.91168	0.869343	0.713234	3.28262	3.15954	3.45944	1.50065e-11	1.4545e-10	1.5902	up
FBgn0032789	CG13083	427	419	432	1406	1337	1363	14.9858	15.5944	14.8623	47.4618	46.1037	44.1854	6.98357e-129	1.01704e-126	1.60539	up
FBgn0036948	CG7298	34	27	31	118	106	124	1.22166	1.06896	1.11844	4.21676	3.89833	4.25636	2.28466e-16	3.04578e-15	1.60869	up
FBgn0035887	Jon66Cii	13	11	16	79	54	53	0.760694	0.722783	0.958688	4.45022	3.14673	2.91691	7.69769e-11	6.95695e-10	1.61019	up
FBgn0266431	CG45061	17	27	10	71	82	80	4.34147	6.85418	2.45102	16.6827	19.6739	19.9689	4.77145e-12	4.83235e-11	1.6133	up
FBgn0036101	NijA	108	131	145	436	436	412	6.39984	8.22081	8.60204	25.7729	25.6906	22.7599	3.32542e-44	1.30133e-42	1.61361	up
FBgn0003983	Vm34Ca	3949	4096	3667	12768	12394	12489	724.537	789.862	662.834	2292.78	2249.33	2334.61	0	0	1.62159	up
FBgn0263038	CG43333	8	3	11	35	45	50	0.0691854	0.0345496	0.0996433	0.295729	0.385598	0.387084	1.81236e-09	1.44099e-08	1.6268	up
FBgn0034480	CG16898	544	478	512	1669	1695	1665	27.798	25.0678	26.1271	82.8676	84.8745	79.1463	6.77349e-152	1.08235e-149	1.63688	up
FBgn0037167	CG11425	83	101	77	284	333	292	5.05403	6.60208	4.63331	16.8733	20.1766	17.231	2.55269e-33	7.36059e-32	1.63912	up
FBgn0033207	CG12826	15	11	6	58	57	49	1.2652	0.980833	0.510875	4.72938	4.75298	4.06033	9.39666e-11	8.42623e-10	1.65187	up
FBgn0000355	Cp15	9105	9462	8386	30374	30637	28605	1452.91	1577.01	1323.18	4659.13	4763.35	4555.11	1.56363e-177	3.04907e-175	1.6594	up
FBgn0004425	LysB	89	96	102	377	321	324	10.266	11.8403	11.5434	41.3085	36.1838	35.6023	8.6567e-39	2.99085e-37	1.68101	up
FBgn0036938	CG14187	77	68	91	253	309	298	13.9501	12.8397	16.2845	43.7535	53.5203	53.1417	1.05231e-32	2.98934e-31	1.69055	up
FBgn0029966	Ir7c	57	54	71	225	235	216	1.5825	1.52314	1.89683	5.91672	6.40687	5.45383	9.97355e-29	2.43621e-27	1.6957	up
FBgn0003046	Pcp	18	17	10	61	82	73	1.00545	1.10624	0.65621	4.08758	6.23412	4.55631	7.81461e-13	8.34018e-12	1.70443	up
FBgn0262540	CG43094	10	5	10	53	40	54	7.37183	1.68979	3.00151	5.61702	5.4929	7.9272	9.16062e-11	8.24026e-10	1.70609	up
FBgn0034407	DptB	164	157	212	564	646	683	44.6987	43.2435	56.7531	149.447	174.846	193.029	3.03378e-56	1.63101e-54	1.70706	up
FBgn0029568	CG11381	89	85	89	327	340	292	2.13612	2.1856	2.09759	7.47719	7.94907	6.39581	1.12395e-38	3.84854e-37	1.70946	up
FBgn0034356	Pepck2	470	534	503	1697	1757	1760	7.13004	9.31424	7.44615	25.0506	26.8183	24.1619	1.24691e-164	2.2771e-162	1.7134	up
FBgn0010222	Nmdmc	611	651	565	2106	2133	2187	22.2857	25.4478	20.1682	73.1061	75.7169	74.249	3.43227e-194	7.05148e-192	1.73961	up
FBgn0014865	Mtk	25	33	30	115	124	131	43.6109	56.9531	49.4695	183.493	204.132	265.022	4.41366e-19	6.89934e-18	1.74212	up
FBgn0033880	CG6553	3	6	7	37	41	41	0.149167	0.330883	0.357963	1.66479	1.87587	1.75553	1.55291e-10	1.36175e-09	1.75596	up
FBgn0037126	CG14567	61	91	76	330	297	261	4.5948	7.06388	5.58009	23.5231	21.6853	19.3875	3.43742e-34	1.0063e-32	1.77326	up
FBgn0000356	Cp16	1070	1079	967	3693	3743	3740	161.122	170.477	143.852	558.334	571.562	577.831	5.03565e-307	2.06911e-304	1.774	up
FBgn0032303	CG6508	41	55	39	193	186	171	1.64347	2.33025	1.55425	7.42684	7.27696	6.27415	1.0489e-25	2.23474e-24	1.77779	up
FBgn0042187	CG17234	73	75	71	304	277	281	7.21009	7.5854	6.96019	29.681	27.3402	26.9138	7.10044e-39	2.46056e-37	1.80141	up
FBgn0039452	CG14245	767	653	717	2711	2617	2616	96.707	87.8103	89.5916	338.59	329.819	327.563	4.22088e-234	1.03322e-231	1.82049	up
FBgn0034329	IM1	2181	2259	1965	8073	7968	7698	969.368	1006.2	867.603	3473.59	3528.22	3580.72	0	0	1.82322	up
FBgn0000358	Cp19	1936	2076	1952	7375	7688	7146	176.259	203.741	175.62	673.423	716.18	650.284	0	0	1.83116	up
FBgn0052774	Muc4B	4	3	0	35	25	36	0.0542663	0.0635414	0	0.474097	0.337687	0.418135	1.03102e-10	9.18103e-10	1.84497	up
FBgn0031034	CG14205	26	20	31	133	114	113	0.580185	0.489914	0.698448	2.90484	2.5396	2.36884	6.8423e-20	1.11978e-18	1.84668	up
FBgn0086266	Vm26Ac	183	196	196	751	754	721	20.9875	23.7115	22.1983	83.5075	85.7683	79.9979	5.60643e-92	5.42034e-90	1.84774	up
FBgn0029697	CG15570	13	14	9	73	71	66	0.15752	0.175807	0.107026	0.807917	0.79688	0.695912	5.59702e-15	6.88703e-14	1.88724	up
FBgn0032788	CG13084	144	129	147	556	583	564	3.34546	3.25164	3.35761	12.3907	13.2167	12.0428	9.70054e-75	7.59216e-73	1.89694	up
FBgn0051928	CG31928	115	118	133	521	485	521	4.19686	4.71925	4.90961	19.4154	17.7278	18.1991	2.37883e-68	1.67905e-66	1.92736	up
FBgn0266488	CG45087	5165	5238	5217	20455	20879	21008	78.1528	86.5757	77.6269	304.055	316.91	297.753	0	0	1.93579	up
FBgn0035176	CG13905	136	122	145	564	526	597	8.65762	8.29239	9.0989	34.7782	33.0127	35.2065	1.53593e-72	1.17025e-70	1.93614	up
FBgn0085362	Vml	90	143	113	487	640	605	3.36082	5.73926	4.1742	18.7169	25.0844	22.6856	9.95374e-26	2.12464e-24	1.98521	up
FBgn0041252	Femcoat	205	175	163	789	801	746	9.42368	8.41914	7.3248	33.4929	34.4588	31.4786	3.6251e-99	3.89783e-97	1.99195	up
FBgn0038299	Spn88Eb	324	308	329	1457	1406	1282	10.527	10.5728	10.5184	45.1349	44.6057	38.4888	8.02052e-160	1.39812e-157	2.01693	up
FBgn0037724	Fst	567	617	551	2391	2529	2620	15.887	18.693	15.3144	64.5076	69.9339	66.0893	6.44109e-261	2.05846e-258	2.04111	up
FBgn0012042	AttA	459	483	463	2126	2054	2041	32.4776	36.1419	32.3487	144.49	140.282	134.804	8.13937e-259	2.5309e-256	2.06701	up
FBgn0039091	CG10182	52	39	39	224	204	227	1.59201	1.26454	1.20748	6.67788	6.1508	6.36047	2.62373e-36	8.43185e-35	2.06843	up
FBgn0027544	CG2217	140	142	167	720	701	643	2.265	2.32138	2.87192	14.9701	14.7431	12.4883	1.39661e-93	1.38517e-91	2.07546	up
FBgn0267130	lncRNA:CR45570	17	27	22	134	138	108	3.15655	5.08311	4.03419	23.7191	24.8296	20.2714	8.49698e-24	1.7031e-22	2.07851	up
FBgn0264253	Send2	10	6	7	62	54	71	0.985198	0.584713	0.733331	5.66151	5.05032	6.29414	4.94738e-16	6.45347e-15	2.08067	up
FBgn0035439	CG14961	19	7	10	87	77	87	0.188464	0.079592	0.0974446	0.8216	0.740861	0.777843	1.63727e-18	2.46233e-17	2.09727	up
FBgn0013277	Hsp70Ba	0	0	1	20	38	34	0.01006	0	0.0190844	0.241404	0.470712	0.392442	3.22766e-13	3.53659e-12	2.09866	up
FBgn0000359	Cp36	609	556	575	2710	2572	2634	20.0757	20.1789	18.5251	87.274	85.277	83.3822	0	0	2.10906	up
FBgn0041180	Tep4	1060	1105	1169	4869	5372	4982	8.59857	9.61157	9.36428	37.9772	42.6757	36.7553	0	0	2.11891	up
FBgn0038469	CG4009	50	48	65	271	280	290	1.04589	1.08262	1.3463	5.49569	5.79795	5.69827	1.52179e-46	6.53289e-45	2.14001	up
FBgn0034741	CG4269	54	72	86	315	378	390	5.38629	7.24753	8.079	30.8833	37.9851	37.6703	8.62296e-51	4.01649e-49	2.14271	up
FBgn0000360	Cp38	522	520	522	2506	2541	2370	15.7553	17.6074	15.8121	74.8575	77.5385	66.7421	5.74058e-308	2.44613e-305	2.16684	up
FBgn0034160	CG5550	115	112	144	631	636	591	7.32706	7.44026	9.06442	39.0373	39.9009	35.7835	1.85993e-91	1.76847e-89	2.18479	up
FBgn0085294	CG34265	5	6	7	66	83	55	1.84593	2.21323	2.28815	20.4619	26.3798	18.1081	1.84125e-19	2.9259e-18	2.34087	up
FBgn0000276	CecA1	315	308	315	1702	1835	1701	212.195	205.241	209.216	1048.83	1150.47	1186.36	2.93831e-257	8.89613e-255	2.38869	up
FBgn0029831	CG5966	1540	1467	1518	8411	8326	8297	26.9742	27.3471	26.2523	143.813	144.974	135.553	0	0	2.40146	up
FBgn0030013	GIIIspla2	783	771	768	4536	4633	4487	25.1496	26.7189	24.0186	142.176	148.909	134.352	0	0	2.48325	up
FBgn0010038	GstD2	49	42	39	323	286	292	3.62708	2.72374	3.04592	20.8364	19.0032	18.5576	1.41627e-59	7.98736e-58	2.5164	up
FBgn0044810	TotX	21	36	24	209	198	214	3.993	6.86924	4.62865	38.3679	36.9809	39.2013	3.05707e-44	1.2004e-42	2.54189	up
FBgn0041579	AttC	464	459	456	2948	2931	2920	24.9631	26.3603	24.2079	153.699	156.098	149.026	0	0	2.59219	up
FBgn0004240	DptA	231	219	242	1451	1558	1560	37.9728	37.2051	38.9735	229.967	249.493	263.969	6.0265e-253	1.77782e-250	2.61768	up
FBgn0041709	yellow-g	35	45	41	298	296	348	1.08691	1.19872	1.10261	7.75175	7.87477	8.95079	4.03501e-64	2.57904e-62	2.6602	up
FBgn0015035	Cyp4e3	271	284	242	1807	1890	1767	8.58628	9.40228	7.59764	54.7426	57.8391	50.8855	6.76594e-298	2.51104e-295	2.67672	up
FBgn0013278	Hsp70Bb	1	3	5	78	68	82	0.0199228	0.0502378	0.0661524	0.918056	0.823753	0.919912	2.71556e-27	6.17441e-26	2.8587	up
FBgn0000279	CecC	22	19	14	197	220	170	10.2246	8.68844	6.31592	82.8554	94.1276	78.961	3.02463e-47	1.32313e-45	2.86265	up
FBgn0262838	CG43202	52	61	72	529	503	559	19.7534	23.244	27.1895	193.812	189.664	217.598	1.04456e-108	1.2263e-106	2.87955	up
FBgn0032835	CG16772	607	584	561	4633	4735	4653	25.616	26.96	23.4175	191.893	197.655	186.056	0	0	2.92189	up
FBgn0039759	CG9733	3	8	6	102	99	104	0.0886022	0.242738	0.169301	2.70574	2.69315	2.6995	8.47704e-33	2.41407e-31	2.93564	up
FBgn0028396	TotA	526	525	492	4350	4492	4621	85.6599	86.1062	79.4812	674.329	698.9	741.217	0	0	3.04241	up
FBgn0000278	CecB	0	0	0	75	54	62	0	0	0	19.3707	14.0923	16.7857	2.08726e-28	4.9925e-27	3.08701	up
FBgn0035328	yellow-g2	17	16	21	217	222	243	0.498308	0.502144	0.585531	5.97391	6.2096	6.43373	3.29739e-59	1.84158e-57	3.10701	up
FBgn0032127	CG13114	26	8	20	257	251	228	0.706801	0.242299	0.550385	6.84273	6.82417	5.87396	1.21192e-61	7.22444e-60	3.19288	up
FBgn0005660	Ets21C	24	30	34	361	347	357	0.349661	0.348905	0.377793	4.58842	4.53858	4.44831	4.87318e-87	4.31276e-85	3.21358	up
FBgn0039666	Diedel	3	1	3	114	103	111	0.849579	0.40327	1.00812	29.1002	26.8427	30.2177	7.01545e-41	2.5542e-39	3.43546	up
FBgn0000277	CecA2	88	110	102	1270	1264	1183	42.8267	53.3492	48.7995	568.206	578.292	579.383	7.61795e-264	2.57778e-261	3.4617	up
FBgn0031701	TotM	92	119	91	1554	1482	1499	13.1802	19.291	13.7635	211.154	212.524	213.029	0	0	3.73745	up
FBgn0044812	TotC	149	161	155	2648	2584	2678	27.5688	30.0856	28.4296	468.568	461.589	490.302	0	0	3.95477	up
FBgn0033830	CG10814	9	21	7	408	453	445	0.267868	0.655301	0.192597	11.0775	12.5829	11.6114	1.08696e-115	1.37423e-113	4.34293	up
