# Supplementary material for: Combination of a nanocarrier delivery system with genetic manipulation further improves pesticide efficiency: a case study with chlorfenapyr
Source: Royal Society of Chemistry journal article supplement (doi:10.1039/d2en00126h), 2022-01-01
Supplement: d2en00126h8.xlsx [file d2en00126h8.xlsx]

## Sheet: Sheet1
Supplementary Table 4
Genes affected by chlorfenapyr in both fly larvae and adults
Gene Name	Change in larvae	Change in adults	Gene Ontology
AANATL3	Down-regulated	Down-regulated	Predicted to have aralkylamine N-acetyltransferase activity.
Amalgam	Up-regulated	Down-regulated	Positive regulator of Epidermal Growth Factor Receptor signaling pathway.
asRNA:CR44367	Up-regulated	Up-regulated	Insufficient information.
AttC	Up-regulated	Up-regulated	Innate immunity response, antibacterial peptide against Gram-negative bacteria.
CecC	Up-regulated	Up-regulated	Innate immunity response, antibacterial peptide against Gram-negative bacteria.
CG10226	Down-regulated	Down-regulated	Predicted to have ABC-type xenobiotic transporter activity.
CG10553	Down-regulated	Down-regulated	Predicted to belong to ecdysteroid kinase-like enzyme family.
CG10814	Up-regulated	Up-regulated	Predicted to be involved in carnitine biosynthetic process.
CG11425	Down-regulated	Up-regulated	Predicted to be involved in phospholipid metabolic process.
CG11459	Up-regulated	Up-regulated	Predicted to be involved in immune response and proteolysis involved in cellular protein catabolic process.
CG12520	Up-regulated	Up-regulated	Predicted to be involved in proteasomal protein catabolic process.
CG12826	Up-regulated	Up-regulated	Insufficient information.
CG13905/Materazzi	Up-regulated	Up-regulated	Immune and stress response.
CG14245	Up-regulated	Up-regulated	Predicted to be involved in chitin metabolic process.
CG14567	Up-regulated	Up-regulated	Insufficient information.
CG16713	Up-regulated	Up-regulated	Predicted to have serine-type endopeptidase inhibitor activity.
CG1673	Down-regulated	Up-regulated	Predicted to be involved in branched-chain amino acid biosynthetic process.
CG16898	Up-regulated	Up-regulated	Predicted to belong to ecdysteroid kinase-like enzyme family.
CG2217	Up-regulated	Up-regulated	Insufficient information.
CG32232	Up-regulated	Down-regulated	Predicted to be gamma-tubulin complex component and involved in meiotic cell cycle.
CG34054	Down-regulated	Up-regulated	Predicted to be involved in immunity response.
CG34166	Up-regulated	Down-regulated	Insufficient information.
CG43085	Up-regulated	Up-regulated	Predicted to be involved in immunity response.
CG43202/BomT1	Up-regulated	Up-regulated	Innate immunity response, regulated by Toll signaling pathway.
CG45061	Up-regulated	Up-regulated	Insufficient information.
CG45087	Up-regulated	Up-regulated	Insufficient information.
CG5550	Up-regulated	Up-regulated	Fibrinogen-related protein.
CG5953	Up-regulated	Up-regulated	MADF-BESS domain transcription regulator.
CG5966	Up-regulated	Up-regulated	Predicted to be involved in lipid catabolic process.
CG6300	Down-regulated	Down-regulated	Predicted to be involved in long-chain fatty acid metabolic process.
CG6553	Up-regulated	Up-regulated	LDL receptor-like superfamily.
CG6839	Down-regulated	Down-regulated	Predicted to have endoribonuclease activity.
CG7763	Up-regulated	Up-regulated	Predicted to have carbohydrate binding activity.
CG8708	Up-regulated	Down-regulated	Predicted to be involved in protein glycosylation.
Cpr11B	Up-regulated	Down-regulated	Cuticular protein.
Cpr67B	Up-regulated	Up-regulated	Cuticular protein.
Cyp4e3	Up-regulated	Up-regulated	Involved in insecticide tolerance.
DptA	Up-regulated	Up-regulated	Innate immunity response, regulated by the immune deficiency pathway.
E(spl)m4-BFM	Up-regulated	Down-regulated	Notch signaling pathway.
E(spl)mgamma-HLH	Up-regulated	Down-regulated	Notch signaling pathway.
Ets21C	Up-regulated	Up-regulated	Stress response, stress inducible transcription factor.
Gadd45	Up-regulated	Up-regulated	Stress response, involved in JNK signaling pathway.
GIIIspla2	Up-regulated	Up-regulated	Involved in phospholipid metabolic process.
GstD2	Up-regulated	Up-regulated	Stress response, involved in detoxification.
GNBP-like3	Up-regulated	Up-regulated	Involved in defense response to other organism.
hll	Up-regulated	Up-regulated	Regulating lipid storage and catabolism.
Hsp70Ba	Up-regulated	Up-regulated	Stress response.
Hsp70Bb	Up-regulated	Up-regulated	Stress response.
Idgf1	Up-regulated	Up-regulated	Member of the chitinase-like protein family, required for the formation of the chitinous apical extracellular matrix.
IM1	Up-regulated	Up-regulated	Innate immunity response, regulated by Toll signaling pathway.
IM2	Up-regulated	Up-regulated	Innate immunity response, regulated by Toll signaling pathway.
IM3	Up-regulated	Up-regulated	Innate immunity response, regulated by Toll signaling pathway.
Lip3	Up-regulated	Down-regulated	Involved in lipid catabolic process.
Listericin	Up-regulated	Up-regulated	Innate immunity response, regulated by JAK-STAT signaling pathway.
LManV	Down-regulated	Down-regulated	Lysosomal α-mannosidase, involved in mannose metabolic process.
LManVI	Down-regulated	Down-regulated	Lysosomal α-mannosidase, involved in mannose metabolic process.
lncRNA:CR44138	Up-regulated	Up-regulated	Insufficient information.
Lst	Up-regulated	Up-regulated	Involved in several processes, including glucose homeostasis, triglyceride homeostasis and longevity.
Mal-A7	Up-regulated	Down-regulated	Involved in carbohydrate metabolic process.
NijA	Up-regulated	Up-regulated	Involved in immune and stress responses.
Ocho	Up-regulated	Down-regulated	Notch signaling pathway.
Pepck2	Up-regulated	Up-regulated	Involved in gluconeogenesis and monocarboxylic acid metabolic process.
PGRP-SA	Up-regulated	Up-regulated	Innate immunity response, involved in Toll signaling pathway.
PPO2	Down-regulated	Down-regulated	Defense response, involved in the melanization reaction.
Prat2	Up-regulated	Up-regulated	Synthesis of inosine monophosphate.
pre-rRNA:CR45845	Down-regulated	Down-regulated	Insufficient information.
Pcp	Up-regulated	Up-regulated	Cuticular protein.
sit	Down-regulated	Down-regulated	Involved in pupal development and steroid biosynthetic process.
Socs36E	Up-regulated	Up-regulated	Innate immunity response, involved in JAK-STAT signaling pathway.
TotA	Up-regulated	Up-regulated	Innate immunity response, regulated by JAK-STAT signaling pathway.
TotC	Up-regulated	Up-regulated	Innate immunity response, regulated by JAK-STAT signaling pathway.
yellow-g	Up-regulated	Up-regulated	Female reproductive maturation.
