# Supplementary material for: Combination of a nanocarrier delivery system with genetic manipulation further improves pesticide efficiency: a case study with chlorfenapyr
Source: Royal Society of Chemistry journal article supplement (doi:10.1039/d2en00126h), 2022-01-01
Supplement: d2en00126h10.pdf [file d2en00126h10.pdf]

**Table S5. Particle size of chlorfenapyr and chlorfenapyr/SPc complex.**

| Formulation                 | Concentration | Sample number | Size (nm) | Average size (nm) |
|-----------------------------|---------------|---------------|-----------|-------------------|
| Chlorfenapyr                | 800 µg/ml     | 1             | 2578.86   |                   |
|                             |               | 2             | 1849.35   | 2104.29±237.50a   |
|                             |               | 3             | 1884.67   |                   |
|                             | 200 µg/ml     | 1             | 1594.57   |                   |
|                             |               | 2             | 1449.82   | 1519.14±41.90b    |
|                             |               | 3             | 1513.03   |                   |
| Chlorfenapyr/SPc<br>complex | 800 µg/ml     | 1             | 335.52    |                   |
|                             |               | 2             | 329.63    | 335.04±3.00c      |
|                             |               | 3             | 339.98    |                   |
|                             | 200 µg/ml     | 1             | 177.65    |                   |
|                             |               | 2             | 170.83    | 166.52±7.96c      |
|                             |               | 3             | 151.09    |                   |

Means ± SE followed by different letters are significantly different (Tukey HSD test,  $P < 0.05$ ).
