# Supplementary figures and images for: Combination of a nanocarrier delivery system with genetic manipulation further improves pesticide efficiency: a case study with chlorfenapyr
Source: Royal Society of Chemistry journal article supplement (doi:10.1039/d2en00126h), 2022-01-01

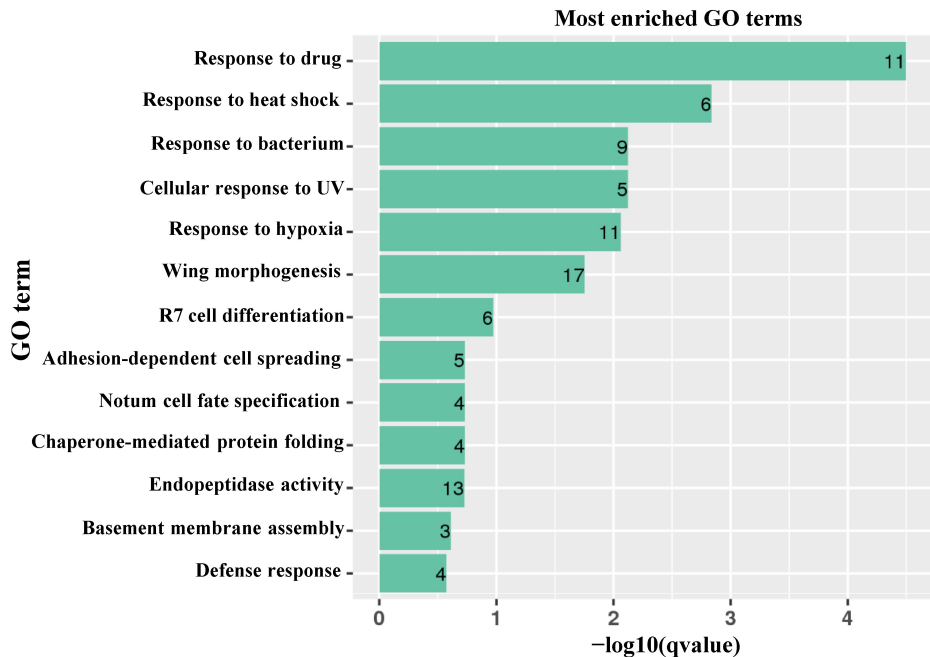

Supplement: d2en00126h2.pdf [file d2en00126h2.pdf]

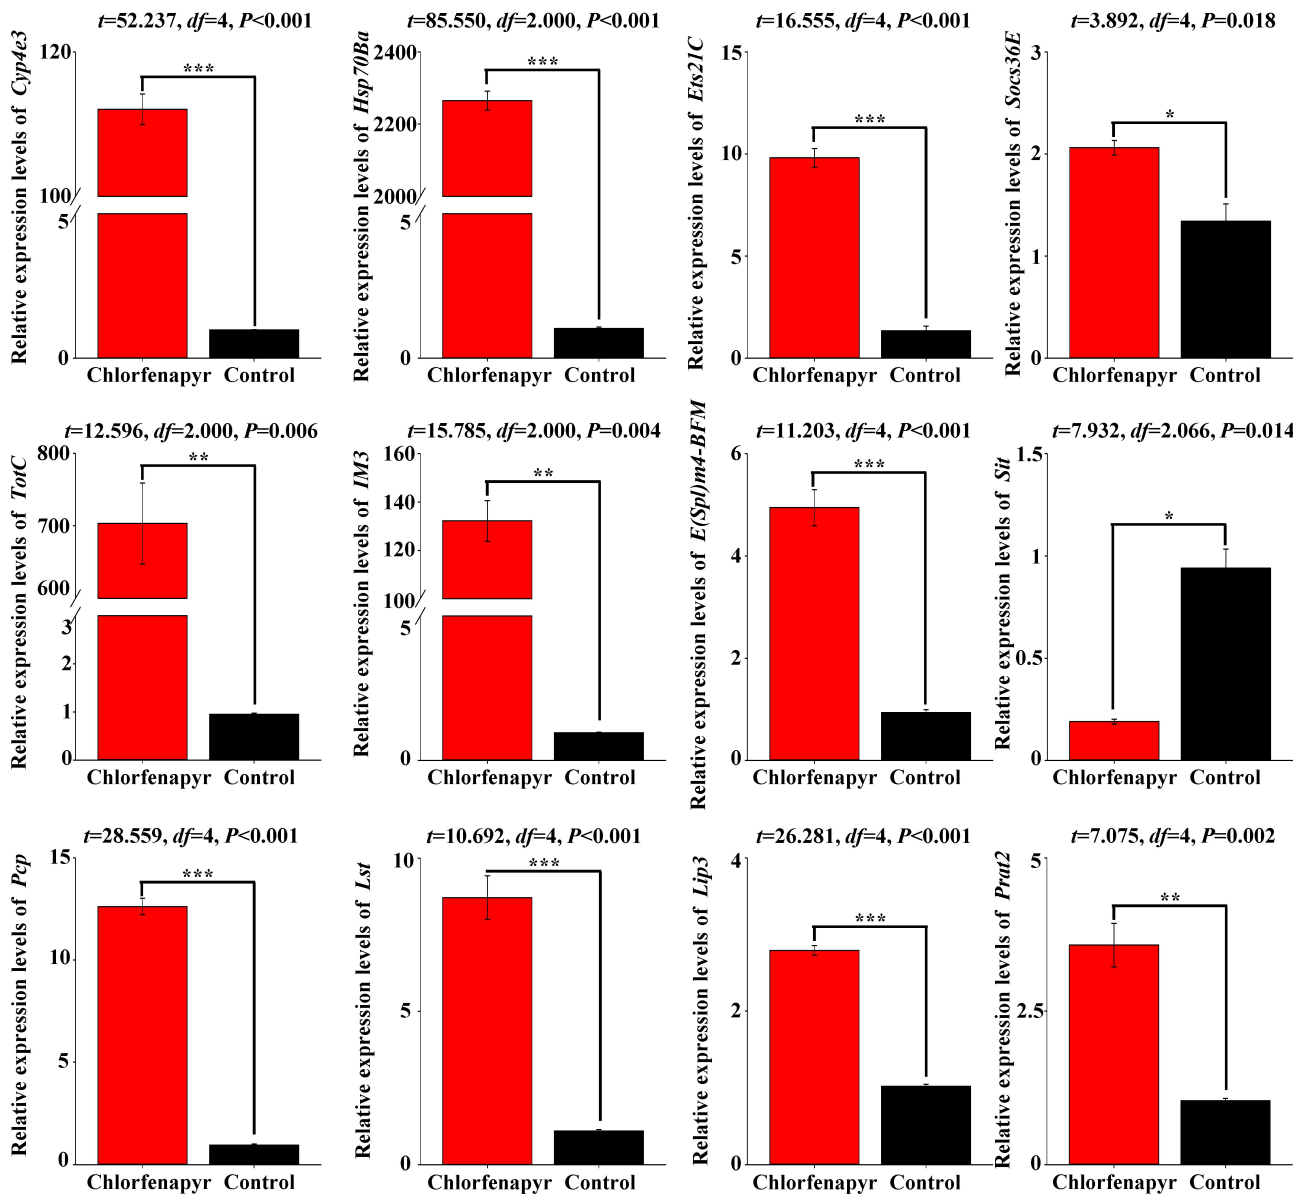

Supplement: d2en00126h3.pdf [file d2en00126h3.pdf]

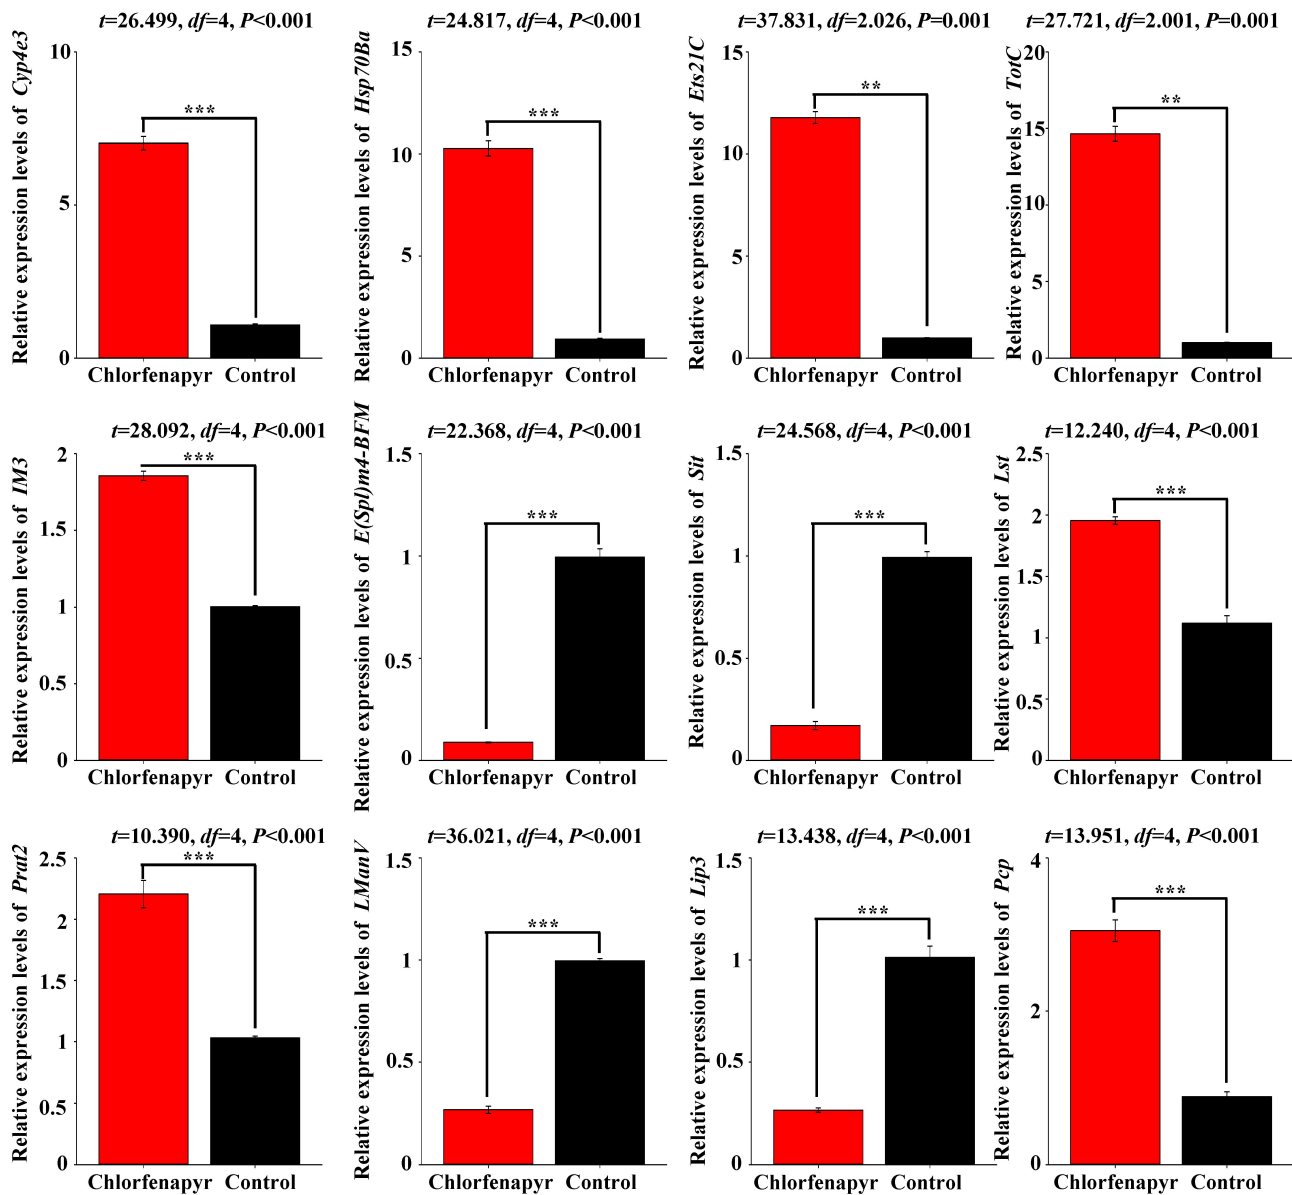

Supplement: d2en00126h4.pdf [file d2en00126h4.pdf]
